# Supplementary material for: Overweight in Indonesia: an observational study of trends and risk factors among adults and children
Source: PubMed Central journal article supplement — BMJ Open. 2019 Sep 27;9(9):e031198. doi: 10.1136/bmjopen-2019-031198 (PMC6773342; doi:10.1136/bmjopen-2019-031198), 2019-09-27
Supplement: bmjopen-2019-031198.draft_revisions.pdf [file bmjopen-2019-031198.draft_revisions.pdf]

# BMJ Open

BMJ Open is committed to open peer review. As part of this commitment we make the peer review history of every article we publish publicly available.

When an article is published we post the peer reviewers' comments and the authors' responses online. We also post the versions of the paper that were used during peer review. These are the versions that the peer review comments apply to.

The versions of the paper that follow are the versions that were submitted during the peer review process. They are not the versions of record or the final published versions. They should not be cited or distributed as the published version of this manuscript.

BMJ Open is an open access journal and the full, final, typeset and author-corrected version of record of the manuscript is available on our site with no access controls, subscription charges or pay-per-view fees (<http://bmjopen.bmj.com>).

If you have any questions on BMJ Open's open peer review process please email [info.bmjopen@bmj.com](mailto:info.bmjopen@bmj.com)

# BMJ Open

## Overweight trends and determinants among adults and children in Indonesia

|                               |                                                                                                               |
|-------------------------------|---------------------------------------------------------------------------------------------------------------|
| Journal:                      | <i>BMJ Open</i>                                                                                               |
| Manuscript ID                 | bmjopen-2019-031198                                                                                           |
| Article Type:                 | Research                                                                                                      |
| Date Submitted by the Author: | 21-Apr-2019                                                                                                   |
| Complete List of Authors:     | Oddo, Vanessa; University of Washington School of Public Health, Maehara, Masumi ; UNICEF<br>Rah, Jee; UNICEF |
| Keywords:                     | Overweight, Indonesia, Nutrition Transition, Indonesian Family Life Survey                                    |
|                               |                                                                                                               |

SCHOLARONE™  
Manuscripts

## Overweight trends and determinants among adults and children in Indonesia

Vanessa M. Oddo<sup>1</sup>, Masumi Maehara<sup>2</sup>, Jee Hyun Rah<sup>2</sup>

<sup>1</sup>University of Washington School of Public Health, Department of Health Services, Seattle

Washington, USA

<sup>2</sup>Child Survival and Development, United Nations Children' Fund, Jakarta, Indonesia

### Corresponding Author:

Vanessa M. Oddo  
University of Washington School of Public Health  
Department of Health Services  
330 Raitt Hall  
Seattle, WA 98195  
E: [voddo@uw.edu](mailto:voddo@uw.edu)  
P: 206-685-8723

**Word Count: 3691**

## ABSTRACT

**Objective:** To conduct a secondary data analysis detailing overweight prevalence and associations between key hypothesized determinants and overweight.

**Design:** This study is observational and used data from the Indonesian Family Life Survey (IFLS) (1993-2014). The IFLS is a home-based survey that collected socioeconomic, food intake, and physical activity data, and measured anthropometrics, on individual children and adults

**Setting:** Indonesia.

**Primary Outcome Measures:** We utilized the IFLS to describe the distribution of overweight by gender among adults ( $\text{BMI} \geq 25 \text{ kg/m}^2$ ) and by age among children, over time. Overweight was defined as weight-for-height z-score  $> 2$ , among children aged 0-5 years and as BMI-for-age z-score  $> 1$ , among children aged 6-18 years. We described individuals who were overweight, by selected characteristics over time and then employed multivariate logistic regression to explore risk factors and their association with overweight in 2014.

**Results:** One-third of adults were overweight in 2014 and women consistently had a higher overweight prevalence compared to men. Between 1993 and 2014 the prevalence of overweight increased by 100% and 88%, among women and men, respectively. Among children and adolescents, the prevalence of overweight increased by more than 100% (1993-2014). In 2014, 7.5% of children aged 0-5 years were overweight, as were about 15% of school-age children and adolescents. Although overweight prevalence remains higher in urban areas, the increase in overweight prevalence was larger among rural (versus urban) residents, and by 2014 the proportions of overweight adults were evenly distributed by wealth. Urban area residence, higher wealth, higher education, and consumption of energy-dense foods were associated with higher odds of overweight among most adults and children.

1  
2  
3 **Conclusions:** Urgent program and policy action is needed to reduce and prevent overweight  
4 among all ages.  
5  
6

7  
8 **Key Words:** Overweight, Indonesia, nutrition transition, Indonesian Family Life Survey  
9  
10  
11  
12  
13  
14  
15  
16  
17  
18  
19  
20  
21  
22  
23  
24  
25  
26  
27  
28  
29  
30  
31  
32  
33  
34  
35  
36  
37  
38  
39  
40  
41  
42  
43  
44  
45  
46  
47  
48  
49  
50  
51  
52  
53  
54  
55  
56  
57  
58  
59  
60

For peer review only

## Strengths and Limitations of this Study

- We are able to compare overweight trends over time among all age groups, explore the consumption of energy-dense foods and physical activity, and investigate hypothesized risk factors for overweight using regression-based methods.
- We use a recent dataset that is nationally representative of Indonesia.
- We largely employ cross-sectional data, therefore, we cannot infer any causal associations and there may be unmeasured confounding.
- Data on the consumption of a select number of energy-dense foods was only collected in 2014, which limits our ability to make conclusions about the association between energy-dense foods and overweight.
- Physical activity levels were based on respondent recall.

## INTRODUCTION

Indonesia is undergoing a nutrition transition, defined as characteristic changes in diet and physical activity patterns [1,2]. The double burden of malnutrition – defined as the co-existence of undernutrition and overnutrition – is therefore an increasing concern in Indonesia [3]. The National Basic Health Research Survey showed that the prevalence of adult overweight (body mass index [BMI]  $\geq 25$  kg/m<sup>2</sup>) increased from 22% in 2010 to 26% in 2013, and was 35% in 2018. Yet, overweight has received relatively little programmatic attention, despite its grave consequences on the risk of non-communicable diseases, which are major drivers of health care costs. Moreover, there is limited information on the changing prevalence and risk factors of overweight by age group in Indonesia.

Globally, both macro- and micro factors have been found to be associated with overweight. At the macro-level, there is strong positive and linear relationship between national per capita income and overweight. These increases in national income are characterized by a shift away from traditional diets toward processed foods, that are higher in fat and calories, and decreased physical activity. Poor dietary habits are increasingly common among Indonesians, which is largely related to the changing food environment. Food availability per capita has grown by 40% in Indonesia, with 20% coming from fat sources (e.g. palm oil) [4]. Data from the 2013 National Basic Health Research Survey indicated inadequate consumption of fruits and vegetables among the majority of Indonesians, and one prior study reported that higher consumption of meat and dairy was associated with a higher prevalence of obesity in Indonesia [5]. Prior evidence from Indonesia and the Southeast Asia region also suggests widespread consumption of energy-dense foods and a positive association between consumption of processed foods, meat, dairy, and “Western foods”

1  
2  
3 and overweight prevalence among children and adults [4–6]. The population is also increasingly  
4  
5 adopting a more sedentary lifestyle [3].  
6  
7

8 Few prior studies have used national-level data in Indonesia to explore the trends and  
9  
10 determinants of overweight across different age groups, nor have most prior studies assessed  
11  
12 determinants of overweight using regression-based methods, which better account for  
13  
14 confounding. The objective of this paper was to conduct a secondary data analysis detailing  
15  
16 overweight prevalence and associations between key hypothesized determinants and overweight,  
17  
18 for all age groups in Indonesia. We believe the evidence will be useful for future advocacy efforts  
19  
20 on obesity prevention and to inform relevant policy dialogues and program design.  
21  
22  
23

## 24 **METHODS**

### 25 **Survey Design and Study Population**

26  
27  
28 These analyses utilized the publicly available Indonesian Family Life Survey (IFLS),  
29  
30 which has previously been detailed elsewhere [7]. The IFLS is a longitudinal, home-based survey  
31  
32 that collected socioeconomic and health data on individual respondents including children aged 0-  
33  
34 18 years and adults  $\geq 19$ , and their households over time. The survey was first fielded in 1993 and  
35  
36 there have been four subsequent rounds of data collection (1997, 2000, 2007, 2014). Follow-up  
37  
38 surveys were fielded on the full sample and split-off households. Therefore, new members were  
39  
40 added to the panel during each subsequent survey wave.  
41  
42  
43  
44  
45

46  
47 The original, multi-stage sampling frame was based on households from 13 out of 27  
48  
49 Indonesian provinces: North Sumatra, West Sumatra, South Sumatra, Lampung, DKI Jakarta,  
50  
51 West Java, Central Java, Yogyakarta, East Java, Bali, West Nusa Tenggara, South Kalimantan,  
52  
53 and South Sulawesi. This represented approximately 83% of the Indonesian population in 1993  
54  
55 [7]. Indonesia now has 34 provinces, as eight have been added since 1999. As individuals moved  
56  
57  
58  
59



1  
2  
3 between provinces within Indonesia over time, additional provinces were represented in the  
4 survey. In 2014, 24 provinces were represented.  
5  
6  
7

## 8 **Survey Questions**

9

10  
11 Many questions were consistently asked during each survey wave, but some were added or  
12 eliminated over the 20-year survey period to reflect the changing economic context. The household  
13 questionnaire collected information on household characteristics such as its size, physical  
14 infrastructure, access to sanitation and water sources, and food expenditures. Each selected adult  
15 respondent was inquired about demographic and socioeconomic characteristics, educational  
16 attainment, decision making, smoking history, mental health, and health care utilization.  
17 Beginning in 2000, adults were also asked about their food intake in the past week, specifically,  
18 whether they ate each food type and the frequency of consumption. In 2000 and 2007, questions  
19 focused on dietary staples (e.g. rice, eggs, dairy) and iron- and vitamin-A rich foods (e.g. meat,  
20 green leafy vegetables, carrots, sweet potatoes). Energy-dense foods (instant noodles, fast food,  
21 soft drinks, fried snacks) were added in 2014. In addition, married women were asked about their  
22 reproductive history and breastfeeding and complementary feeding practices for children born  
23 within the five years prior to the survey.  
24  
25  
26  
27  
28  
29  
30  
31  
32  
33  
34  
35  
36  
37  
38  
39  
40  
41

42 In 2007 and 2014, adults were asked about the type, duration ( $< 2$  hours or  $\geq 2$  hours), and  
43 number of days of physical activities they engaged during the last week. Activity type included  
44 vigorous activity, moderate activity, and walking, using a modified version of the International  
45 Survey on Physical Activities. Vigorous physical activity was defined as any activities that make  
46 you breathe much harder than normal (e.g. heavy lifting, digging, cycling with loads). Moderate  
47 physical activity was defined as any activities that make you breathe somewhat harder than normal  
48  
49  
50  
51  
52  
53  
54  
55  
56  
57  
58  
59  
60

1  
2  
3 (e.g. carrying light loads, bicycling, or mopping the floor). Walking included at work and at home,  
4 walking from place to place, and walking for recreation.  
5  
6  
7

8 The child questionnaire paralleled the adult questionnaire, with age-appropriate  
9 modifications. Specifically, information was collected on age, gender, educational attainment,  
10 morbidities, healthcare utilization, and food frequency. Physical activity was not collected among  
11 children. For children younger than 11, the mother, female guardian, or household caretaker  
12 answered the questions. Children aged  $\geq 11$  years were allowed to respond for themselves.  
13  
14  
15  
16  
17  
18  
19

20 Height and weight were measured for adults and children by trained interviewers, using a  
21 rigorous research protocol [7]. Interviewers completed both didactic and hands-on anthropometric  
22 training and after completing each questionnaire and measurements in the field, interviewers  
23 checked for completeness and errors, using a computer assisted program. Supervisors randomly  
24 observed interviewers to ensure that measurements were being performed according to the training  
25 instructions. Height was measured to the nearest millimeter using a Seca plastic height board.  
26 Recumbent height was measured among children aged  $< 24$  months. Weight was measured to the  
27 nearest one-tenth of a kilogram using a Camry model EB1003 scale.  
28  
29  
30  
31  
32  
33  
34  
35  
36  
37  
38

### 39 **Statistical Analysis**

40  
41  
42 Overweight served as our *a priori* primary endpoint (i.e. outcome). Among adults (aged  $\geq$   
43 19 years) overweight was defined as BMI  $\geq 25$  kg/m<sup>2</sup>. Among children and adolescents aged 6-  
44 18 years, overweight was defined as BMI-for-age z-score  $> 1$  using the World Health  
45 Organization (WHO) reference [8]. Among children aged 0-5 years, overweight was defined as  
46 weight-for-height [WHZ] z-score  $> 2$  using the Multicentre Growth Reference Study standard  
47 [9].  
48  
49  
50  
51  
52  
53  
54  
55  
56  
57  
58  
59  
60

1  
2  
3 Appropriate cutoffs were applied to create dichotomous or categorical variables for age,  
4 education attainment, and occupation. Urban/rural residence, diet, and physical activity data were  
5 modelled as binary variables. Household wealth quintiles were created using principal component  
6 analysis, using following variables: type of floor material, type of toilet, type of cooking fuel and  
7 ownership of assets including: land, livestock, vehicle(s), household appliances, furniture and  
8 utensils, jewelry, and monetary savings. Dichotomous variables were created from the  
9 aforementioned categorical variables and a frequency test was run for each of the new variables to  
10 ensure that those variables with a variance of zero were removed. The wealth score was then split  
11 into quintiles based on the distribution of the data in a given survey year.  
12  
13  
14  
15  
16  
17  
18  
19  
20  
21  
22  
23

24 Household food expenditures on rice and cooking oil represented the household level  
25 expenditure on each item as a percentage of the households' total expenditures on food. Food  
26 expenditures were then dichotomized as lower and higher based on the mean value in each survey  
27 year. Rice was selected as it is a key staple in Indonesia. Cooking oil was also selected because it  
28 has been shown to perpetuate energy imbalance.  
29  
30  
31  
32  
33  
34  
35

36 Descriptive statistics are presented as percentages for categorical variables or means for  
37 continuous variables. The distribution of overweight by gender (adult women and adult men aged  
38 and  $\geq 19$  years) and age (0-5 years, 6-12 years, 13-18 years) was detailed for each survey year.  
39 Then, we described individuals who were overweight, by the aforementioned characteristics (e.g.  
40 education, wealth), from 1993 to 2014. Finally, we described the distribution of the consumption  
41 of energy-dense foods (2014) and of physical activity among adults (2007, 2014).  
42  
43  
44  
45  
46  
47  
48  
49

50 Prior conceptual models [10–12], along with the availability of data in the IFLS were used  
51 to identify plausible determinants of the obesity endemic in Indonesia. In order to create a  
52 parsimonious model, univariate analyses first explored risk factors and their association with  
53  
54  
55  
56  
57  
58  
59

1  
2  
3 overweight, using cross-sectional logistic regression models, for five groups in 2014: adult women,  
4 adult men, children aged 0-5 years, children aged 6-12 years, and children aged 13-18 years.  
5  
6 Largely, variables were included in multivariate models if they were statistically significantly  
7 associated with the dependent variable in univariate models (defined as  $p < 0.05$ ). Age, gender,  
8 urban/rural residence, and wealth were included in the multivariate logistic regression models  
9 irrespective of statistical significance. Pregnant women were excluded from analyses. We assessed  
10 multicollinearity in all models.  
11  
12  
13  
14  
15  
16  
17  
18  
19

20 In sensitivity analyses, we explored the association between selected risk-factors and  
21 overweight among adults, over time (1993-2014), using modified Poisson models [13]. These  
22 longitudinal models were considered sensitivity analyses because individual-level consumption of  
23 energy dense foods and physical activity data were not available in prior years. Alpha was set to  
24 0.05 to determine statistical significance. All analyses employed sampling weights, which account  
25 for the survey design and were performed using Stata 15.1 (StataCorp LP, College Station, TX).  
26  
27 Neither patients nor the public were involved in this secondary data analysis.  
28  
29  
30  
31  
32  
33  
34  
35

## 36 RESULTS

37  
38  
39 Between 1993 and 2014 the prevalence of overweight among adults doubled from 17.1%  
40 to 33.0% (Figure 1). The prevalence of overweight among children under-five years increased  
41 from 4.2% to 9.4% between 1993 and 2007, but since then, remained relatively stagnant. Among  
42 children aged 6-12 years and 13-18 years, the prevalence of overweight increased from 5.1% and  
43 7.1% in 1993 to 15.6% and 14.1% in 2014, respectively.  
44  
45  
46  
47  
48  
49  
50

51 The characteristics of overweight individuals are presented in Tables 1-4 and in  
52 Supplemental Table 1. More women and men aged over 40 years (versus younger ages) were  
53 overweight over the past two decades (Tables 1-2). Over time, most overweight women and men  
54  
55  
56  
57  
58  
59  
60

had at least primary school education, and more than half lived in urban areas. The distribution of wealth among overweight adults varied over time. In 1993, the largest percentage of overweight women (29.4%) was in the richest households, whereas in 2014, wealth was evenly distributed (~20%). Trends were similar for men.

**Table 1. Percent Distribution of Selected Characteristics Among Overweight Adult Women Aged 19 + in Indonesia Over Time**

|                             | 1993 <sup>1,2</sup> |      | 1997 <sup>1,2</sup> |      | 2000 <sup>1,2</sup> |      | 2007 <sup>1,2</sup> |      | 2014 <sup>1,2</sup> |      |
|-----------------------------|---------------------|------|---------------------|------|---------------------|------|---------------------|------|---------------------|------|
|                             | n                   | %    | n                   | %    | n                   | %    | n                   | %    | n                   | %    |
| <b>Age</b>                  |                     |      |                     |      |                     |      |                     |      |                     |      |
| 19-29 y                     | 97                  | 18.9 | 248                 | 18.7 | 423                 | 14.7 | 848                 | 15.6 | 1,197               | 10.9 |
| 30-39 y                     | 253                 | 38.1 | 531                 | 32.6 | 728                 | 30.5 | 1,167               | 24.8 | 1,937               | 19.6 |
| 40-49 y                     | 178                 | 25.4 | 473                 | 27.0 | 699                 | 29.9 | 1,044               | 31.1 | 1,511               | 31.9 |
| 50-59 y                     | 97                  | 14.3 | 255                 | 13.2 | 342                 | 15.4 | 618                 | 17.6 | 996                 | 24.4 |
| ≥ 60 y                      | 24                  | 3.3  | 169                 | 8.6  | 254                 | 9.6  | 389                 | 10.9 | 551                 | 13.2 |
| <b>Education</b>            |                     |      |                     |      |                     |      |                     |      |                     |      |
| No Education                | 39                  | 7.3  | 225                 | 14.5 | 276                 | 11.2 | 279                 | 9.1  | 263                 | 6.9  |
| Primary                     | 415                 | 66.7 | 832                 | 61.7 | 1,232               | 54.6 | 1,702               | 53.7 | 2,198               | 50.4 |
| Junior or Senior            | 152                 | 20.3 | 308                 | 19.4 | 711                 | 27.0 | 1,109               | 28.6 | 2,077               | 32.8 |
| University                  | 43                  | 5.7  | 69                  | 4.4  | 172                 | 7.2  | 335                 | 8.6  | 623                 | 9.9  |
| <b>Parity<sup>3</sup></b>   |                     |      |                     |      |                     |      |                     |      |                     |      |
| ≤ 2                         | 16                  | 15.2 | 20                  | 43.1 | 71                  | 20.1 | 56                  | 20.1 | 428                 | 35.8 |
| 3-4                         | 19                  | 17.7 | 8                   | 14.2 | 72                  | 18.4 | 76                  | 24.9 | 230                 | 29.9 |
| ≥ 5                         | 84                  | 67.1 | 20                  | 42.7 | 254                 | 61.5 | 191                 | 55.0 | 306                 | 34.4 |
| <b>Smoking Status</b>       |                     |      |                     |      |                     |      |                     |      |                     |      |
| Non-Smoker                  | 614                 | 96.7 | 1,553               | 95.6 | 2,311               | 96.1 | 3,889               | 97.5 | 6,027               | 97.4 |
| Smoker                      | 25                  | 3.3  | 73                  | 4.4  | 99                  | 3.9  | 101                 | 2.5  | 134                 | 2.6  |
| <b>Marital Status</b>       |                     |      |                     |      |                     |      |                     |      |                     |      |
| Never Married               | 10                  | 2.8  | 85                  | 5.0  | 146                 | 4.8  | 237                 | 4.9  | 291                 | 3.1  |
| Married                     | 582                 | 89.1 | 1,336               | 82.7 | 1,926               | 80.4 | 3,298               | 81.9 | 5,185               | 81.7 |
| Other                       | 49                  | 8.1  | 220                 | 12.3 | 351                 | 14.8 | 475                 | 13.2 | 714                 | 15.2 |
| <b>Employment</b>           |                     |      |                     |      |                     |      |                     |      |                     |      |
| Not working                 | 362                 | 57.0 | 803                 | 50.8 | 969                 | 39.8 | 1,527               | 37.6 | 2,178               | 35.2 |
| Agriculture                 | 27                  | 5.5  | 135                 | 8.8  | 260                 | 11.6 | 517                 | 14.5 | 816                 | 15.6 |
| Skilled Manual <sup>4</sup> | 44                  | 6.2  | 141                 | 9.3  | 201                 | 9.3  | 315                 | 8.2  | 479                 | 8.4  |
| Skilled <sup>5</sup>        | 202                 | 31.3 | 545                 | 31.1 | 956                 | 39.2 | 1,616               | 39.7 | 2,618               | 40.8 |
| <b>Residence</b>            |                     |      |                     |      |                     |      |                     |      |                     |      |

|                                      |              |     |      |       |      |       |      |       |      |       |      |
|--------------------------------------|--------------|-----|------|-------|------|-------|------|-------|------|-------|------|
|                                      | Rural        | 150 | 33.4 | 583   | 43.0 | 893   | 41.5 | 1,604 | 47.3 | 2,286 | 46.0 |
|                                      | Urban        | 499 | 66.6 | 1,093 | 57.0 | 1,553 | 58.5 | 2,462 | 52.7 | 3,906 | 54.0 |
| <b>Wealth</b>                        |              |     |      |       |      |       |      |       |      |       |      |
|                                      | Lowest       | 81  | 14.4 | 238   | 17.3 | 323   | 15.2 | 603   | 16.3 | 1,095 | 23.0 |
|                                      | Second       | 64  | 10.3 | 233   | 16.9 | 388   | 19.5 | 875   | 27.6 | 1,087 | 22.7 |
|                                      | Middle       | 163 | 21.0 | 312   | 23.4 | 430   | 20.9 | 521   | 15.8 | 781   | 17.3 |
|                                      | Fourth       | 203 | 24.9 | 270   | 19.9 | 426   | 20.8 | 679   | 20.4 | 894   | 18.7 |
|                                      | Highest      | 645 | 29.4 | 330   | 22.5 | 475   | 23.5 | 645   | 19.9 | 848   | 18.3 |
| <b>Family Size</b>                   |              |     |      |       |      |       |      |       |      |       |      |
|                                      | ≤ 4          | 249 | 40.2 | 533   | 33.3 | 1,161 | 48.8 | 1,274 | 30.2 | 3,898 | 65.3 |
|                                      | > 4          | 400 | 59.8 | 1,143 | 66.7 | 1,285 | 51.2 | 2,792 | 69.8 | 2,294 | 34.7 |
| <b>Province</b>                      |              |     |      |       |      |       |      |       |      |       |      |
|                                      | Bali         | 78  | 18.6 | 213   | 13.0 | 305   | 14.0 | 522   | 16.8 | 774   | 17.0 |
|                                      | Central Java | 107 | 26.0 | 243   | 22.7 | 369   | 24.2 | 576   | 24.3 | 885   | 25.1 |
|                                      | West Java    | 92  | 20.4 | 272   | 23.5 | 416   | 25.6 | 606   | 19.4 | 955   | 19.8 |
|                                      | Other        | 372 | 35.0 | 948   | 41.0 | 1,353 | 36.1 | 2171  | 39.4 | 3,232 | 38.0 |
| <b>Food Expenditures<sup>6</sup></b> |              |     |      |       |      |       |      |       |      |       |      |
| <i>Rice</i>                          |              |     |      |       |      |       |      |       |      |       |      |
|                                      | Lowest       | 186 | 49.5 | 880   | 53.1 | 1,242 | 51.6 | 2,114 | 53.2 | 3,137 | 53.0 |
|                                      | Highest      | 205 | 50.5 | 790   | 46.9 | 1,198 | 48.4 | 1,951 | 46.8 | 3,051 | 47.0 |
| <i>Cooking oil</i>                   |              |     |      |       |      |       |      |       |      |       |      |
|                                      | Lowest       | 198 | 42.5 | 786   | 49.3 | 1,174 | 48.6 | 1,827 | 45.4 | 3,562 | 58.6 |
|                                      | Highest      | 340 | 57.5 | 882   | 50.7 | 1,266 | 51.4 | 2,238 | 54.6 | 2,625 | 41.4 |

<sup>1</sup> Overweight is defined as body mass index  $\geq 25\text{kg/m}^2$ . Percentages are weighted to be representative of the population of Indonesia in the given survey year

<sup>2</sup> Excludes women who are currently pregnant

<sup>3</sup> Parity is only queried among ever-married women

<sup>4</sup> Skilled manual labor combines the following employment sectors: mining, manufacturing, electric, gas, water maintenance, and construction

<sup>5</sup> Skilled labor combines the following employment sectors: retail and service, transportation

<sup>6</sup> Represents the household level expenditure on each item as a percentage of the households' total expenditures on food

**Table 2. Percent Distribution of Selected Characteristics Among Overweight Men Aged 19 + in Indonesia Over Time**

|            | 1993 <sup>1</sup> |     | 1997 <sup>1</sup> |     | 2000 <sup>1</sup> |     | 2007 <sup>1</sup> |     | 2014 <sup>1</sup> |       |      |
|------------|-------------------|-----|-------------------|-----|-------------------|-----|-------------------|-----|-------------------|-------|------|
|            | n                 | %   | n                 | %   | n                 | %   | n                 | %   | n                 | %     |      |
| <b>Age</b> |                   |     |                   |     |                   |     |                   |     |                   |       |      |
|            | 19-29 y           | 27  | 7.3               | 88  | 13.4              | 224 | 14.1              | 419 | 15.6              | 573   | 16.5 |
|            | 30-39 y           | 117 | 34.3              | 196 | 30.7              | 356 | 28.7              | 698 | 24.6              | 1,048 | 21.7 |
|            | 40-49 y           | 121 | 33.4              | 215 | 32.0              | 336 | 31.8              | 549 | 30.6              | 885   | 25.4 |
|            | 50-59 y           | 52  | 14.4              | 123 | 16.1              | 184 | 17.2              | 326 | 20.7              | 514   | 25.0 |
|            | ≥ 60 y            | 35  | 10.6              | 62  | 7.8               | 99  | 8.2               | 164 | 8.5               | 262   | 11.4 |

|                                |     |      |     |      |       |      |       |      |       |      |
|--------------------------------|-----|------|-----|------|-------|------|-------|------|-------|------|
| Education                      |     |      |     |      |       |      |       |      |       |      |
| No Education                   | 6   | 2.0  | 24  | 3.8  | 32    | 2.5  | 32    | 1.8  | 39    | 1.8  |
| Primary                        | 153 | 44.6 | 227 | 40.8 | 385   | 34.2 | 553   | 34.5 | 725   | 32.4 |
| Junior or Senior               | 124 | 37.9 | 210 | 35.6 | 519   | 43.0 | 805   | 42.6 | 1,288 | 45.0 |
| University                     | 68  | 15.5 | 112 | 19.8 | 247   | 20.3 | 386   | 21.1 | 612   | 20.8 |
| Smoking Status                 |     |      |     |      |       |      |       |      |       |      |
| Non-Smoker                     | 163 | 44.9 | 289 | 41.3 | 527   | 44.8 | 897   | 43.6 | 1,481 | 46.5 |
| Smoker                         | 181 | 55.1 | 371 | 58.7 | 651   | 55.2 | 1,212 | 56.4 | 1,779 | 53.5 |
| Marital Status                 |     |      |     |      |       |      |       |      |       |      |
| Never Married                  | 4   | 3.0  | 54  | 8.2  | 131   | 8.6  | 218   | 8.9  | 353   | 9.6  |
| Married                        | 342 | 96.8 | 605 | 90.4 | 1,031 | 89.7 | 1,850 | 88.2 | 2,833 | 87.1 |
| Other                          | 1   | 0.2  | 11  | 1.4  | 22    | 1.7  | 56    | 2.9  | 95    | 3.3  |
| Employment                     |     |      |     |      |       |      |       |      |       |      |
| Not working                    | 34  | 12.4 | 70  | 9.8  | 84    | 7.4  | 165   | 8.7  | 248   | 8.7  |
| Agriculture                    | 27  | 9.9  | 100 | 15.2 | 179   | 15.8 | 328   | 16.1 | 500   | 16.7 |
| Skilled Manual <sup>2</sup>    | 87  | 25.8 | 123 | 19.7 | 199   | 17.5 | 377   | 17.7 | 598   | 18.8 |
| Skilled Labour <sup>3</sup>    | 185 | 51.9 | 366 | 55.4 | 687   | 59.4 | 1,231 | 57.6 | 1,874 | 55.9 |
| Residence                      |     |      |     |      |       |      |       |      |       |      |
| Rural                          | 73  | 33.5 | 211 | 35.7 | 381   | 36.0 | 717   | 39.0 | 987   | 37.4 |
| Urban                          | 279 | 66.5 | 473 | 64.3 | 818   | 64.0 | 1,439 | 61.0 | 2,294 | 62.6 |
| Wealth                         |     |      |     |      |       |      |       |      |       |      |
| Lowest                         | 22  | 7.3  | 82  | 11.8 | 130   | 10.9 | 324   | 15.6 | 547   | 19.9 |
| Second                         | 26  | 6.7  | 88  | 14.1 | 166   | 16.1 | 460   | 23.9 | 562   | 20.1 |
| Middle                         | 61  | 18.7 | 135 | 22.5 | 214   | 19.4 | 304   | 15.5 | 445   | 17.0 |
| Fourth                         | 72  | 20.6 | 118 | 19.7 | 267   | 23.8 | 418   | 22.1 | 554   | 19.9 |
| Highest                        | 169 | 46.6 | 205 | 31.9 | 315   | 29.8 | 418   | 22.9 | 661   | 23.1 |
| Family Size                    |     |      |     |      |       |      |       |      |       |      |
| ≤ 4                            | 128 | 36.9 | 218 | 32.7 | 579   | 50.0 | 712   | 30.9 | 2,061 | 63.9 |
| > 4                            | 224 | 63.1 | 466 | 67.3 | 620   | 50.0 | 1,444 | 69.1 | 1,220 | 36.1 |
| Province                       |     |      |     |      |       |      |       |      |       |      |
| Bali                           | 38  | 16.5 | 70  | 9.7  | 116   | 10.8 | 227   | 14.4 | 369   | 14.0 |
| Central Java                   | 58  | 29.6 | 88  | 20.3 | 162   | 22.6 | 289   | 23.2 | 457   | 24.2 |
| West Java                      | 38  | 17.2 | 100 | 23.2 | 195   | 26.4 | 308   | 20.3 | 433   | 21.0 |
| Other                          | 141 | 23.8 | 313 | 32.7 | 540   | 31.2 | 980   | 34.2 | 1531  | 33.1 |
| Food Expenditures <sup>4</sup> |     |      |     |      |       |      |       |      |       |      |
| Rice                           |     |      |     |      |       |      |       |      |       |      |

|                    |     |      |     |      |     |      |       |      |       |      |
|--------------------|-----|------|-----|------|-----|------|-------|------|-------|------|
| Lowest             | 83  | 43.0 | 365 | 53.5 | 627 | 52.0 | 1,135 | 53.5 | 1,709 | 54.5 |
| Highest            | 103 | 57.0 | 314 | 46.5 | 564 | 48.0 | 1,016 | 46.5 | 1,561 | 45.5 |
| <i>Cooking oil</i> |     |      |     |      |     |      |       |      |       |      |
| Lowest             | 89  | 34.5 | 290 | 43.6 | 525 | 45.2 | 936   | 42.8 | 1,811 | 56.6 |
| Highest            | 203 | 65.5 | 388 | 56.4 | 665 | 54.8 | 1,215 | 57.2 | 1,459 | 43.4 |

<sup>1</sup> Overweight is defined as body mass index  $\geq 25\text{kg/m}^2$ . Percentages are weighted to be representative of the population of Indonesia in the given survey year

<sup>2</sup> Skilled manual labor combines the following employment sectors: mining, manufacturing, electric, gas, water maintenance, and construction

<sup>3</sup> Skilled labor combines the following employment sectors: retail and service, transportation

<sup>4</sup> Represents the household level expenditure on each item as a percentage of the households' total expenditures on food

Nearly equal proportions of boys and girls aged 0-19 years were overweight and a majority had a parent with at least primary school education (Supplemental Tables 1-3). Across all groups, the proportion of overweight children who had an overweight mother increased between 1993 and 2014. The distribution of urban/rural residence among overweight children also changed over time, with more overweight children and adolescents residing in urban areas by 2014 (~60%) compared to 1993. The distribution of wealth among overweight children and adolescents also varied over time, but like adults, by 2014, wealth was almost evenly distributed by quintile (~20%).

### **Distribution of Consumption of Energy-Dense Food and Physical Activity**

Approximately 60% of adults reported consuming instant noodles during the last week in 2014 (Table 3). Likewise, about 65% of adults reported consuming fried snacks, for approximately 4.0 days on average. Smaller proportions of adults regularly consumed fast food or soda (< 10%).

Trends were similar among children. Nearly 60% of children aged 6-59 months consumed instant noodles during the last week, as did three-quarters of children aged 6-12 years (77.5%) and 13-18 years (78.3%). Half (50.4%) of children aged 6-59 months and about two-thirds of children aged 6-18 years regularly consumed fried snacks. Similar proportions of children regularly consumed fast food (~15%), irrespective of age. All age groups of children consumed soda an



average of 2 days per week. Higher proportions of men were engaged in vigorous physical activity (38.0%) compared to women (10.7%). More than half the women and 70% of men reported being engaged in moderate physical activity and walking during the last week. Physical activity levels decreased, among both women and men, between 2007 and 2014 (data not shown).

**Table 3. Distribution and Frequency of Consumption of Energy Dense Foods and Physical Activity in Indonesia, 2014**

|                                      | Women  |           | Men    |           | Children Aged 6 mo-5 years |           | Children Aged 6-12 years |           | Children Aged 13-18 years |           |
|--------------------------------------|--------|-----------|--------|-----------|----------------------------|-----------|--------------------------|-----------|---------------------------|-----------|
|                                      | n      | % or Mean | n      | % or Mean | n                          | % or Mean | n                        | % or Mean | n                         | % or Mean |
| <b>Instant Noodles</b>               |        |           |        |           |                            |           |                          |           |                           |           |
| Last Week <sup>1</sup>               | 9,818  | 60.0      | 8,703  | 63.7      | 2,674                      | 56.8      | 5,467                    | 77.5      | 2,084                     | 78.3      |
| Mean Days <sup>2</sup>               |        | 2.5       |        | 2.6       |                            | 2.7       |                          | 3.0       |                           | 2.9       |
| <b>Fast Food</b>                     |        |           |        |           |                            |           |                          |           |                           |           |
| Last Week <sup>1</sup>               | 1,718  | 9.0       | 1,291  | 8.8       | 685                        | 14.5      | 1,357                    | 18.8      | 450                       | 16.3      |
| Mean Days <sup>2</sup>               |        | 1.8       |        | 1.7       |                            | 2.4       |                          | 2.5       |                           | 2.1       |
| <b>Soda</b>                          |        |           |        |           |                            |           |                          |           |                           |           |
| Last Week <sup>1</sup>               | 1,956  | 10.7      | 3,281  | 22.6      | 278                        | 5.0       | 1,075                    | 14.5      | 647                       | 23.0      |
| Mean Days <sup>2</sup>               |        | 1.8       |        | 2.0       |                            | 2.0       |                          | 2.1       |                           | 2.0       |
| <b>Fried Snacks</b>                  |        |           |        |           |                            |           |                          |           |                           |           |
| Last Week <sup>1</sup>               | 9,706  | 65.4      | 8,668  | 68.8      | 2,282                      | 50.4      | 4,530                    | 66.4      | 1,841                     | 72.0      |
| Mean Days <sup>2</sup>               |        | 4.0       |        | 3.9       |                            | 3.3       |                          | 3.9       |                           | 4.1       |
| <b>Vigorous Activity<sup>1</sup></b> |        |           |        |           |                            |           |                          |           |                           |           |
| Last Week <sup>1</sup>               | 15,191 | 10.7      | 13,148 | 38.0      |                            | na        |                          | na        |                           | na        |
| Mean Days <sup>2</sup>               |        | 3.9       |        | 4.2       |                            | na        |                          | na        |                           | na        |
| <b>Moderate Activity<sup>1</sup></b> |        |           |        |           |                            |           |                          |           |                           |           |
| Last Week <sup>1</sup>               | 15,191 | 58.1      | 13,148 | 54.2      |                            | na        |                          | na        |                           | na        |
| Mean Days <sup>2</sup>               |        | 4.8       |        | 4.4       |                            | na        |                          | na        |                           | na        |
| <b>Walking</b>                       |        |           |        |           |                            |           |                          |           |                           |           |

|                        |        |      |        |      |    |    |    |
|------------------------|--------|------|--------|------|----|----|----|
| Last Week <sup>1</sup> | 15,191 | 68.8 | 13,148 | 72.4 | na | na | na |
| Mean Days <sup>2</sup> |        | 5.1  |        | 5.1  | na | na | na |

na = not applicable

<sup>1</sup> Percent distribution, weighted to be representative of the population of Indonesia in the given survey year. n represents the number of respondents that consumed a particular item during the last week.

<sup>2</sup> The average number of days consumed is queried if the respondent reported that consumed in the last week. Weighted to be representative of the population of Indonesia in the given survey year.

<sup>3</sup> Defined using the International Physical Activity Questionnaire. Respondents are asked about each type of physical activity (i.e. vigorous, moderate, walking) separately and therefore, should be interpreted as mutually exclusive categories. Weighted to be representative of the population of Indonesia in the given survey year.

## Regression-based Analyses Among Adults

Figure 2 summarizes all associations between hypothesized risk factors and overweight in multivariate models among adults and children. Among women, older age, higher education, living in an urban area, and higher household wealth status predicted overweight (Table 4). Married women, versus never married, also had higher odds of overweight (odds ratio [OR]=2.39; 95% confidence interval [CI]: 1.88, 2.98). Working in a skilled labor position, versus not working, was associated with 17% higher odds of overweight among women (OR=1.17; 95% CI: 1.04, 1.33) whereas working in agriculture-based labor, a physically demanding occupation, was associated with an approximately 30% lower odds of overweight (OR=0.66; 95% CI: 0.56, 0.78). Household expenditures on cooking oil (OR=1.24; 95% CI: 1.12, 1.38) and individual's consumption of fried snacks (versus no consumption) (OR=1.12; 95% CI: 1.00, 1.25) was associated with higher odds of overweight.

**Table 4. Multivariate Logistic Regression Investigating the Association Between Selected Characteristics and Overweight Among Adults Aged 19 + in Indonesia in 2014**

|     | Women <sup>1,2</sup> |                     |                     | Men <sup>1,2</sup>  |                     |
|-----|----------------------|---------------------|---------------------|---------------------|---------------------|
|     | n                    | Odds Ratio (95% CI) | n                   | Odds Ratio (95% CI) |                     |
|     | N=9,073              |                     |                     | N=5,775             |                     |
| Age |                      |                     |                     |                     |                     |
|     | 19-29 y              | 2,403               | Reference           | 1,441               | Reference           |
|     | 30-39 y              | 2,630               | 2.03 (1.75, 2.34) * | 1,807               | 1.79 (1.40, 2.30) * |
|     | 40-49 y              | 1,943               | 2.83 (2.41, 3.31) * | 1,320               | 2.37 (1.83, 3.08) * |
|     | 50-59 y              | 1,357               | 2.36 (1.97, 2.83) * | 719                 | 2.37 (1.76, 3.20) * |

|                                       |                             |       |                     |       |                     |
|---------------------------------------|-----------------------------|-------|---------------------|-------|---------------------|
|                                       | 60+ y                       | 740   | 1.68 (1.34, 2.12) * | 488   | 0.92 (0.62, 1.36)   |
| <b>Education</b>                      |                             |       |                     |       |                     |
|                                       | No Education                | 511   | Reference           | 106   | Reference           |
|                                       | Primary                     | 3,562 | 2.04 (1.59, 2.60) * | 2,029 | 1.76 (0.87, 3.57)   |
|                                       | Junior or Senior            | 3,809 | 1.89 (1.46, 2.46) * | 2,854 | 2.47 (1.21, 5.04) * |
|                                       | University                  | 1,191 | 1.67 (1.24, 2.26) * | 786   | 3.66 (1.75, 7.65) * |
| <b>Smoking Status</b>                 |                             |       |                     |       |                     |
|                                       | Non-Smoker                  | 8,881 | Reference           | 1,849 | Reference           |
|                                       | Smoker                      | 192   | 0.78 (0.55, 1.10)   | 3,926 | 0.51 (0.43, 0.60) * |
| <b>Marital Status</b>                 |                             |       |                     |       |                     |
|                                       | Never Married               | 683   | Reference           | 774   | Reference           |
|                                       | Married                     | 7,909 | 2.39 (1.88, 2.98) * | 4,931 | 2.04 (1.48, 2.82) * |
|                                       | Other                       | 481   | 1.54 (1.10, 2.15) * | 70    | 1.59 (0.77, 3.27)   |
| <b>Employment</b>                     |                             |       |                     |       |                     |
|                                       | Not Working                 | 3,227 | Reference           | 371   | Reference           |
|                                       | Agriculture                 | 1,585 | 0.66 (0.56, 0.78) * | 1,483 | 0.50 (0.35, 0.73) * |
|                                       | Skilled Manual <sup>3</sup> | 794   | 0.92 (0.76, 1.12)   | 1,290 | 0.73 (0.51, 1.06)   |
|                                       | Skilled <sup>4</sup>        | 3,466 | 1.17 (1.04, 1.33) * | 2,631 | 1.15 (0.82, 1.61)   |
| <b>Physical Activity<sup>5</sup>:</b> |                             |       |                     |       |                     |
|                                       | No Vigorous Activity        |       | na                  | 3,624 | Reference           |
|                                       | Vigorous Activity           |       | na                  | 2,151 | 0.93 (0.79, 1.10)   |
|                                       | No Moderate Activity        | 3,663 | Reference           |       | na                  |
|                                       | Moderate Activity           | 5,410 | 1.10 (0.99, 1.22)   |       | na                  |
| <b>Consumed in the Last Week:</b>     |                             |       |                     |       |                     |
| <i>Instant Noodles</i>                |                             |       |                     |       |                     |
|                                       | No                          | 3,218 | Reference           |       | na                  |
|                                       | Yes                         | 5,855 | 1.10 (0.98, 1.25)   |       | na                  |
| <i>Fast Food</i>                      |                             |       |                     |       |                     |
|                                       | No                          | 8,116 | Reference           | 5,172 | Reference           |
|                                       | Yes                         | 957   | 1.02 (0.85, 1.27)   | 603   | 1.34 (1.06, 1.69) * |
| <i>Soda</i>                           |                             |       |                     |       |                     |
|                                       | No                          |       | na                  | 4,196 | Reference           |
|                                       | Yes                         |       | na                  | 1,579 | 1.10 (0.92, 1.30)   |

|                                                              |                 |       |                     |           |       |                     |
|--------------------------------------------------------------|-----------------|-------|---------------------|-----------|-------|---------------------|
| <i>Fried Snacks</i>                                          |                 |       |                     |           |       |                     |
|                                                              | No              | 3,236 |                     | Reference | 1,782 | Reference           |
|                                                              | Yes             | 5,837 | 1.12 (1.00, 1.25) * |           | 3,993 | 1.06 (0.89, 1.25)   |
| Mean Number of Days Consumed in the Last Week <sup>6</sup> : |                 |       |                     |           |       |                     |
|                                                              | Instant Noodles |       | na                  |           | 5,775 | 0.99 (0.95, 1.04)   |
| Household Level Food Expenditures <sup>7</sup>               |                 |       |                     |           |       |                     |
| <i>Rice</i>                                                  |                 |       |                     |           |       |                     |
|                                                              | Lowest          | 4,408 |                     | Reference |       | na                  |
|                                                              | Highest         | 4,665 | 1.02 (0.91, 1.13)   |           |       | na                  |
| <i>Cooking oil</i>                                           |                 |       |                     |           |       |                     |
|                                                              | Lowest          | 5,256 |                     | Reference | 3,378 | Reference           |
|                                                              | Highest         | 3,817 | 1.24 (1.12, 1.38) * |           | 2,397 | 1.19 (1.02, 1.39) * |
| Residence                                                    |                 |       |                     |           |       |                     |
|                                                              | Rural           | 3,803 |                     | Reference | 2,401 | Reference           |
|                                                              | Urban           | 5,270 | 1.21 (1.08, 1.35) * |           | 3,374 | 1.26 (1.06, 1.50) * |
| Wealth                                                       |                 |       |                     |           |       |                     |
|                                                              | Lowest          | 2,289 |                     | Reference | 1,354 | Reference           |
|                                                              | Second          | 2,017 | 1.23 (1.06, 1.44) * |           | 1,271 | 0.95 (0.76, 1.20)   |
|                                                              | Middle          | 1,455 | 1.23 (1.03, 1.45) * |           | 964   | 0.99 (0.77, 1.26)   |
|                                                              | Fourth          | 1,696 | 1.06 (0.90, 1.25)   |           | 1,127 | 1.06 (0.84, 1.34)   |
|                                                              | Highest         | 1,616 | 1.12 (0.95, 1.32)   |           | 1,059 | 1.17 (0.92, 1.48)   |

CI = confidence interval, na = not applicable, not included in multivariate model

<sup>1</sup> Overweight is defined as BMI  $\geq$  25 kg/m<sup>2</sup>

<sup>2</sup> Odds ratios and confidence intervals are estimated using logistic regression and are weighted to account for the survey design. Pregnant women are excluded

<sup>3</sup> Skilled manual labor combines the following employment sectors: mining, manufacturing, electric, gas, water maintenance, and construction

<sup>4</sup> Skilled labor combines the following employment sectors: retail and service, transportation

<sup>5</sup> Defined using the International Physical Activity Questionnaire

<sup>6</sup> Modelled as a continuous variable, the average number of days consumed is queried if the respondent reported that they consumed item during the last week

<sup>7</sup> Indicates the household level expenditure on each item as a percentage of the households' total expenditures on food

\*  $p < 0.05$

Similarly, among men, older age, higher educational attainment, and living in an urban area were associated with higher overweight (Table 4). Wealth was not associated with overweight among men. Married men, versus never married, had two-fold higher odds of overweight

(OR=2.04; 95% CI: 1.48, 2.82). Consuming fast food, compared to not consuming fast food, was associated with 34% higher odds of overweight among men (OR=1.34; 95% CI: 1.06, 1.69). Current smokers (versus non-smokers) (OR=0.50; 95% CI: 0.43, 0.60) and men who had an agriculture-based occupation (versus not working) (OR=0.50; 95% CI: 0.35, 0.73) had 50% lower odds of overweight. Results were similar when investigating associations among adults in multivariate, longitudinal models (Supplemental Tables 4 and 5).

### Regression-based Analyses Among Children

In multivariate models for children aged 6 months to 5 years, consuming fast food (OR=1.48; 95% CI: 1.00, 2.19), urban residence (OR=1.64; 95% CI: 1.14, 2.35) and higher household wealth (OR=1.70; 95% CI: 1.03, 2.81) were associated with higher odds of overweight (Table 5). Among children aged 6-12 years, every 1-year increase in age was associated with 6% higher odds of overweight (OR=1.06; 95% CI: 1.01, 1.11). Having an overweight mother (OR=1.92; 95% CI: 1.59, 2.32), living in an urban area (OR=1.55; 95% CI: 1.26, 1.91), and higher household wealth status was associated with higher odds of overweight. On the contrary, parental employment in agriculture-based (OR=0.61; 95% CI: 0.44, 0.85) or skilled manual labor (OR=0.50; 95% CI: 0.33, 0.74) and living in households with > 4 people (OR=0.82; 95% CI: 0.68, 0.99) was associated with lower odds of overweight.

Having an overweight mother was associated with 92% higher odds of being overweight among adolescents (OR=1.92; 95% CI: 1.53, 2.43). Living in an urban area also predicted higher odds of overweight among this age group (OR=1.74; 95% CI: 1.33, 2.27). On the contrary, having a parent employed in agriculture-based labor (OR=0.64; 95% CI: 0.43, 0.96), skilled manual labor (OR=0.52; 95% CI: 0.33, 0.83) or skilled labor (OR=0.70; 95% CI: 0.53, 0.91), compared to not working, was associated with lower odds of overweight among adolescents.

**Table 5. Multivariate Logistic Regression Models Investigating the Association Between Selected Characteristics and Overweight Among Children in Indonesia, 2014**

|                                  | 6 months - 5 years <sup>1</sup> |                                   | 6 – 12 years <sup>2</sup> |                                   | 13 – 18 years <sup>2</sup> |                                   |
|----------------------------------|---------------------------------|-----------------------------------|---------------------------|-----------------------------------|----------------------------|-----------------------------------|
|                                  | n                               | Odds Ratio<br>(95% CI)<br>N=3,424 | n                         | Odds Ratio<br>(95% CI)<br>N=4,791 | n                          | Odds Ratio<br>(95% CI)<br>N=3,186 |
| Mean Age <sup>3</sup>            | 3,424                           | 1.01 (0.88, 1.16)                 | 4,791                     | 1.06 (1.01, 1.11) *               | 3,186                      | 0.84 (0.79, 0.91) *               |
| Gender                           |                                 |                                   |                           |                                   |                            |                                   |
| Boys                             | 1,767                           | Reference                         | 2,455                     | Reference                         | 1,648                      | Reference                         |
| Girls                            | 1,657                           | 0.78 (0.58, 1.08)                 | 2,336                     | 0.96 (0.79, 1.15)                 | 1,538                      | 1.06 (0.85, 1.33)                 |
| Parental Education <sup>4</sup>  |                                 |                                   |                           |                                   |                            |                                   |
| No Education                     | 188                             | Reference                         | 313                       | Reference                         | 264                        | Reference                         |
| Primary                          | 1,234                           | 0.97 (0.40, 2.36)                 | 1,980                     | 0.73 (0.48, 1.11)                 | 1,505                      | 1.01 (0.62, 1.66)                 |
| Junior or Senior                 | 1,568                           | 1.12 (0.47, 2.65)                 | 1,997                     | 0.84 (0.55, 1.27)                 | 1,173                      | 1.18 (0.71, 1.94)                 |
| University                       | 434                             | 1.12 (0.44, 2.87)                 | 501                       | 1.34 (0.84, 2.14)                 | 244                        | 1.38 (0.76, 2.49)                 |
| Parental Employment <sup>4</sup> |                                 |                                   |                           |                                   |                            |                                   |
| Not Working                      | 1,780                           | Reference                         | 1,989                     | Reference                         | 1,239                      | Reference                         |
| Agriculture                      | 433                             | 0.61 (0.31, 1.21)                 | 821                       | 0.61 (0.44, 0.85) *               | 581                        | 0.64 (0.43, 0.96) *               |
| Skilled Manual <sup>5</sup>      | 208                             | 0.98 (0.52, 1.84)                 | 371                       | 0.50 (0.33, 0.74) *               | 264                        | 0.52 (0.33, 0.83) *               |
| Skilled <sup>6</sup>             | 1,003                           | 1.15 (0.82, 1.63)                 | 1,610                     | 0.91 (0.73, 1.13)                 | 1,102                      | 0.70 (0.53, 0.91) *               |
| Maternal Overweight              |                                 |                                   |                           |                                   |                            |                                   |
| Not Overweight                   | 2,238                           | Reference                         | 2,894                     | Reference                         | 1,834                      | Reference                         |
| Overweight                       | 1,186                           | 1.20 (0.89, 1.62)                 | 1,897                     | 1.92 (1.59, 2.32) *               | 1,352                      | 1.92 (1.53, 2.43) *               |
| Consumed in the Last Week:       |                                 |                                   |                           |                                   |                            |                                   |
| <i>Instant Noodles</i>           |                                 |                                   |                           |                                   |                            |                                   |
| No                               | 1,525                           | Reference                         |                           | na                                |                            | na                                |
| Yes                              | 1,899                           | 0.79 (0.57, 1.11)                 |                           | na                                |                            | na                                |

|                    |         |       |                        |       |                     |       |                     |
|--------------------|---------|-------|------------------------|-------|---------------------|-------|---------------------|
| <i>Fast Food</i>   |         |       |                        |       |                     |       |                     |
|                    | No      | 2,952 | Reference              | 3,909 | Reference           |       | na                  |
|                    | Yes     | 472   | 1.48 (1.00, 2.19) *    | 882   | 1.16 (0.93, 1.45)   |       | na                  |
| <i>Residence</i>   |         |       |                        |       |                     |       |                     |
|                    | Rural   | 1,478 | Reference              | 2,053 | Reference           | 1,323 | Reference           |
|                    | Urban   | 1,946 | 1.64 (1.14, 2.35) *    | 2,738 | 1.55 (1.26, 1.91) * | 1,863 | 1.74 (1.33, 2.27) * |
| <i>Wealth</i>      |         |       |                        |       |                     |       |                     |
|                    | Lowest  | 830   | Reference <sup>7</sup> | 1,109 | Reference           | 799   | Reference           |
|                    | Second  | 807   | 1.54 (0.94, 2.53)      | 1,056 | 1.43 (1.06, 1.92) * | 735   | 1.11 (0.80, 1.54)   |
|                    | Middle  | 565   | 1.43 (0.83, 2.48)      | 812   | 1.73 (1.26, 2.36) * | 513   | 0.95 (0.66, 1.37)   |
|                    | Fourth  | 671   | 1.70 (1.03, 2.81) *    | 931   | 1.45 (1.07, 1.95) * | 574   | 0.95 (0.65, 1.37)   |
|                    | Highest | 551   | 1.61 (0.96, 2.70)      | 883   | 1.55 (1.14, 2.11) * | 565   | 0.94 (0.66, 1.33)   |
| <i>Family Size</i> |         |       |                        |       |                     |       |                     |
|                    | ≤ 4     |       | na                     | 2,105 | Reference           | 1,225 | Reference           |
|                    | > 4     |       | na                     | 2,686 | 0.82 (0.68, 0.99) * | 1,961 | 0.87 (0.69, 1.10)   |

CI = confidence interval, na= not applicable, not included in multivariate model  
<sup>1</sup> Overweight is defined as weight-for-height z-score > 2 using the MGRS Standard, estimated using logistic regression models and are weighted to account for the survey design  
<sup>2</sup> Overweight is defined BMI z-score > 1 using the WHO reference, estimated using logistic regression models and weighted to account for the survey design  
<sup>3</sup> Modelled as a continuous variable  
<sup>4</sup> Parental characteristics are of the mother, when available. When not available the characteristic is based on the father’s data.  
<sup>5</sup> Skilled manual labor combines the following employment sectors: mining, manufacturing, electric, gas, water maintenance, and construction  
<sup>6</sup> Skilled labor combines the following employment sectors: retail and service, transportation  
<sup>7</sup> Wealth was not significant in univariate model but is included in the multivariate model due to previously-established associations  
\* p < 0.05

## DISCUSSION

Overweight, now considered a global pandemic, has increased in Indonesia over the last several decades and it persists among all age-groups. One-third of adults in Indonesia were overweight in 2014 and women consistently had a higher overweight prevalence compared to men. Between 1993 and 2014 the prevalence of overweight increased by 100% and 88%, among women and men, respectively. Similarly, among children and adolescents, the prevalence of overweight increased by more than 100% between 1993 and 2014. In 2014, 7.5% of children aged 0-5 years were overweight, as were 16% of school-age children and 14% of adolescents. In younger-aged children, boys had a slightly higher prevalence of overweight, whereas among adolescents, overweight prevalence was similar by gender (in 2014). In addition, among overweight individuals, the distribution of education, wealth, employment status, and urban/rural residence changed. Over the past two decades, more rural than urban residents became overweight, and in 2014, the proportions of overweight adults were evenly distributed among across wealth quintiles.

Consistent with prior literature, living in an urban area, higher wealth, higher education, and consumption of energy-dense foods were associated with higher odds of overweight [5,14]. Several other analyses have also reported higher rates of overweight in urban areas in lower-income countries [15,16] and in Indonesia specifically [17–20]. Urbanization alters supply-side factors, such as the food system and the rapid spread of supermarkets in low- and middle-income countries (LMIC), which makes low-cost, convenient, and highly processed foods more available and accessible [21–23]. Simulations suggest that a shift in the urban population from 25% to 75% is associated with a 4-percentage point increase of total energy from fat and an additional 12-percentage points of energy from sugar [24]. In addition, urbanization leads to lower physical activity, in part because occupations become more sedentary.



1  
2  
3 Among both men and women, higher education was associated with higher odds of  
4 overweight. Additionally, higher wealth was associated with 25% higher odds of being overweight  
5 among women and a 70%, 55%, and 74% higher odds of overweight among young children,  
6 school-age children, and adolescents, respectively. Higher education [5] and higher wealth or  
7 income [5,17] have been shown to be associated with higher overweight among adults and children  
8 in prior studies conducted in Indonesia. But importantly, descriptive statistics in our study also  
9 show a growing prevalence of overweight among lower-wealth groups. For example, among  
10 women, the percent of overweight women in the poorest and second wealth quintile grew by 60%  
11 and 120%, respectively, compared to higher wealth quintiles where the percent of overweight  
12 women decreased over time. This is consistent with prior studies, which have documented an  
13 increasing burden of overweight among women with lower education and in poorer households in  
14 Indonesia and other LMIC [25–28].  
15  
16  
17  
18  
19  
20  
21  
22  
23  
24  
25  
26  
27  
28  
29  
30

31 For both adults and children, consuming energy-dense foods (instant noodles, fried snacks,  
32 fast food) was associated with higher odds of overweight. Prior literature on the consumption of  
33 energy-dense foods in Indonesia is limited. But these results are generally consistent with findings  
34 that reported that the percent of total energy coming from fat has increased in this context [17,29]  
35 and one recent survey conducted in Asia that suggested the consumption of energy-dense or  
36 processed foods is widespread [4].  
37  
38  
39  
40  
41  
42  
43  
44

45 Results are also consistent with prior literature, which finds that maternal employment is  
46 associated with overweight in LMIC, both among women and their children [30,31]. In this  
47 sample, skilled occupations were associated with higher odds of overweight whereas agriculture-  
48 based employment was associated with lower odds of overweight. This is likely related to  
49 occupation-related physical activity; Monda and colleagues provide empirical evidence of a  
50  
51  
52  
53  
54  
55  
56  
57  
58  
59  
60

1  
2  
3 reduction in the intensity of occupational activity with economic development in China [32]. In  
4 fact, reduced physical activity likely represents the most important cause of the rapid overweight  
5 increases between 1990 and 2010 in most LMIC (with dietary factors playing a more major role  
6 from 2010-present) [33].  
7  
8  
9  
10  
11

12  
13 Similar to our results, Rachmi and colleagues report that overweight prevalence is higher  
14 among younger-aged boys versus girls in Indonesia [5]. Finally, having an overweight mother was  
15 strongly associated with higher odds of overweight among school-age children and adolescents.  
16 Although the importance of intergenerational nutrition is often a concern for undernutrition, it  
17 warrants consideration for overnutrition as well. Pre-pregnancy maternal overweight puts infants  
18 at increased risk of being born large-for-gestational-age and subsequently overweight during  
19 childhood [34–39]. A child born to a mother who is overweight is twice as likely to be overweight  
20 as a child, compared to a child whose mother was normal weight [37,38].  
21  
22  
23  
24  
25  
26  
27  
28  
29  
30

31  
32 Our findings call for urgent action to mitigate overweight among all age-groups in  
33 Indonesia. Combined approaches targeting to improve the enabling environment, supply and  
34 demand sides are warranted, which includes enhancing the food environment, food system, and  
35 effective social behavior change communication [40,41]. Fiscal measures, such as food- and  
36 beverage-related taxes, to reduce the consumption of unhealthy items and subsidies for fruits and  
37 vegetables production and consumption, may be effective in improving the overall food  
38 environment [41–44]. Regulatory (or even voluntary) measures to control warning labelling  
39 systems and marketing of unhealthy foods and beverages may also improve the obesogenic  
40 environment [41,45,46]. It is also important to address overweight early, as child and adolescent  
41 obesity tracks into adulthood [47,48]; interventions aimed at improving nutrition literacy and  
42 eating and physical activity behaviors through school-based nutrition education and effective  
43  
44  
45  
46  
47  
48  
49  
50  
51  
52  
53  
54  
55  
56  
57  
58  
59  
60

1  
2  
3 social and behavior change communication to mobilize the support of the entire community also  
4 warrant consideration [41,49,50]. Finally, multi-sectoral engagement and efforts are required to  
5  
6 holistically tackle the obesity epidemic through a food systems approach.  
7  
8  
9

10 These findings and recommendations should be interpreted while keeping in mind the  
11 limitations of our study. First, we largely employ cross-sectional data, therefore, we cannot infer  
12 any causal associations and there may be unmeasured confounding. Data on the consumption of a  
13 select number of energy-dense foods was only collected in 2014, which limits our ability to make  
14 conclusions about the association between energy-dense foods and overweight. Breastfeeding and  
15 complementary feeding practices were not assessed following the standard methods. Physical  
16 activity levels were based on respondent recall. Finally, these findings may not be generalizable  
17 beyond Indonesia. Despite some limitations, we are able to compare overweight trends over time  
18 among all age groups, explore the consumption of energy-dense foods and physical activity, and  
19 investigate hypothesized risk factors for overweight using regression-based methods, using a  
20 recent dataset that is nationally representative of Indonesia.  
21  
22  
23  
24  
25  
26  
27  
28  
29  
30  
31  
32  
33  
34  
35

36 Indonesia is undergoing nutrition transition, as evidenced by the increasing prevalence of  
37 overweight, the ubiquitous consumption of energy-dense foods, and decreasing levels of physical  
38 activity. These data suggest urgent program and policy action is needed to reduce and prevent  
39 overweight among all age groups. In addition, these data highlight the need for prevention  
40 strategies that also target men and boys, as well as the increasing prevalence of overweight among  
41 rural and poorer populations. A multipronged strategy is warranted employing multi-sectoral,  
42 multi-stakeholder actions and solutions to strengthen health systems and foster an enabling  
43 environment, improve the supply-related issues including the availability and quality of relevant  
44 services, and enhance knowledge and cultivate demand for services.  
45  
46  
47  
48  
49  
50  
51  
52  
53  
54  
55  
56  
57  
58  
59  
60

## Acknowledgments

The authors wish to thank Paul Pronyk for his insightful comments on the manuscript.

## Funding

This research received no specific grant from any funding agency in the public, commercial or not-for-profit sectors.

## Conflict of Interest Statement

The authors do not have any conflicts of interest to declare.

## Author Contributions

The authors' responsibilities were as follows: VMO performed the statistical analysis and wrote the paper. All authors designed the research, developed the research plan, and had responsibility for the final content.

## Data Statement

Data are publicly available at <https://www.rand.org/well-being/social-and-behavioral-policy/data/FLS/IFLS.html>

## REFERENCES

- 1 Popkin BM, Gordon-Larsen P. The nutrition transition: worldwide obesity dynamics and their determinants. *Int J Obes* 2004;**28**:S2–9.
- 2 Popkin BM, Adair LS, Ng SW. Global nutrition transition and the pandemic of obesity in developing countries. *Nutr Rev* 2012;**70**:3–21.
- 3 Shrimpton R, Rokx C. The double burden of malnutrition in Indonesia. Jakarta, Indonesia: 2013. <https://openknowledge.worldbank.org/handle/10986/17007>
- 4 Economist Intelligence Unit. Tackling obesity in ASEAN Prevalence, Impact, and Guidance on Interventions. 2017. <https://foodindustry.asia/documentdownload.axd?documentresourceid=30157>
- 5 Rachmi CN, Li M, Baur LA. Overweight and obesity in Indonesia: prevalence and risk factors—a literature review. *Public Health* 2017;**147**:20–9.
- 6 Prihantini S, Jahari AB. Risk factors of obesity in school children age 6–18 years in DKI Jakarta. *Penelit Dizi Dan Makanan* 2007;**30**:32–40.
- 7 Strauss J, Witoelar F, Sikoki B. The fifth wave of the Indonesia family life survey: overview and field report. *RAND St Monica, CA, USA* 2016.
- 8 de Onis M, Onyango AW, Borghi E, *et al.* Development of a WHO growth reference for school-aged children and adolescents. *Bull World Health Organ* 2007;**85**:660–7.
- 9 Group WHOMGRS. WHO Child Growth Standards based on length/height, weight and age. *Acta Paediatr (Oslo, Norw 1992)Supplement* 2006;**450**:76–85.
- 10 Kumanyika S, Jeffery RW, Morabia A, *et al.* Obesity prevention: the case for action. *Int J Obes* 2002;**26**:425.
- 11 Vandebroek P, Goossens J, Clemens M. Foresight-Tackling Obesities: Future Choices – Building the Obesity System Map. London, UK: 2007. [https://assets.publishing.service.gov.uk/government/uploads/system/uploads/attachment\\_data/file/295154/07-1179-obesity-building-system-map.pdf](https://assets.publishing.service.gov.uk/government/uploads/system/uploads/attachment_data/file/295154/07-1179-obesity-building-system-map.pdf)
- 12 Swinburn BA, Sacks G, Hall KD, *et al.* The global obesity pandemic: shaped by global drivers and local environments. *Lancet* 2011;**378**:804–14.
- 13 Zou G. A modified poisson regression approach to prospective studies with binary data. *Am J Epidemiol* 2004;**159**:702–6.
- 14 Pengpid S, Peltzer K. The Prevalence of Underweight, Overweight/Obesity and Their Related Lifestyle Factors in Indonesia, 2014–2015. *AIMS public Heal* 2017;**4**:633.
- 15 Mendez MA, Monteiro CA, Popkin BM. Overweight exceeds underweight among women in most developing countries. *Am J Clin Nutr* 2005;**81**:714–21. <http://ajcn.nutrition.org/content/81/3/714.full.pdf>
- 16 Jaacks LM, Slining MM, Popkin BM. Recent underweight and overweight trends by rural-urban residence among women in low- and middle-income countries. *J Nutr* 2015;**145**:352–7. doi:10.3945/jn.114.203562 [doi]
- 17 Roemling C, Qaim M. Obesity trends and determinants in Indonesia. *Appetite*

- 2012;**58**:1005–13.
- 18 Susilowati D. The relationship between overweight and socio demographic status among adolescent girls in Indonesia. *Bul Penelit Sist Kesehat* 2011;**14**.
- 19 Sari K, Mansyur M. Female, live in urban, and the existence of a caregiver increased risk overnutrition in elderly: an Indonesian national study 2010. *Heal Sci J Indones* 2012;**3**:9–14.
- 20 Diana R, Yuliana I, Yasmin G, *et al*. Risk Factors of Overweight among Indonesian Women. *J Gizi dan Pangan* 2013;**8**:1–8.
- 21 Kennedy G, Nantel G, Shetty P. Globalization of food systems in developing countries: a synthesis of country case studies. *Glob food Syst Dev Ctries impact food Secur Nutr* 2004;**83**.
- 22 Monteiro CA, Levy RB, Claro RM, *et al*. Increasing consumption of ultra-processed foods and likely impact on human health: evidence from Brazil. *Public Health Nutr* 2011;**14**:5–13.
- 23 Popkin BM, Conde W, Hou N, *et al*. Is there a lag globally in overweight trends for children compared with adults? *Obesity* 2006;**14**:1846–53.
- 24 Popkin BM. Urbanization, lifestyle changes and the nutrition transition. *World Dev* 1999;**27**:1905–16.
- 25 Jones-Smith JC, Gordon-Larsen P, Siddiqi A, *et al*. Cross-national comparisons of time trends in overweight inequality by socioeconomic status among women using repeated cross-sectional surveys from 37 developing countries, 1989–2007. *Am J Epidemiol* 2011;**173**:667–75. doi:10.1093/aje/kwq428; 10.1093/aje/kwq428
- 26 Jones-Smith JC, Gordon-Larsen P, Siddiqi A, *et al*. Is the burden of overweight shifting to the poor across the globe? Time trends among women in 39 low-and middle-income countries (1991–2008). *Int J Obes* 2012;**36**:1114–20. <http://www.nature.com/ijo/journal/v36/n8/pdf/ijo2011179a.pdf>
- 27 Masood M, Reidpath DD. Effect of national wealth on BMI: An analysis of 206,266 individuals in 70 low-, middle-and high-income countries. *PLoS One* 2017;**12**:e0178928.
- 28 Monteiro CA, Moura EC, Conde WL, *et al*. Socioeconomic status and obesity in adult populations of developing countries: a review. *Bull World Health Organ* 2004;**82**:940–6.
- 29 Lipoeto NI, Wattanapenpaiboon N, Malik A, *et al*. Nutrition transition in west Sumatra, Indonesia. *Asia Pac J Clin Nutr* 2004;**13**.
- 30 Oddo VM, Bleich SN, Pollack KM, *et al*. The weight of work: the association between maternal employment and overweight in low-and middle-income countries. *Int J Behav Nutr Phys Act* 2017;**14**:66.
- 31 Oddo VM, Mueller NT, Pollack KM, *et al*. Maternal Employment and Childhood Overweight in Low- and Middle-Income Countries. *Public Health Nutr*
- 32 Monda KL, Gordon-Larsen P, Stevens J, *et al*. China's transition: the effect of rapid urbanization on adult occupational physical activity. *Soc Sci Med* 2007;**64**:858–70.
- 33 Church TS, Thomas DM, Tudor-Locke C, *et al*. Trends over 5 decades in US occupation-related physical activity and their associations with obesity. *PLoS One* 2011;**6**:e19657.



- 1  
2  
3 34 Deierlein AL, Siega-Riz AM, Adair LS, *et al.* Effects of pre-pregnancy body mass index  
4 and gestational weight gain on infant anthropometric outcomes. *J Pediatr* 2011;**158**:221–  
5 6.
- 7 35 Skilton MR, Siitonen N, Wurtz P, *et al.* High birth weight is associated with obesity and  
8 increased carotid wall thickness in young adults: the cardiovascular risk in young Finns  
9 study. *Arterioscler Thromb Vasc Biol* 2014;**34**:1064–8.  
10 doi:10.1161/ATVBAHA.113.302934 [doi]
- 11 36 Yu Z, Han S, Zhu J, *et al.* Pre-pregnancy body mass index in relation to infant birth  
12 weight and offspring overweight/obesity: a systematic review and meta-analysis. *PLoS*  
13 *One* 2013;**8**:e61627. doi:10.1371/journal.pone.0061627; 10.1371/journal.pone.0061627
- 14 37 Whitaker KL, Jarvis MJ, Beeken RJ, *et al.* Comparing maternal and paternal  
15 intergenerational transmission of obesity risk in a large population-based sample-. *Am J*  
16 *Clin Nutr* 2010;**91**:1560–7.
- 17 38 Murrin CM, Kelly GE, Tremblay RE, *et al.* Body mass index and height over three  
18 generations: evidence from the Lifeways cross-generational cohort study. *BMC Public*  
19 *Health* 2012;**12**:81.
- 20 39 Ehrenberg HM, Mercer BM, Catalano PM. The influence of obesity and diabetes on the  
21 prevalence of macrosomia. *Am J Obstet Gynecol* 2004;**191**:964–8.
- 22 40 Hawkes C, Jewell J, Allen K. A food policy package for healthy diets and the prevention  
23 of obesity and diet-related non-communicable diseases: the NOURISHING framework.  
24 *Obes Rev* 2013;**14**:159–68.
- 25 41 World Cancer Research Fund International. NOURISHING framework.  
26 2018.<http://www.wcrf.org/int/policy/nourishing-framework> (accessed 26 Mar 2019).
- 27 42 Grogger J. Soda taxes and the prices of sodas and other drinks: Evidence from Mexico.  
28 *Am J Agric Econ* 2017;**99**:481–98. doi:10.1093/ajae/aax024
- 29 43 Colchero MA, Rivera-Dommarco J, Popkin BM, *et al.* In Mexico, Evidence Of Sustained  
30 Consumer Response Two Years After Implementing A Sugar-Sweetened Beverage Tax.  
31 *Health Aff (Millwood)* 2017;**36**:564–71. doi:10.1377/hlthaff.2016.1231
- 32 44 An R. Effectiveness of subsidies in promoting healthy food purchases and consumption: a  
33 review of field experiments. *Public Health Nutr* 2013;**16**:1215.
- 34 45 Lee Y, Yoon J, Chung S-J, *et al.* Effect of TV food advertising restriction on food  
35 environment for children in South Korea. *Health Promot Int* 2013;**32**:25–34.
- 36 46 Mhurchu C, Eyles H, Choi Y-H. Effects of a voluntary front-of-pack nutrition labelling  
37 system on packaged food reformulation: The health star rating system in New Zealand.  
38 *Nutrients* 2017;**9**:918.
- 39 47 Simmonds M, Llewellyn A, Owen CG, *et al.* Predicting adult obesity from childhood  
40 obesity: a systematic review and meta-analysis. *Obes Rev* 2016;**17**:95–107.
- 41 48 Whitaker RC, Wright JA, Pepe MS, *et al.* Predicting obesity in young adulthood from  
42 childhood and parental obesity. *N Engl J Med* 1997;**337**:869–73.
- 43 49 Waters E, de Silva-Sanigorski A, Burford BJ, *et al.* Interventions for preventing obesity in  
44 children. *Cochrane Libr* 2011.

- 1  
2  
3 50 Salam RA, Hooda M, Das JK, *et al*. Interventions to improve adolescent nutrition: A  
4 systematic review and meta-analysis. *J Adolesc Heal* 2016;**59**:S29–39.  
5  
6  
7  
8  
9  
10  
11  
12  
13  
14  
15  
16  
17  
18  
19  
20  
21  
22  
23  
24  
25  
26  
27  
28  
29  
30  
31  
32  
33  
34  
35  
36  
37  
38  
39  
40  
41  
42  
43  
44  
45  
46  
47  
48  
49  
50  
51  
52  
53  
54  
55  
56  
57  
58  
59  
60



1  
2  
3 **Figure 1. Percent Distribution of Overweight/Obesity in Indonesia Over Time<sup>1-4</sup>**  
4

5 [see attached Figure 1]  
6

- 7  
8 <sup>1</sup> Percentages are weighted to be representative of the population of Indonesia in the given survey year  
9 <sup>2</sup> Adults: excludes women who are currently pregnant. Overweight/obesity defined as BMI  $\geq 25$  kg/m<sup>2</sup>  
10 <sup>3</sup> Children Aged 0-5 years: overweight/obesity defined as weight-for-height z-score  $> 2$  using the MGRS Standard  
11 <sup>4</sup> Children Aged 6-18 years: overweight/obesity as BMI-for-age z-score  $> 1$  using the WHO Reference  
12  
13  
14  
15  
16  
17  
18  
19  
20  
21  
22  
23  
24  
25  
26  
27  
28  
29  
30  
31  
32  
33  
34  
35  
36  
37  
38  
39  
40  
41  
42  
43  
44  
45  
46  
47  
48  
49  
50  
51  
52  
53  
54  
55  
56  
57  
58  
59  
60

1  
2  
3 **Figure 2. Summary of Associations between Selected Characteristics and**  
4 **Overweight/Obesity in Multivariate Models**  
5

6  
7 [See Attached Figure 2]  
8

9 -- not applicable; ns = not significant

10 **Associated with higher odds of overweight/obesity in multivariate models**

11 **Associated with lower odds of overweight/obesity in multivariate models**

12 **Direction of association with overweight/obesity is mixed in multivariate models**

13 <sup>1</sup> Parental characteristic for child models  
14  
15  
16  
17  
18  
19  
20  
21  
22  
23  
24  
25  
26  
27  
28  
29  
30  
31  
32  
33  
34  
35  
36  
37  
38  
39  
40  
41  
42  
43  
44  
45  
46  
47  
48  
49  
50  
51  
52  
53  
54  
55  
56  
57  
58  
59  
60

1  
2  
3  
4  
5  
6  
7  
8  
9  
10  
11  
12  
13  
14  
15  
16  
17  
18  
19  
20  
21  
22  
23  
24  
25  
26  
27  
28  
29  
30  
31  
32  
33  
34  
35  
36  
37  
38  
39  
40  
41  
42  
43  
44  
45  
46  
47  
48  
49  
50  
51  
52  
53  
54  
55  
56  
57  
58  
59  
60

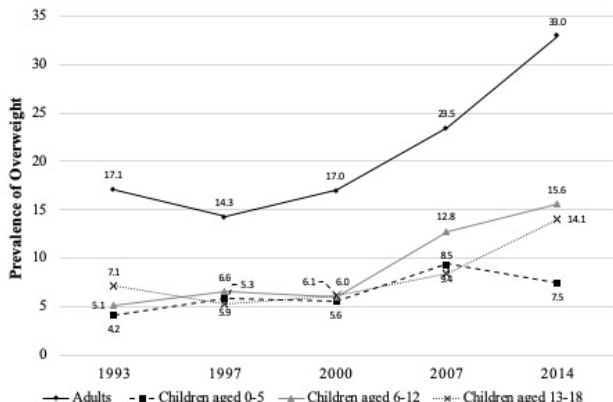

338x190mm (54 x 54 DPI)

1  
2  
3  
4  
5  
6  
7  
8  
9  
10  
11  
12  
13  
14  
15  
16  
17  
18  
19  
20  
21  
22  
23  
24  
25  
26  
27  
28  
29  
30  
31  
32  
33  
34  
35  
36  
37  
38  
39  
40  
41  
42  
43  
44  
45  
46  
47  
48  
49  
50  
51  
52  
53  
54  
55  
56  
57  
58  
59  
60

|                                     | Adults |     | Children |        |         |
|-------------------------------------|--------|-----|----------|--------|---------|
|                                     | Women  | Men | 0-5 y    | 6-12 y | 13-18 y |
| Age                                 |        |     | **       |        |         |
| Gender                              | **     | **  | **       | **     | **      |
| Ever Breastfed                      | **     | **  | **       | **     | **      |
| Exclusively Breastfed               | **     | **  | **       | **     | **      |
| Complementary Food                  | **     | **  | **       | **     | **      |
| Education <sup>1</sup>              |        |     | **       | **     | **      |
| Smoking Status                      |        |     | **       | **     | **      |
| Marital Status                      |        |     | **       | **     | **      |
| Employment <sup>1</sup>             |        |     | **       | **     | **      |
| Maternal Overweight/Obesity         | **     | **  | **       | **     | **      |
| Vigorous Physical Activity          | **     | **  | **       | **     | **      |
| Moderate Physical Activity          | **     | **  | **       | **     | **      |
| Walking                             | **     | **  | **       | **     | **      |
| Consumed Instant Noodles            | **     | **  | **       | **     | **      |
| Consumed Fast Food                  | **     | **  | **       | **     | **      |
| Consumed Soda                       | **     | **  | **       | **     | **      |
| Consumed Fried Snacks               | **     | **  | **       | **     | **      |
| Household Expenditures: Rice        | **     | **  | **       | **     | **      |
| Household Expenditures: Cooking Oil | **     | **  | **       | **     | **      |
| Household Urban/Rural Residence     | **     | **  | **       | **     | **      |
| Household Wealth                    | **     | **  | **       | **     | **      |
| Household Size                      | **     | **  | **       | **     | **      |

338x190mm (54 x 54 DPI)

## Online Supplemental Material

**Supplemental Table 1. Percent Distribution of Selected Characteristics Among Overweight Children Aged 0-5 in Indonesia Over Time**

|                                          | 1993 <sup>1</sup> |      | 1997 <sup>1</sup> |       | 2000 <sup>1</sup> |      | 2007 <sup>1</sup> |      | 2014 <sup>1</sup> |      |  |
|------------------------------------------|-------------------|------|-------------------|-------|-------------------|------|-------------------|------|-------------------|------|--|
|                                          | n                 | %    | n                 | %     | n                 | %    | n                 | %    | n                 | %    |  |
| <b>Age</b>                               |                   |      |                   |       |                   |      |                   |      |                   |      |  |
| 0-2 y                                    | 58                | 76.6 | 88                | 81.5  | 145               | 72.2 | 301               | 72.7 | 230               | 62.4 |  |
| 3-5 y                                    | 20                | 23.4 | 21                | 18.5  | 47                | 27.8 | 107               | 27.3 | 133               | 37.6 |  |
| <b>Gender</b>                            |                   |      |                   |       |                   |      |                   |      |                   |      |  |
| Boys                                     | 40                | 52.7 | 56                | 47.9  | 112               | 58.2 | 236               | 55.1 | 210               | 57.7 |  |
| Girls                                    | 38                | 47.3 | 109               | 52.1  | 80                | 41.8 | 172               | 44.9 | 153               | 42.3 |  |
| <b>Ever Breastfed<sup>2</sup></b>        |                   |      |                   |       |                   |      |                   |      |                   |      |  |
| No                                       | 4                 | 5.4  | 0                 | 0     | 3                 | 2.4  | 11                | 3.2  | 10                | 2.7  |  |
| Yes                                      | 46                | 94.6 | 25                | 100.0 | 132               | 97.6 | 350               | 96.8 | 318               | 97.3 |  |
| <b>Exclusively Breastfed<sup>2</sup></b> |                   |      |                   |       |                   |      |                   |      |                   |      |  |
| No                                       | 49                | 95.4 | 23                | 88.9  | 131               | 96.1 | 332               | 92.8 | 274               | 84.4 |  |
| Yes                                      | 1                 | 4.6  | 2                 | 11.1  | 4                 | 3.9  | 29                | 7.2  | 54                | 19.6 |  |
| <b>Complementary Foods<sup>2</sup></b>   |                   |      |                   |       |                   |      |                   |      |                   |      |  |
| < 6 mo or ≥ 8 mo                         | 41                | 94.8 | 21                | 100   | 110               | 96.2 | 290               | 91.2 | 247               | 55.8 |  |
| ≥ 6 mo to < 8 mo                         | 1                 | 5.2  | 0                 | 0     | 4                 | 3.8  | 31                | 8.8  | 51                | 44.2 |  |
| <b>Parental Education<sup>3</sup></b>    |                   |      |                   |       |                   |      |                   |      |                   |      |  |
| No Education                             | 9                 | 17.0 | 19                | 18.0  | 20                | 11.6 | 24                | 8.1  | 11                | 3.9  |  |
| Primary                                  | 31                | 61.1 | 53                | 57.4  | 98                | 51.4 | 118               | 35.1 | 96                | 33.0 |  |
| Junior or Senior                         | 12                | 17.7 | 18                | 17.5  | 56                | 29.3 | 169               | 45.3 | 156               | 47.3 |  |
| University                               | 3                 | 4.2  | 7                 | 7.0   | 14                | 7.7  | 44                | 11.5 | 56                | 15.8 |  |
| <b>Parental Employment<sup>3</sup></b>   |                   |      |                   |       |                   |      |                   |      |                   |      |  |
| Not working                              | 30                | 58.1 | 77                | 71.0  | 118               | 61.2 | 230               | 57.8 | 185               | 53.7 |  |
| Agriculture                              | 5                 | 9.3  | 5                 | 3.8   | 18                | 11.3 | 35                | 9.6  | 22                | 5.6  |  |
| Skilled Manual <sup>4</sup>              | 9                 | 16.1 | 9                 | 8.6   | 13                | 7.3  | 36                | 9.0  | 24                | 7.3  |  |
| Skilled <sup>5</sup>                     | 11                | 16.5 | 17                | 16.5  | 39                | 20.2 | 103               | 23.5 | 130               | 33.4 |  |
| <b>Maternal Overweight</b>               |                   |      |                   |       |                   |      |                   |      |                   |      |  |
| Not Overweight                           | 33                | 79.5 | 88                | 85.1  | 158               | 88.3 | 288               | 73.3 | 198               | 58.7 |  |
| Overweight                               | 10                | 20.5 | 15                | 14.9  | 23                | 11.7 | 104               | 26.7 | 149               | 41.3 |  |
| <b>Residence</b>                         |                   |      |                   |       |                   |      |                   |      |                   |      |  |
| Rural                                    | 46                | 70.6 | 56                | 55.6  | 91                | 49.0 | 151               | 44.2 | 123               | 39.2 |  |
| Urban                                    | 32                | 29.4 | 53                | 44.4  | 101               | 51.0 | 257               | 55.8 | 240               | 60.8 |  |

## Online Supplemental Material

## Wealth

|         |    |      |    |      |    |      |     |      |    |      |
|---------|----|------|----|------|----|------|-----|------|----|------|
| Lowest  | 26 | 39.8 | 20 | 20.7 | 39 | 22.1 | 114 | 31.6 | 56 | 18.8 |
| Second  | 7  | 7.2  | 15 | 14.8 | 37 | 21.0 | 80  | 22.4 | 69 | 25.0 |
| Middle  | 12 | 17.0 | 27 | 25.2 | 34 | 19.9 | 60  | 19.3 | 43 | 16.3 |
| Fourth  | 19 | 28.3 | 15 | 14.6 | 31 | 19.2 | 53  | 15.2 | 65 | 22.5 |
| Highest | 13 | 7.7  | 24 | 24.7 | 29 | 17.7 | 46  | 11.4 | 52 | 17.4 |

## Family Size

|     |    |      |    |      |     |      |     |      |     |      |
|-----|----|------|----|------|-----|------|-----|------|-----|------|
| ≤ 4 | 26 | 22.1 | 30 | 26.9 | 86  | 46.9 | 167 | 41.1 | 195 | 54.2 |
| > 4 | 52 | 77.9 | 79 | 73.1 | 106 | 53.1 | 241 | 58.9 | 168 | 45.8 |

<sup>1</sup> Overweight defined as weight-for-height z-score > 2 using the MGRS Standard. Percentages are weighted to be representative of the population of Indonesia in the given survey year

<sup>2</sup> Breastfeeding data are reported by the mother retrospectively. Exclusively breastfed indicates whether the child was only given breastmilk (no water or complementary foods) when the child was aged 0-6 months. Complementary foods indicate appropriate timing of complementary foods, that is, the introduction of complementary foods when the child was 6-8 months old.

<sup>3</sup> Parental characteristics are of the mother, when available. When not available the characteristic is based on the father's data

<sup>4</sup> Skilled manual labor combines the following employment sectors: mining, manufacturing, electric, gas, water maintenance, and construction

<sup>5</sup> Skilled labor combines the following employment sectors: retail and service, transportation

## Online Supplemental Material

**Supplemental Table 2. Percent Distribution of Selected Characteristics Among Overweight Children Aged 6-12 in Indonesia Over Time**

|                                  | 1993 <sup>1</sup> |      | 1997 <sup>1</sup> |      | 2000 <sup>1</sup> |      | 2007 <sup>1</sup> |      | 2014 <sup>1</sup> |      |  |
|----------------------------------|-------------------|------|-------------------|------|-------------------|------|-------------------|------|-------------------|------|--|
|                                  | n                 | %    | n                 | %    | n                 | %    | n                 | %    | n                 | %    |  |
| Child Age                        |                   |      |                   |      |                   |      |                   |      |                   |      |  |
| 6-9 y                            | 113               | 55.6 | 183               | 58.6 | 206               | 59.0 | 495               | 59.0 | 760               | 53.3 |  |
| 10-12 y                          | 48                | 44.4 | 90                | 41.4 | 91                | 41.0 | 200               | 41.0 | 332               | 46.7 |  |
| Gender                           |                   |      |                   |      |                   |      |                   |      |                   |      |  |
| Boys                             | 77                | 44.0 | 144               | 51.4 | 166               | 54.5 | 387               | 55.1 | 601               | 53.4 |  |
| Girls                            | 84                | 56.0 | 132               | 48.6 | 133               | 45.5 | 310               | 44.9 | 492               | 46.6 |  |
| Parental Education <sup>2</sup>  |                   |      |                   |      |                   |      |                   |      |                   |      |  |
| No Education                     | 10                | 7.5  | 126               | 27.3 | 42                | 15.2 | 51                | 9.1  | 46                | 5.4  |  |
| Primary                          | 69                | 70.5 | 49                | 51.9 | 135               | 44.4 | 230               | 40.4 | 282               | 32.5 |  |
| Junior or Senior                 | 23                | 13.0 | 15                | 14.9 | 91                | 30.5 | 237               | 37.3 | 441               | 45.4 |  |
| University                       | 14                | 8.9  | 254               | 5.8  | 25                | 9.9  | 85                | 13.3 | 182               | 16.8 |  |
| Parental Employment <sup>2</sup> |                   |      |                   |      |                   |      |                   |      |                   |      |  |
| Not Working                      | 53                | 46.3 | 162               | 61.0 | 132               | 44.0 | 317               | 45.3 | 448               | 42.9 |  |
| Agriculture                      | 6                 | 6.9  | 32                | 11.3 | 42                | 14.1 | 76                | 12.9 | 91                | 9.7  |  |
| Skilled Manual <sup>3</sup>      | 19                | 17.8 | 11                | 4.4  | 33                | 13.2 | 54                | 8.1  | 79                | 7.9  |  |
| Skilled <sup>4</sup>             | 36                | 29.0 | 63                | 23.3 | 87                | 28.7 | 232               | 33.7 | 442               | 39.5 |  |
| Maternal Overweight              |                   |      |                   |      |                   |      |                   |      |                   |      |  |
| Not Overweight                   | 60                | 68.9 | 184               | 72.3 | 186               | 66.2 | 356               | 56.2 | 454               | 44.9 |  |
| Overweight                       | 38                | 31.1 | 73                | 27.7 | 96                | 33.8 | 289               | 43.8 | 541               | 55.1 |  |
| Residence                        |                   |      |                   |      |                   |      |                   |      |                   |      |  |
| Rural                            | 61                | 56.7 | 129               | 53.8 | 112               | 39.9 | 255               | 45.3 | 298               | 37.0 |  |
| Urban                            | 100               | 43.3 | 146               | 46.2 | 187               | 60.1 | 442               | 54.7 | 795               | 63.0 |  |
| Wealth                           |                   |      |                   |      |                   |      |                   |      |                   |      |  |
| Lowest                           | 30                | 22.2 | 50                | 22.3 | 36                | 13.1 | 87                | 15.4 | 129               | 16.3 |  |
| Second                           | 17                | 16.1 | 37                | 14.4 | 44                | 18.1 | 142               | 26.0 | 160               | 21.4 |  |
| Middle                           | 36                | 20.5 | 44                | 19.6 | 45                | 20.4 | 75                | 13.0 | 141               | 19.3 |  |
| Fourth                           | 29                | 18.9 | 45                | 20.3 | 48                | 20.6 | 139               | 25.1 | 173               | 21.1 |  |
| Highest                          | 47                | 22.3 | 62                | 23.4 | 66                | 27.9 | 120               | 20.6 | 181               | 21.8 |  |
| Family Size                      |                   |      |                   |      |                   |      |                   |      |                   |      |  |
| ≤ 4                              | 49                | 35.4 | 65                | 22.5 | 114               | 39.4 | 222               | 32.3 | 621               | 58.6 |  |
| > 4                              | 112               | 64.6 | 211               | 77.5 | 185               | 60.6 | 475               | 67.7 | 472               | 41.4 |  |

<sup>1</sup> Overweight defined as BMI-for-age z-score > 1 using the WHO Reference. Percentages are weighted to be representative of the population of Indonesia in the given survey year

<sup>2</sup> Parental characteristics are of the mother, when available. When not available the characteristic is based on the father's data

<sup>3</sup> Skilled manual labor combines the following employment sectors: mining, manufacturing, electric, gas, water maintenance, and construction

<sup>4</sup> Skilled labor combines the following employment sectors: retail and service, transportation

**Supplemental Table 3. Percent Distribution of Selected Characteristics Among Overweight Children Aged 13-18 in Indonesia Over Time**

|                                        | 1993 <sup>1</sup> |      | 1997 <sup>1</sup> |      | 2000 <sup>1</sup> |      | 2007 <sup>1</sup> |      | 2014 <sup>1</sup> |      |  |
|----------------------------------------|-------------------|------|-------------------|------|-------------------|------|-------------------|------|-------------------|------|--|
|                                        | n                 | %    | n                 | %    | n                 | %    | n                 | %    | n                 | %    |  |
| <b>Child Age</b>                       |                   |      |                   |      |                   |      |                   |      |                   |      |  |
| 13-15 y                                | 45                | 67.9 | 84                | 53.9 | 98                | 47.6 | 301               | 48.5 | 280               | 54.1 |  |
| 16-18 y                                | 9                 | 32.0 | 74                | 46.1 | 131               | 52.4 | 107               | 51.5 | 262               | 45.9 |  |
| <b>Gender</b>                          |                   |      |                   |      |                   |      |                   |      |                   |      |  |
| Boys                                   | 40                | 52.2 | 90                | 44.9 | 95                | 35.8 | 150               | 40.7 | 333               | 48.9 |  |
| Girls                                  | 43                | 47.8 | 121               | 55.1 | 179               | 64.2 | 217               | 59.3 | 374               | 51.1 |  |
| <b>Parental Education<sup>2</sup></b>  |                   |      |                   |      |                   |      |                   |      |                   |      |  |
| No Education                           | 7                 | 10.8 | 48                | 27.4 | 45                | 19.5 | 36                | 10.9 | 36                | 6.5  |  |
| Primary                                | 46                | 72.0 | 96                | 53.7 | 136               | 56.3 | 164               | 54.6 | 240               | 42.2 |  |
| Junior or Senior                       | 9                 | 8.0  | 34                | 15.4 | 47                | 17.0 | 93                | 27.2 | 265               | 41.0 |  |
| University                             | 3                 | 9.2  | 7                 | 3.5  | 14                | 7.2  | 23                | 7.3  | 72                | 10.3 |  |
| <b>Parental Employment<sup>2</sup></b> |                   |      |                   |      |                   |      |                   |      |                   |      |  |
| Not Working                            | 38                | 64.9 | 112               | 56.8 | 91                | 36.8 | 132               | 39.9 | 277               | 45.3 |  |
| Agriculture                            | 2                 | 4.3  | 14                | 8.1  | 39                | 16.6 | 43                | 13.7 | 64                | 11.0 |  |
| Skilled Manual <sup>3</sup>            | 4                 | 3.2  | 11                | 4.9  | 15                | 7.4  | 30                | 9.2  | 46                | 8.3  |  |
| Skilled <sup>4</sup>                   | 21                | 27.6 | 59                | 30.2 | 97                | 39.2 | 129               | 37.2 | 260               | 35.3 |  |
| <b>Maternal Overweight</b>             |                   |      |                   |      |                   |      |                   |      |                   |      |  |
| Not Overweight                         | 28                | 57.2 | 110               | 54.3 | 132               | 56.3 | 173               | 54.2 | 256               | 40.7 |  |
| Overweight                             | 29                | 42.8 | 90                | 45.7 | 108               | 43.7 | 155               | 45.8 | 371               | 59.3 |  |
| <b>Household Level</b>                 |                   |      |                   |      |                   |      |                   |      |                   |      |  |
| <b>Residence</b>                       |                   |      |                   |      |                   |      |                   |      |                   |      |  |
| Rural                                  | 20                | 39.7 | 69                | 37.9 | 114               | 45.5 | 134               | 42.4 | 204               | 39.5 |  |
| Urban                                  | 63                | 60.3 | 142               | 62.1 | 160               | 54.5 | 233               | 57.6 | 503               | 60.5 |  |
| <b>Wealth</b>                          |                   |      |                   |      |                   |      |                   |      |                   |      |  |
| Lowest                                 | 11                | 14.6 | 26                | 15.2 | 38                | 16.5 | 46                | 16.6 | 118               | 23.8 |  |
| Second                                 | 5                 | 3.3  | 28                | 13.5 | 40                | 20.0 | 71                | 25.6 | 119               | 24.0 |  |
| Middle                                 | 18                | 30.2 | 44                | 27.8 | 47                | 21.2 | 33                | 12.5 | 80                | 16.1 |  |
| Fourth                                 | 19                | 21.3 | 29                | 17.4 | 37                | 15.3 | 65                | 23.4 | 86                | 18.2 |  |
| Highest                                | 29                | 30.6 | 47                | 26.1 | 58                | 26.9 | 63                | 21.8 | 103               | 17.9 |  |
| <b>Family Size</b>                     |                   |      |                   |      |                   |      |                   |      |                   |      |  |
| ≤ 4                                    | 21                | 29.0 | 31                | 17.0 | 92                | 36.1 | 74                | 21.9 | 353               | 54.6 |  |
| > 4                                    | 62                | 71.0 | 180               | 83.0 | 182               | 63.9 | 293               | 78.1 | 354               | 45.4 |  |

<sup>1</sup> Overweight is defined as BMI-for-age z-score > 1 using the WHO Reference. Percentages are weighted to be representative of the population of Indonesia in the given survey year

<sup>2</sup> Parental characteristics are of the mother, when available. When not available the characteristic is based on the father's data



Online Supplemental Material

1  
2  
3  
4  
5  
6  
7  
8  
9  
10  
11  
12  
13  
14  
15  
16  
17  
18  
19  
20  
21  
22  
23  
24  
25  
26  
27  
28  
29  
30  
31  
32  
33  
34  
35  
36  
37  
38  
39  
40  
41  
42  
43  
44  
45  
46  
47  
48  
49  
50  
51  
52  
53  
54  
55  
56  
57  
58  
59  
60

<sup>3</sup> Skilled manual labor combines the following employment sectors: mining, manufacturing, electric, gas, water maintenance, and construction

<sup>4</sup> Skilled labor combines the following employment sectors: retail and service, transportation

For peer review only

**Supplemental Table 4. Univariate Logistic Regression Models Investigating the Associations Between Selected Characteristics and Overweight Among Adults in Indonesia in 2014**

|                                                        | Women <sup>1,2</sup> |                     | Men <sup>1,2</sup> |                      |
|--------------------------------------------------------|----------------------|---------------------|--------------------|----------------------|
|                                                        | n                    | Odds Ratio (95% CI) | n                  | Odds Ratio (95% CI)  |
| <b>Age</b>                                             |                      |                     |                    |                      |
| 19-29 y                                                | 4,350                | Reference           | 3,680              | Reference            |
| 30-39 y                                                | 4,217                | 2.23 (2.01, 2.46) * | 3,981              | 1.95 (1.72, 2.22) *  |
| 40-49 y                                                | 2,807                | 2.93 (2.62, 3.27) * | 2,766              | 2.41 (2.10, 2.76) *  |
| 50-59 y                                                | 2,053                | 2.26 (2.00, 2.56) * | 1,748              | 2.09 (1.79, 2.44) *  |
| 60+ y                                                  | 1,858                | 1.04 (0.91, 1.19)   | 1,612              | 0.95 (0.79, 1.13) *  |
| <b>Education</b>                                       |                      |                     |                    |                      |
| No Education                                           | 1,033                | Reference           | 381                | Reference            |
| Primary                                                | 4,912                | 2.89 (2.42, 3.45) * | 4,192              | 2.44 (1.61, 3.70) *  |
| Junior or Senior                                       | 4,894                | 2.98 (2.49, 3.55) * | 4,901              | 4.30 (2.85, 6.49) *  |
| University                                             | 1,581                | 2.90 (2.36, 3.55) * | 1,487              | 8.48 (5.55, 12.94) * |
| <b>Smoking Status</b>                                  |                      |                     |                    |                      |
| Non-Smoker                                             | 14,772               | Reference           | 4,552              | Reference            |
| Smoker                                                 | 434                  | 0.57 (0.45, 0.72) * | 9,165              | 0.47 (0.43, 0.52) *  |
| <b>Marital Status</b>                                  |                      |                     |                    |                      |
| Never Married                                          | 1,560                | Reference           | 2,436              | Reference            |
| Married                                                | 11,549               | 3.37 (2.88, 3.95) * | 10,780             | 2.04 (1.78, 2.34) *  |
| Other                                                  | 2,172                | 1.78 (1.48, 2.14) * | 565                | 1.10 (0.82, 1.46)    |
| <b>Employment</b>                                      |                      |                     |                    |                      |
| Not Working                                            | 5,713                | Reference           | 1,291              | Reference            |
| Agriculture                                            | 2,355                | 0.73 (0.64, 0.82) * | 3,565              | 0.63 (0.52, 0.77) *  |
| Skilled Manual <sup>3</sup>                            | 1,312                | 0.94 (0.81, 1.09)   | 2,886              | 1.06 (0.88, 1.28)    |
| Skilled <sup>4</sup>                                   | 5,644                | 1.46 (1.33, 1.60) * | 5,799              | 2.03 (1.71, 2.41) *  |
| <b>Physical Activity in the Last Week<sup>5</sup>:</b> |                      |                     |                    |                      |
| No Vigorous Activity                                   | 13,001               | Reference           | 8,360              | Reference            |
| Vigorous Activity                                      | 1,556                | 0.94 (0.82, 1.07)   | 4,762              | 0.69 (0.62, 0.77) *  |
| No Moderate Activity                                   | 6,015                | Reference           | 6,126              | Reference            |
| Moderate Activity                                      | 8,542                | 1.18 (1.09, 1.28) * | 6,996              | 0.98 (0.89, 1.07)    |
| No Walking                                             | 4,706                | Reference           | 3,628              | Reference            |

## Online Supplemental Material

7

1  
2  
3  
4  
5  
6  
7  
8  
9  
10  
11  
12  
13  
14  
15  
16  
17  
18  
19  
20  
21  
22  
23  
24  
25  
26  
27  
28  
29  
30  
31  
32  
33  
34  
35  
36  
37  
38  
39  
40  
41  
42  
43  
44  
45  
46  
47  
48  
49  
50  
51  
52  
53  
54  
55  
56  
57  
58  
59  
60

|                                                              |        |                     |        |                     |
|--------------------------------------------------------------|--------|---------------------|--------|---------------------|
| Walking                                                      | 9,851  | 0.98 (0.90, 1.07)   | 9,494  | 1.00 (0.90, 1.11)   |
| Consumed in the Last Week:                                   |        |                     |        |                     |
| <i>Instant Noodles</i>                                       |        |                     |        |                     |
| No                                                           | 5,125  | Reference           | 4,428  | Reference           |
| Yes                                                          | 9,425  | 1.10 (1.01, 1.19) * | 8,685  | 1.03 (0.93, 1.14)   |
| <i>Fast Food</i>                                             |        |                     |        |                     |
| No                                                           | 12,902 | Reference           | 11,825 | Reference           |
| Yes                                                          | 1,648  | 1.18 (1.04, 1.34) * | 1,288  | 1.55 (1.34, 1.80) * |
| <i>Soda</i>                                                  |        |                     |        |                     |
| No                                                           | 12,620 | Reference           | 9,838  | Reference           |
| Yes                                                          | 1,930  | 1.05 (0.93, 1.19)   | 3,275  | 1.13 (1.01, 1.25) * |
| <i>Fried Snacks</i>                                          |        |                     |        |                     |
| No                                                           | 5,253  | Reference           | 4,468  | Reference           |
| Yes                                                          | 9,297  | 1.26 (1.16, 1.37) * | 8,645  | 1.22 (1.10, 1.35) * |
| Mean Number of Days Consumed in the Last Week <sup>6</sup> : |        |                     |        |                     |
| Instant Noodles                                              | 9,425  | 1.00 (0.97, 1.03)   | 8,685  | 0.95 (0.92, 0.98) * |
| Fast Food                                                    | 1,648  | 0.99 (0.91, 1.08)   | 1,288  | 0.96 (0.83, 1.11)   |
| Soda                                                         | 1,930  | 1.01 (0.93, 1.09)   | 3,275  | 0.95 (0.90, 1.01)   |
| Fried Snacks                                                 | 9,297  | 1.04 (0.99, 1.06)   | 8,645  | 1.01 (0.99, 1.04)   |
| Food Expenditures <sup>7</sup>                               |        |                     |        |                     |
| <i>Rice</i>                                                  |        |                     |        |                     |
| Lowest                                                       | 7,946  | Reference           | 7,165  | Reference           |
| Highest                                                      | 7,315  | 1.14 (1.05, 1.23) * | 6,583  | 0.99 (0.90, 1.08)   |
| <i>Cooking oil</i>                                           |        |                     |        |                     |
| Lowest                                                       | 9,192  | Reference           | 8,391  | Reference           |
| Highest                                                      | 6,067  | 1.25 (1.15, 1.36) * | 5,355  | 1.34 (1.21, 1.47) * |
| Residence                                                    |        |                     |        |                     |
| Rural                                                        | 6,242  | Reference           | 5,688  | Reference           |
| Urban                                                        | 9,043  | 1.39 (1.29, 1.51) * | 8,097  | 1.92 (1.74, 2.12) * |
| Wealth                                                       |        |                     |        |                     |
| Lowest                                                       | 2,818  | Reference           | 2,879  | Reference           |
| Second                                                       | 2,538  | 1.22 (1.06, 1.39) * | 2,528  | 1.25 (1.07, 1.47) * |

## Online Supplemental Material

8

|         |       |                     |       |                     |
|---------|-------|---------------------|-------|---------------------|
| Middle  | 1,829 | 1.19 (1.03, 1.38) * | 1,863 | 1.40 (1.18, 1.66) * |
| Fourth  | 2,129 | 1.14 (0.99, 1.32)   | 2,104 | 1.54 (1.31, 1.81) * |
| Highest | 1,998 | 1.19 (1.03, 1.36) * | 1,956 | 2.16 (1.85, 2.52) * |

## Family Size

|     |       |                   |       |                   |
|-----|-------|-------------------|-------|-------------------|
| ≤ 4 | 9,542 | Reference         | 8,590 | Reference         |
| > 4 | 5,743 | 0.96 (0.89, 1.04) | 5,195 | 0.97 (0.88, 1.07) |

---

CI = confidence interval

<sup>1</sup> Overweight is defined as BMI ≥ 25 kg/m<sup>2</sup>

<sup>2</sup> Odds ratios and confidence intervals are estimated using logistic regression and are weighted to account for the survey design. Models exclude women who are currently pregnant.

<sup>3</sup> Skilled manual labor combines the following employment sectors: mining, manufacturing, electric, gas, water maintenance, and construction

<sup>4</sup> Skilled labor combines the following employment sectors: retail and service, transportation

<sup>5</sup> Defined using the International Physical Activity Questionnaire

<sup>6</sup> Modelled as a continuous variable, the average number of days consumed is queried if the respondent reported that they consumed item during the last week

<sup>7</sup> Indicates the household level expenditure on each item as a percentage of the households' total expenditures on food

\*  $p < 0.05$

**Supplemental Table 5. Longitudinal Associations Between Selected Characteristics and Overweight Among Adult Women Aged 19 + in Indonesia 1993-2014**

|                                |                             | Risk Ratio (95% Confidence Interval) |                           |                             |
|--------------------------------|-----------------------------|--------------------------------------|---------------------------|-----------------------------|
|                                |                             |                                      | Univariate <sup>1,2</sup> | Multivariate <sup>1,2</sup> |
|                                |                             | N                                    | Risk Ratio (95% CI)       | Risk Ratio (95% CI)         |
| Age                            |                             | N=29,541                             |                           |                             |
|                                | 19-29 y                     |                                      | Reference                 | Reference                   |
|                                | 30-39 y                     |                                      | 2.00 (1.85, 2.17) *       | 1.75 (1.56, 1.97) *         |
|                                | 40-49 y                     |                                      | 2.33 (2.16, 2.51) *       | 2.02 (1.80, 2.27) *         |
|                                | 50-59 y                     |                                      | 1.85 (1.71, 2.00) *       | 1.76 (1.56, 1.98) *         |
|                                | 60+ y                       |                                      | 1.09 (1.00, 1.19) *       | 1.39 (1.21, 1.59) *         |
| Education                      |                             | N=25,970                             |                           |                             |
|                                | No Education                |                                      | Reference                 | Reference                   |
|                                | Primary                     |                                      | 2.05 (1.89, 2.23) *       | 1.63 (1.47, 1.80) *         |
|                                | Junior or Senior            |                                      | 2.00 (1.82, 2.18) *       | 1.60 (1.42, 1.80) *         |
|                                | University                  |                                      | 2.03 (1.81, 2.28) *       | 1.53 (1.32, 1.78) *         |
| Smoking Status                 |                             | N=28,967                             |                           |                             |
|                                | Non-Smoker                  |                                      | Reference                 | Reference                   |
|                                | Smoker                      |                                      | 0.58 (0.51, 0.66) *       | 0.75 (0.65, 0.87) *         |
| Marital Status                 |                             | N=29,055                             |                           |                             |
|                                | Never Married               |                                      | Reference                 | Reference                   |
|                                | Married                     |                                      | 3.03 (2.63, 3.49) *       | 2.25 (1.81, 2.81) *         |
|                                | Other                       |                                      | 2.01 (1.73, 2.34) *       | 1.60 (1.25, 2.06) *         |
| Employment                     |                             | N=28,726                             |                           |                             |
|                                | Not Working                 |                                      | Reference                 | Reference                   |
|                                | Agriculture                 |                                      | 0.72 (0.67, 0.77) *       | 0.77 (0.71, 0.84) *         |
|                                | Skilled Manual <sup>3</sup> |                                      | 0.90 (0.82, 0.98) *       | 0.93 (0.84, 1.04)           |
|                                | Skilled <sup>4</sup>        |                                      | 1.30 (1.23, 1.36) *       | 1.13 (1.07, 1.20) *         |
| Food Expenditures <sup>5</sup> |                             |                                      |                           |                             |
|                                | <i>Rice</i>                 | N=28,654                             |                           |                             |
|                                | Lowest                      |                                      | Reference                 | Reference                   |
|                                | Highest                     |                                      | 1.12 (1.07, 1.17) *       | 1.00 (0.95, 1.06)           |
|                                | <i>Soda</i>                 | N=27,508                             |                           |                             |
|                                | Lowest                      |                                      | Reference                 | Reference                   |
|                                | Highest                     |                                      | 1.26 (1.19, 1.33) *       | 1.13 (1.06, 1.21) *         |

## Online Supplemental Material

1<sup>1</sup>

|             |                    |          |                     |                     |
|-------------|--------------------|----------|---------------------|---------------------|
|             | <i>Snacks</i>      | N=29,057 |                     |                     |
|             | Lowest             |          | Reference           | Reference           |
|             | Highest            |          | 1.20 (1.15, 1.25) * | 1.03 (0.98, 1.09)   |
|             | <i>Cooking oil</i> | N=29,172 |                     |                     |
|             | Lowest             |          | Reference           | Reference           |
|             | Highest            |          | 1.31 (1.25, 1.37) * | 1.17 (1.11, 1.23) * |
| Residence   |                    | N=29,537 |                     |                     |
|             | Rural              |          | Reference           | Reference           |
|             | Urban              |          | 1.49 (1.43, 1.56) * | 1.31 (1.24, 1.39) * |
| Wealth      |                    | N=23,055 |                     |                     |
|             | Lowest             |          | Reference           | Reference           |
|             | Second             |          | 1.21 (1.11, 1.31) * | 1.16 (1.06, 1.26) * |
|             | Middle             |          | 1.26 (1.16, 1.36) * | 1.17 (1.07, 1.27) * |
|             | Fourth             |          | 1.37 (1.26, 1.48) * | 1.21 (1.11, 1.32) * |
|             | Highest            |          | 1.40 (1.30, 1.52) * | 1.17 (1.07, 1.27) * |
| Family Size |                    | N=29,540 |                     |                     |
|             | ≤ 4                |          | Reference           | Reference           |
|             | > 4                |          | 1.08 (1.03, 1.13) * | 0.93 (0.88, 0.99) * |

CI = confidence interval

<sup>1</sup> Overweight is defined as BMI ≥ 25 kg/m<sup>2</sup><sup>2</sup> Risk Ratios and confidence intervals are estimated using a modified Poisson model and are weighted to account for the survey design. Excludes pregnant women. N =18,018 in multivariate model<sup>3</sup> Skilled manual labor combines the following employment sectors: mining, manufacturing, electric, gas, water maintenance, and construction<sup>4</sup> Skilled labor combines the following employment sectors: retail and service, transportation<sup>5</sup> Indicates the household level expenditure on each item as a percentage of the households' total expenditures on food\*  $p < 0.05$

**Supplemental Table 6. Longitudinal Association Between Selected Characteristics and Overweight Among Adult Men Aged 19 + in Indonesia 1993-2014**

|                                | N        | Univariate <sup>1,2</sup> | Multivariate <sup>1,2</sup> |
|--------------------------------|----------|---------------------------|-----------------------------|
|                                |          | Risk Ratio (95% CI)       | Risk Ratio (95% CI)         |
| Age                            | N=24,169 |                           |                             |
| 19-29 y                        |          | Reference                 | Reference                   |
| 30-39 y                        |          | 2.18 (1.90, 2.50) *       | 1.74 (1.32, 2.28) *         |
| 40-49 y                        |          | 2.64 (2.32, 3.00) *       | 2.04 (1.57, 2.66) *         |
| 50-59 y                        |          | 2.18 (1.92, 2.47) *       | 1.90 (1.46, 2.48) *         |
| 60+ y                          |          | 1.13 (0.98, 1.30)         | 1.24 (0.94, 1.65)           |
| Education                      | N=21,072 |                           |                             |
| No Education                   |          | Reference                 | Reference                   |
| Primary                        |          | 2.26 (1.74, 2.94) *       | 1.56 (1.17, 2.08) *         |
| Junior or Senior               |          | 4.06 (3.11, 5.29) *       | 2.39 (1.77, 3.22) *         |
| University                     |          | 6.80 (5.18, 8.94) *       | 2.82 (2.07, 3.85) *         |
| Smoking Status                 | N=23,764 |                           |                             |
| Non-smoker                     |          | Reference                 | Reference                   |
| Smoker                         |          | 0.54 (0.50, 0.58) *       | 0.66 (0.60, 0.72) *         |
| Marital Status                 | N=23,846 |                           |                             |
| Never Married                  |          | Reference                 | Reference                   |
| Married                        |          | 2.07 (1.80, 2.38) *       | 1.87 (1.38, 2.53) *         |
| Other                          |          | 1.35 (1.02, 1.78) *       | 1.41 (0.85, 2.33)           |
| Employment                     | N=23,463 |                           |                             |
| Not Working                    |          | Reference                 | Reference                   |
| Agriculture                    |          | 0.65 (0.55, 0.76) *       | 0.60 (0.50, 0.72) *         |
| Skilled Manual <sup>3</sup>    |          | 1.19 (1.02, 1.38) *       | 0.92 (0.76, 1.10)           |
| Skilled <sup>4</sup>           |          | 2.10 (1.85, 2.39) *       | 1.30 (1.12, 1.52) *         |
| Food Expenditures <sup>5</sup> |          |                           |                             |
| Rice                           | N=23,310 |                           |                             |
| Lowest                         |          | Reference                 | na                          |
| Highest                        |          | 1.01 (0.93, 1.09)         | na                          |
| Soda                           | N=22,283 |                           |                             |
| Lowest                         |          | Reference                 | Reference                   |
| Highest                        |          | 1.56 (1.43, 1.71) *       | 1.15 (1.05, 1.27) *         |

## Online Supplemental Material

1

|             |                    |          |                     |                     |
|-------------|--------------------|----------|---------------------|---------------------|
|             | <i>Snacks</i>      | N=23,703 |                     |                     |
|             | Lowest             |          | Reference           | Reference           |
|             | Highest            |          | 1.58 (1.46, 1.71) * | 1.11 (1.01, 1.22) * |
|             | <i>Cooking oil</i> | N=23,797 |                     |                     |
|             | Lowest             |          | Reference           | Reference           |
|             | Highest            |          | 1.55 (1.44, 1.68) * | 1.23 (1.12, 1.34) * |
| Residence   |                    | N=24,168 |                     |                     |
|             | Rural              |          | Reference           | Reference           |
|             | Urban              |          | 1.97 (1.82, 2.14) * | 1.27 (1.15, 1.40) * |
| Wealth      |                    | N=21,036 |                     |                     |
|             | Lowest             |          | Reference           | Reference           |
|             | Second             |          | 1.26 (1.09, 1.46) * | 1.10 (0.94, 1.29) * |
|             | Middle             |          | 1.56 (1.35, 1.80) * | 1.30 (1.12, 1.52) * |
|             | Fourth             |          | 1.79 (1.56, 2.06) * | 1.30 (1.12, 1.51) * |
|             | Highest            |          | 2.44 (2.14, 2.79) * | 1.39 (1.20, 1.62) * |
| Family Size |                    | N=24,169 |                     |                     |
|             | ≤ 4                |          | Reference           | Reference           |
|             | > 4                |          | 1.11 (1.02, 1.20) * | 1.02 (0.93, 1.12)   |

CI = confidence interval; na = not applicable

<sup>1</sup> Overweight is defined as BMI ≥ 25 kg/m<sup>2</sup>

<sup>2</sup> Risk Ratios and confidence intervals are estimated using a modified Poisson model and are weighted to account for the survey design. N=16,519 in multivariate model

<sup>3</sup> Skilled manual labor combines the following employment sectors: mining, manufacturing, electric, gas, water maintenance, and construction

<sup>4</sup> Skilled labor combines the following employment sectors: retail and service, transportation

<sup>5</sup> Indicates the household level expenditure on each item as a percentage of the households' total expenditures on food

\*  $p < 0.05$



## Online Supplemental Material

**Supplemental Table 7. Univariate Logistic Regression Models Investigating the Associations Between Selected Characteristics and Overweight Among Children in Indonesia in 2014**

|                                                  | 6 months - 5 years <sup>1</sup> |                        | 6-12 years <sup>2</sup> |                        | 13-18 years <sup>2</sup> |                        |
|--------------------------------------------------|---------------------------------|------------------------|-------------------------|------------------------|--------------------------|------------------------|
|                                                  | n                               | Odds Ratio<br>(95% CI) | n                       | Odds Ratio<br>(95% CI) | n                        | Odds Ratio<br>(95% CI) |
| Mean Age <sup>3</sup>                            | 4,965                           | 0.88 (0.80, 0.97) *    | 7,012                   | 1.06 (1.02, 1.10) *    | 4,868                    | 0.87 (0.83, 0.92) *    |
| Gender                                           |                                 |                        |                         |                        |                          |                        |
| Boys                                             | 2,585                           | Reference              | 3,601                   | Reference              | 2,462                    | Reference              |
| Girls                                            | 2,380                           | 0.75 (0.59, 0.96) *    | 3,411                   | 0.87 (0.76, 1.01)      | 2,406                    | 1.20 (1.01, 1.44) *    |
| Ever Breastfed <sup>4</sup>                      |                                 |                        |                         |                        |                          |                        |
| No                                               | 140                             | Reference              |                         | na                     |                          | na                     |
| Yes                                              | 4,429                           | 1.15 (0.53, 2.47)      |                         | na                     |                          | na                     |
| Exclusively Breastfed <sup>4</sup>               |                                 |                        |                         |                        |                          |                        |
| No                                               | 3,646                           | Reference              |                         | na                     |                          | na                     |
| Yes                                              | 923                             | 0.82 (0.59, 1.15)      |                         | na                     |                          | na                     |
| Introduction of Complementary Foods <sup>4</sup> |                                 |                        |                         |                        |                          |                        |
| < 6 months or ≥ 8 months                         | 3,379                           | Reference              |                         | na                     |                          | na                     |
| ≥ 6 months to < 8 months                         | 840                             | 0.82 (0.58, 1.16)      |                         | na                     |                          | na                     |
| Parental Education <sup>5</sup>                  |                                 |                        |                         |                        |                          |                        |
| No Education                                     | 251                             | Reference              | 419                     | Reference              | 353                      | Reference              |
| Primary                                          | 1,562                           | 1.39 (0.65, 2.98)      | 2,449                   | 1.11 (0.76, 1.61)      | 1,904                    | 1.26 (0.83, 1.91)      |
| Junior or Senior                                 | 2,055                           | 1.69 (0.80, 3.59)      | 2,690                   | 1.70 (1.17, 2.46) *    | 1,555                    | 1.73 (1.14, 2.63) *    |
| University                                       | 564                             | 2.29 (1.04, 5.05) *    | 686                     | 3.00 (2.01, 4.47) *    | 331                      | 2.13 (1.31, 3.46) *    |

## Online Supplemental Material

1.

Parental Employment<sup>5</sup>

|                             |       |                     |       |                     |       |                     |
|-----------------------------|-------|---------------------|-------|---------------------|-------|---------------------|
| Not Working                 | 2,564 | Reference           | 2,804 | Reference           | 1,729 | Reference           |
| Agriculture                 | 569   | 0.51 (0.30, 0.86) * | 1,111 | 0.50 (0.38, 0.65)   | 737   | 0.51 (0.37, 0.71) * |
| Skilled Manual <sup>6</sup> | 325   | 0.98 (0.60, 1.60)   | 559   | 0.81 (0.61, 1.08)   | 394   | 0.72 (0.50, 1.04)   |
| Skilled <sup>7</sup>        | 1,469 | 1.22 (0.94, 1.59)   | 2,399 | 1.22 (1.04, 1.43) * | 1,550 | 0.94 (0.76, 1.15)   |

## Maternal Overweight

|                |       |                     |       |                     |       |                     |
|----------------|-------|---------------------|-------|---------------------|-------|---------------------|
| Not Overweight | 3,068 | Reference           | 3,864 | Reference           | 2,459 | Reference           |
| Overweight     | 1,664 | 1.31 (1.02, 1.67) * | 2,597 | 2.03 (1.75, 2.37) * | 1,835 | 2.18 (1.80, 2.64) * |

## Consumed in the Last Week:

*Instant Noodles*

|     |       |                     |       |                   |       |                   |
|-----|-------|---------------------|-------|-------------------|-------|-------------------|
| No  | 2,002 | Reference           | 1,616 | Reference         | 581   | Reference         |
| Yes | 2,613 | 0.69 (0.53, 0.90) * | 5,382 | 1.03 (0.87, 1.23) | 2,076 | 1.03 (0.78, 1.36) |

*Fast Food*

|     |       |                     |       |                     |       |                   |
|-----|-------|---------------------|-------|---------------------|-------|-------------------|
| No  | 3,941 | Reference           | 5,669 | Reference           | 2,209 | Reference         |
| Yes | 674   | 1.39 (1.01, 1.93) * | 1,329 | 1.43 (1.21, 1.69) * | 448   | 1.13 (0.85, 1.50) |

*Soda*

|     |       |                   |       |                   |       |                   |
|-----|-------|-------------------|-------|-------------------|-------|-------------------|
| No  | 4,342 | Reference         | 5,942 | Reference         | 2,011 | Reference         |
| Yes | 273   | 0.89 (0.50, 1.59) | 1,056 | 1.17 (0.97, 1.42) | 646   | 1.09 (0.84, 1.41) |

*Fried Snacks*

|     |       |                   |       |                   |       |                   |
|-----|-------|-------------------|-------|-------------------|-------|-------------------|
| No  | 2,393 | Reference         | 2,531 | Reference         | 825   | Reference         |
| Yes | 2,222 | 0.83 (0.64, 1.08) | 4,467 | 1.12 (0.96, 1.31) | 1,832 | 0.99 (0.78, 1.26) |

## Mean Number of Days

Consumed in the Last Week<sup>8</sup>:

|                 |       |                   |       |                   |       |                   |
|-----------------|-------|-------------------|-------|-------------------|-------|-------------------|
| Instant Noodles | 2,613 | 1.00 (0.91, 1.10) | 5,382 | 0.99 (0.95, 1.03) | 2,076 | 0.99 (0.93, 1.05) |
|-----------------|-------|-------------------|-------|-------------------|-------|-------------------|

## Online Supplemental Material

|              |       |                   |       |                   |       |                   |
|--------------|-------|-------------------|-------|-------------------|-------|-------------------|
| Fast Food    | 674   | 0.88 (0.74, 1.05) | 1,329 | 0.91 (0.83, 1.00) | 448   | 0.90 (0.77, 1.05) |
| Soda         | 2,222 | 0.89 (0.51, 1.55) | 1,056 | 1.05 (0.96, 1.16) | 646   | 1.10 (0.98, 1.24) |
| Fried Snacks | 3,671 | 0.97 (0.89, 1.05) | 4,467 | 0.98 (0.94, 1.01) | 1,832 | 0.97 (0.92, 1.03) |

Food Expenditures<sup>9</sup>*Rice*

|         |       |                   |       |                   |       |                   |
|---------|-------|-------------------|-------|-------------------|-------|-------------------|
| Lowest  | 2,469 | Reference         | 3,334 | Reference         | 2,151 | Reference         |
| Highest | 2,489 | 1.15 (0.91, 1.46) | 3,662 | 0.86 (0.75, 1.00) | 2,704 | 0.93 (0.78, 1.11) |

*Cooking oil*

|         |       |                   |       |                   |       |                   |
|---------|-------|-------------------|-------|-------------------|-------|-------------------|
| Lowest  | 2,992 | Reference         | 3,993 | Reference         | 2,785 | Reference         |
| Highest | 1,966 | 1.23 (0.97, 1.57) | 3,002 | 1.16 (1.00, 1.34) | 2,071 | 1.11 (0.93, 1.33) |

## Residence

|       |       |                     |       |                     |       |                     |
|-------|-------|---------------------|-------|---------------------|-------|---------------------|
| Rural | 2,083 | Reference           | 2,915 | Reference           | 1,969 | Reference           |
| Urban | 2,882 | 1.57 (1.22, 2.02) * | 4,097 | 2.01 (1.72, 2.35) * | 2,899 | 1.71 (1.42, 2.07) * |

## Wealth

|         |       |                   |       |                     |     |                   |
|---------|-------|-------------------|-------|---------------------|-----|-------------------|
| Lowest  | 1,008 | Reference         | 1,247 | Reference           | 876 | Reference         |
| Second  | 964   | 1.37 (0.91, 2.06) | 1,193 | 1.50 (1.14, 1.98) * | 802 | 1.12 (0.83, 1.52) |
| Middle  | 654   | 1.25 (0.79, 1.98) | 908   | 1.78 (1.34, 2.36) * | 566 | 1.06 (0.76, 1.48) |
| Fourth  | 783   | 1.42 (0.93, 2.15) | 1,037 | 1.64 (1.25, 2.15) * | 617 | 1.08 (0.77, 1.51) |
| Highest | 656   | 1.37 (0.89, 2.11) | 993   | 1.83 (1.39, 2.40) * | 617 | 1.12 (0.82, 1.54) |

## Family Size

|     |       |                   |       |                     |       |                     |
|-----|-------|-------------------|-------|---------------------|-------|---------------------|
| ≤ 4 | 2,645 | Reference         | 3,523 | Reference           | 2,322 | Reference           |
| > 4 | 2,320 | 0.99 (0.78, 1.26) | 3,489 | 0.75 (0.65, 0.87) * | 2,546 | 0.83 (0.70, 0.99) * |

CI = confidence interval; na = not applicable

<sup>1</sup> Overweight is defined as weight-for-height z-score > 2 using the MGRS Standard, estimated using logistic regression models and are weighted to account for the survey design

<sup>2</sup> Overweight is defined as BMI z-score > 1 using the WHO reference, estimated using logistic regression models and are weighted to account for the survey design

<sup>3</sup> Modelled as a continuous variable

## Online Supplemental Material

1

<sup>4</sup> Breastfeeding data are reported by the mother retrospectively. Exclusively breastfed indicates whether the child was only given breastmilk (no water or complementary foods) when the child was aged 0-6 months. Complementary foods indicate appropriate timing of complementary foods, that is, the introduction of complementary foods when the child was 6-8 months old.

<sup>5</sup> Parental characteristics are of the mother, when available. When not available the characteristic is based on the father's data

<sup>6</sup> Skilled manual labor combines the following employment sectors: mining, manufacturing, electric, gas, water maintenance, and construction

<sup>7</sup> Skilled labor combines the following employment sectors: retail and service, transportation

<sup>8</sup> Modelled as a continuous variable, the average number of days consumed is queried if the respondent reported that they consumed item during the last week

<sup>9</sup> Indicates the household level expenditure on each item as a percentage of the households' total expenditures on food

For peer review only

1  
2  
3  
4  
5  
6  
7  
8  
9  
10  
11  
12  
13  
14  
15  
16  
17  
18  
19  
20  
21  
22  
23  
24  
25  
26  
27  
28  
29  
30  
31  
32  
33  
34  
35  
36  
37  
38  
39  
40  
41  
42  
43  
44  
45  
46  
47  
48  
49  
50  
51  
52  
53  
54  
55  
56  
57  
58  
59  
60STROBE Statement—Checklist of items that should be included in reports of *cross-sectional studies*

|                              | <b>Item No</b> | <b>Recommendation</b>                                                                                                                                                                             | <b>Page Number</b>                                                                                                                |
|------------------------------|----------------|---------------------------------------------------------------------------------------------------------------------------------------------------------------------------------------------------|-----------------------------------------------------------------------------------------------------------------------------------|
| <b>Title and abstract</b>    | 1              | (a) Indicate the study's design with a commonly used term in the title or the abstract                                                                                                            | Page 2                                                                                                                            |
|                              |                | (b) Provide in the abstract an informative and balanced summary of what was done and what was found                                                                                               | Page 2                                                                                                                            |
| <b>Introduction</b>          |                |                                                                                                                                                                                                   |                                                                                                                                   |
| Background/rationale         | 2              | Explain the scientific background and rationale for the investigation being reported                                                                                                              | Pages 4-5                                                                                                                         |
| Objectives                   | 3              | State specific objectives, including any prespecified hypotheses                                                                                                                                  | Page 5                                                                                                                            |
| <b>Methods</b>               |                |                                                                                                                                                                                                   |                                                                                                                                   |
| Study design                 | 4              | Present key elements of study design early in the paper                                                                                                                                           | Pages 5,9                                                                                                                         |
| Setting                      | 5              | Describe the setting, locations, and relevant dates, including periods of recruitment, exposure, follow-up, and data collection                                                                   | Page 5                                                                                                                            |
| Participants                 | 6              | (a) Give the eligibility criteria, and the sources and methods of selection of participants                                                                                                       | Pages 5,9                                                                                                                         |
| Variables                    | 7              | Clearly define all outcomes, exposures, predictors, potential confounders, and effect modifiers. Give diagnostic criteria, if applicable                                                          | Pages 7-8                                                                                                                         |
| Data sources/<br>measurement | 8*             | For each variable of interest, give sources of data and details of methods of assessment (measurement). Describe comparability of assessment methods if there is more than one group              | Pages 5-7                                                                                                                         |
| Bias                         | 9              | Describe any efforts to address potential sources of bias                                                                                                                                         | Page 9                                                                                                                            |
| Study size                   | 10             | Explain how the study size was arrived at                                                                                                                                                         | Page 9, see flow chart                                                                                                            |
| Quantitative variables       | 11             | Explain how quantitative variables were handled in the analyses. If applicable, describe which groupings were chosen and why                                                                      | Page 8                                                                                                                            |
| Statistical methods          | 12             | (a) Describe all statistical methods, including those used to control for confounding                                                                                                             | Pages 8-9                                                                                                                         |
|                              |                | (b) Describe any methods used to examine subgroups and interactions                                                                                                                               | Page 9                                                                                                                            |
|                              |                | (c) Explain how missing data were addressed                                                                                                                                                       | Not applicable                                                                                                                    |
|                              |                | (d) If applicable, describe analytical methods taking account of sampling strategy                                                                                                                | Page 9                                                                                                                            |
|                              |                | (e) Describe any sensitivity analyses                                                                                                                                                             | Page 9                                                                                                                            |
| <b>Results</b>               |                |                                                                                                                                                                                                   |                                                                                                                                   |
| Participants                 | 13*            | (a) Report numbers of individuals at each stage of study—eg numbers potentially eligible, examined for eligibility, confirmed eligible, included in the study, completing follow-up, and analysed | For this secondary data analysis, individuals were included if they had complete data for the exposure, outcome, and confounders. |

|                          |     |                                                                                                                                                                                                              |                                                                                                                                                              |
|--------------------------|-----|--------------------------------------------------------------------------------------------------------------------------------------------------------------------------------------------------------------|--------------------------------------------------------------------------------------------------------------------------------------------------------------|
|                          |     | (b) Give reasons for non-participation at each stage                                                                                                                                                         | For this secondary data analysis, individuals were included if they had complete data for the exposure, outcome, and confounders.                            |
|                          |     | (c) Consider use of a flow diagram                                                                                                                                                                           | See Supplemental Figure 1                                                                                                                                    |
| Descriptive data         | 14* | (a) Give characteristics of study participants (eg demographic, clinical, social) and information on exposures and potential confounders                                                                     | Pages 9-11                                                                                                                                                   |
|                          |     | (b) Indicate number of participants with missing data for each variable of interest                                                                                                                          | See Supplemental Figure 1. For this secondary data analysis, individuals were included if they had complete data for the exposure, outcome, and confounders. |
| Outcome data             | 15* | Report numbers of outcome events or summary measures                                                                                                                                                         | Pages 9, Figure 1                                                                                                                                            |
| Main results             | 16  | (a) Give unadjusted estimates and, if applicable, confounder-adjusted estimates and their precision (eg, 95% confidence interval). Make clear which confounders were adjusted for and why they were included | Provided in supplemental material                                                                                                                            |
|                          |     | (b) Report category boundaries when continuous variables were categorized                                                                                                                                    | Page 8, Tables 1-6                                                                                                                                           |
|                          |     | (c) If relevant, consider translating estimates of relative risk into absolute risk for a meaningful time period                                                                                             | Not applicable                                                                                                                                               |
| Other analyses           | 17  | Report other analyses done—eg analyses of subgroups and interactions, and sensitivity analyses                                                                                                               | Supplemental Tables 4 and 5                                                                                                                                  |
| <b>Discussion</b>        |     |                                                                                                                                                                                                              |                                                                                                                                                              |
| Key results              | 18  | Summarise key results with reference to study objectives                                                                                                                                                     | Page 13-15                                                                                                                                                   |
| Limitations              | 19  | Discuss limitations of the study, taking into account sources of potential bias or imprecision. Discuss both direction and magnitude of any potential bias                                                   | Page 16                                                                                                                                                      |
| Interpretation           | 20  | Give a cautious overall interpretation of results considering objectives, limitations, multiplicity of analyses, results from similar studies, and other relevant evidence                                   | Pages 13-15                                                                                                                                                  |
| Generalisability         | 21  | Discuss the generalisability (external validity) of the study results                                                                                                                                        | Page 16                                                                                                                                                      |
| <b>Other information</b> |     |                                                                                                                                                                                                              |                                                                                                                                                              |
| Funding                  | 22  | Give the source of funding and the role of the funders for the present study and, if applicable, for the original study on which the present article is based                                                | Not applicable                                                                                                                                               |

1  
2 \*Give information separately for exposed and unexposed groups.  
3

4 **Note:** An Explanation and Elaboration article discusses each checklist item and gives methodological background and  
5 published examples of transparent reporting. The STROBE checklist is best used in conjunction with this article (freely  
6 available on the Web sites of PLoS Medicine at <http://www.plosmedicine.org/>, Annals of Internal Medicine at  
7 <http://www.annals.org/>, and Epidemiology at <http://www.epidem.com/>). Information on the STROBE Initiative is  
8 available at [www.strobe-statement.org](http://www.strobe-statement.org).  
9  
10  
11  
12  
13  
14  
15  
16  
17  
18  
19  
20  
21  
22  
23  
24  
25  
26  
27  
28  
29  
30  
31  
32  
33  
34  
35  
36  
37  
38  
39  
40  
41  
42  
43  
44  
45  
46  
47  
48  
49  
50  
51  
52  
53  
54  
55  
56  
57  
58  
59  
60

For peer review only

# BMJ Open

## Overweight in Indonesia: an observational study of trends and risk factors among adults and children

|                                 |                                                                                                               |
|---------------------------------|---------------------------------------------------------------------------------------------------------------|
| Journal:                        | <i>BMJ Open</i>                                                                                               |
| Manuscript ID                   | bmjopen-2019-031198.R1                                                                                        |
| Article Type:                   | Original research                                                                                             |
| Date Submitted by the Author:   | 07-Aug-2019                                                                                                   |
| Complete List of Authors:       | Oddo, Vanessa; University of Washington School of Public Health, Maehara, Masumi ; UNICEF<br>Rah, Jee; UNICEF |
| <b>Primary Subject Heading</b>: | Nutrition and metabolism                                                                                      |
| Secondary Subject Heading:      | Global health, Public health                                                                                  |
| Keywords:                       | Overweight, Indonesia, Nutrition Transition, Indonesian Family Life Survey                                    |
|                                 |                                                                                                               |

SCHOLARONE™  
Manuscripts



1  
2  
3  
4  
5  
6  
7  
8  
9 **Overweight in Indonesia: an observational study of trends and risk factors among adults**  
10  
11 **and children**  
12  
13  
14  
15

16 Vanessa M. Oddo<sup>1</sup>, Masumi Maehara<sup>2</sup>, Jee Hyun Rah<sup>2</sup>  
17  
18  
19  
20  
21

22 <sup>1</sup>University of Washington School of Public Health, Department of Health Services, Seattle  
23  
24 Washington, USA  
25

26  
27 <sup>2</sup>Child Survival and Development, United Nations Children's Fund, Jakarta, Indonesia  
28  
29

30 **Corresponding Author:**

31 Vanessa M. Oddo  
32 University of Washington School of Public Health  
33 Department of Health Services  
34 330 Raitt Hall  
35 Seattle, WA 98195  
36 E: [voddo@uw.edu](mailto:voddo@uw.edu)  
37 P: 206-685-8723  
38  
39  
40  
41

42 **Word Count: 4310**  
43  
44  
45  
46  
47  
48  
49  
50  
51  
52  
53  
54  
55  
56  
57  
58  
59  
60

## ABSTRACT

**Objective:** To conduct a secondary data analysis detailing overweight prevalence and associations between key hypothesized determinants and overweight.

**Design:** This observational study used publicly available data from the Indonesian Family Life Survey (IFLS) (1993-2014). The IFLS is a home-based survey of adults and children that collected data on household characteristics (size, physical infrastructure, assets, food expenditures), as well as individual-level educational attainment, occupation type, smoking status, and marital status. These analyses utilized data on the self-reported consumption of ultra-processed foods and physical activity. Anthropometrics were measured.

**Setting:** Indonesia.

**Primary Outcome Measures:** We described the distribution of overweight by gender among adults (body mass index [BMI]  $\geq 25$  kg/m<sup>2</sup>) and by age among children, over time. Overweight was defined as weight-for-height z-score  $> 2$ , among children aged 0-5 years and as BMI-for-age z-score  $> 1$ , among children aged 6-18 years. We also described individuals who were overweight by selected characteristics over time. Finally, we employed multivariable logistic regression models to investigate risk factors in relation to overweight in 2014.

**Results:** One-third of adults were overweight in 2014. Between 1993 and 2014 the prevalence of overweight among adults doubled from 17.1% to 33.0%. The prevalence of overweight among children under-five years increased from 4.2% to 9.4% between 1993 and 2007, but then remained relatively stagnant between 2007 and 2014. Among children aged 6-12 years and 13-18 years, the prevalence of overweight increased from 5.1% to 15.6% and from 7.1% to 14.1% between 1993 and 2014, respectively. Although overweight prevalence remains higher in urban areas, the increase in overweight prevalence was larger among rural (versus urban) residents, and by 2014,

1  
2  
3 the proportions of overweight adults were evenly distributed in each wealth quintile. Data suggest  
4  
5 that the consumption of ultra-processed foods was common and levels of physical activity have  
6  
7 decreased over the last decade. In multivariable models, urban area residence, higher wealth,  
8  
9 higher education, and consumption of ultra-processed foods were associated with higher odds of  
10  
11 overweight among most adults and children.  
12  
13

14  
15 **Conclusions:** Urgent program and policy action is needed to reduce and prevent overweight  
16  
17 among all ages.  
18  
19

20 **Key Words:** Overweight, Indonesia, nutrition transition, Indonesian Family Life Survey  
21  
22  
23  
24  
25  
26  
27  
28  
29  
30  
31  
32  
33  
34  
35  
36  
37  
38  
39  
40  
41  
42  
43  
44  
45  
46  
47  
48  
49  
50  
51  
52  
53  
54  
55  
56  
57  
58  
59  
60

## Strengths and Limitations of this Study

- A key study strength is that we are able to compare overweight trends over time among all age groups, explore the consumption of ultra-processed foods and physical activity, and investigate hypothesized risk factors for overweight, using regression-based methods.
- We use a recent dataset that is nationally representative of Indonesia.
- A key limitation is that we largely employ cross-sectional data, and therefore, we cannot infer any causal associations.
- Data on the consumption of a select number of ultra-processed foods was only collected in 2014, which limits our ability to make conclusions about the association between ultra-processed foods and overweight.
- Physical activity levels were based on respondent recall.

## INTRODUCTION

Indonesia is undergoing a nutrition transition as one-third of adults are now overweight or obese. Nutrition transition theory suggests that economic development, urbanization, and globalization result in an increase in the consumption of ultra-processed foods and a decrease in physical activity [1,2], which subsequently lead to a higher prevalence of overweight and non-communicable diseases. Context specific policy, food systems, sociocultural norms, and socioeconomics are also thought to play a role [2]. Mitigating the obesity pandemic through appropriate programs and policies requires a better understanding of setting-specific trends and their underlying determinants. Yet, prior studies provide limited information on the changing prevalence and risk factors for overweight, by age group, in Indonesia. We aimed to fill this gap in the literature by detailing overweight prevalence over time and investigating the relation between key risk factors and overweight, among all age groups in Indonesia.

Several factors have likely contributed to the increasing prevalence of overweight in Indonesia. First, economic development, urbanization, and globalization have altered the food environment in Indonesia [3], as these factors result in easier access to and demand for processed foods [4,5]. In Indonesia, food availability per capita has increased by 40% over the last two decades, which is largely driven by an increase in the availability of fats (e.g. palm oil) [6]. Subsequently, poor dietary habits are now common among Indonesians. Data from the 2013 National Basic Health Research Survey indicated inadequate consumption of fruits and vegetables among the majority of Indonesians, and one prior study reported that higher consumption of meat and dairy was associated with a higher prevalence of obesity in Indonesia [7]. Prior evidence from Indonesia and the Southeast Asia region also suggests widespread consumption of ultra-processed foods and a positive association between consumption of processed foods, meat, dairy, and

1  
2  
3 “Western foods” and overweight prevalence among children and adults [6–8]. Second, economic  
4 development and urbanization also result in decreased physical activity and the Indonesian  
5 population is increasingly adopting a more sedentary lifestyle [9–12]. In part, this is due to changes  
6 in technology, which have led to more mechanized agricultural production and shifts away from  
7 agricultural-based employment. In addition, Indonesians perceive that increased motorized  
8 transport and rapid changes in the built environment have resulted in reduced physical activity  
9 [13]. Limited data also suggest that there are few bike lanes, sidewalks, or parks in Indonesia [6].

10  
11  
12  
13  
14  
15  
16  
17  
18  
19  
20 The objectives of this study were two-fold. First, we document the changes in overweight  
21 prevalence that have occurred in Indonesia, between 1993 and 2014, among adults (aged  $\geq 19$   
22 years), adolescents (aged 13-18 years), school-aged children (aged 6-12 years), and young children  
23 (aged 0-5 years). Second, this study provides a comprehensive examination of risk factors for  
24 overweight, by age, using regression-based methods. We believe the evidence will be useful for  
25 future advocacy efforts on obesity prevention and to inform relevant policy dialogues and program  
26 design.  
27  
28  
29  
30  
31  
32  
33  
34  
35

## 36 **METHODS**

### 37 **Study Context**

38  
39  
40  
41  
42 Indonesia is the world’s fourth most populous country, home to approximately 260 million  
43 individuals, and is the largest economy in Southeast Asia [14]. Indonesia’s gross domestic product  
44 per capita has steadily risen, from \$807 in the year 2000 to \$3,877 in 2018 [15]. Over the last forty  
45 years, Indonesia has experienced a process of rapid urbanization and industrialization, which have  
46 contributed to Indonesia’s changing infrastructure. More than half of the population now live in  
47 an urban area and urbanization is increasing at a rate of 2.3% annually. Economic development  
48 and urbanization are related to changes in diet and physical activity. At the same time, the  
49  
50  
51  
52  
53  
54  
55  
56  
57  
58  
59  
60

1  
2  
3 demographic transition (i.e. the shift from a pattern of high fertility and high mortality to one of  
4 low fertility and low mortality) affects and is affected by nutritional change. Indonesia is in the  
5 middle phase of their demographic transition, expecting to harness the peak of demographic  
6 dividend between 2020 and 2030 [16].  
7  
8  
9  
10  
11  
12

### 13 **Survey Design and Study Population**

14  
15  
16 These analyses utilized the publicly available Indonesian Family Life Survey (IFLS),  
17 which has previously been detailed elsewhere [17,18]. The IFLS is a longitudinal, home-based  
18 survey that collected socioeconomic and health data on individual respondents including children  
19 aged 0-18 years and adults  $\geq 19$ , and their households over time. The survey was first fielded in  
20 1993 and there have been four subsequent rounds of data collection (1997, 2000, 2007, 2014).  
21 Follow-up surveys were fielded on the full sample and split-off households. Therefore, new  
22 members were added to the panel during each subsequent survey wave.  
23  
24  
25  
26  
27  
28  
29  
30  
31  
32

33  
34 As described in detail elsewhere [17], the original, multi-stage sampling frame was based  
35 on households from 13 out of 27 Indonesian provinces: North Sumatra, West Sumatra, South  
36 Sumatra, Lampung, DKI Jakarta, West Java, Central Java, Yogyakarta, East Java, Bali, West Nusa  
37 Tenggara, South Kalimantan, and South Sulawesi. These provinces were selected to maximize  
38 representation of the population, capture the cultural and socioeconomic diversity of Indonesia,  
39 and be cost-effective. The sample represented approximately 83% of the Indonesian population in  
40 1993 [17]. Within each of the 13 provinces, 321 enumeration areas were randomly chosen from  
41 the nationally representative sample frame used in the 1993 National Socioeconomic Survey.  
42 Urban areas were over-sampled in the original survey; 20 households were randomly selected from  
43 each urban enumeration area and 30 households were randomly selected from each rural  
44  
45  
46  
47  
48  
49  
50  
51  
52  
53  
54  
55  
56  
57  
58  
59  
60

1  
2  
3 enumeration area. Original and split-off households were re-contacted in subsequent survey waves.  
4  
5 Indonesia now has 34 provinces, as eight have been added since 1999. As individuals moved  
6  
7 between provinces within Indonesia over time, additional provinces were represented in the  
8  
9 survey. In 2014, 24 provinces were represented.  
10  
11  
12

13  
14 The IFLS was approved by Institutional Review Boards in the United States at RAND  
15  
16 Corporation and in Indonesia at the University of Gadjah Mada. Survey participants provided  
17  
18 written informed consent. A parent or guardian (typically the mother) provided informed consent  
19  
20 for children younger than age 11 [19]. The data used for this study are retrospective and the authors  
21  
22 did not have access to any identifying information. As such, ethical approval was not required.  
23  
24  
25

## 26 **Survey Questions**

27  
28  
29 Many questions were consistently asked during each survey wave, but some were added or  
30  
31 eliminated over the 20-year survey period to reflect the changing economic context. The household  
32  
33 questionnaire collected information on household characteristics such as its size, physical  
34  
35 infrastructure, access to sanitation and water sources, assets, and food expenditures (see  
36  
37 Supplemental Table 1). Each adult respondent was asked about characteristics related to  
38  
39 demographics (e.g. marital status, age), socioeconomic status (e.g. educational attainment,  
40  
41 occupation) and health history (e.g. smoking). Beginning in 2000, adults were also asked about  
42  
43 their food intake in the past week; specifically, respondents indicated whether they ate each food  
44  
45 type (e.g. in the last week, did you eat any [...]) and the frequency of consumption (e.g. how many  
46  
47 days in a week did you eat [...] in the last week). In 2000 and 2007, self-reported diet questions  
48  
49 focused on staple foods (e.g. rice, eggs, dairy) and iron- and vitamin-A rich foods (e.g. meat, green  
50  
51 leafy vegetables, carrots, sweet potatoes). Ultra-processed (instant noodles, fast food, soft drinks,  
52  
53  
54  
55  
56  
57  
58  
59  
60



1  
2  
3 fried snacks) were added in 2014. In addition, married women were asked about their reproductive  
4 history and breastfeeding and complementary feeding practices for children born within the five  
5 years prior to the survey.  
6  
7  
8  
9

10  
11 In 2007 and 2014, adults were asked about the type, duration (< 2 hours or ≥ 2 hours), and  
12 number of days of physical activities they engaged during the last week. Activity type included  
13 vigorous activity, moderate activity, and walking, using a modified version of the International  
14 Survey on Physical Activities. Vigorous physical activity was defined as any activities that make  
15 you breathe much harder than normal (e.g. heavy lifting, digging, cycling with loads). Moderate  
16 physical activity was defined as any activities that make you breathe somewhat harder than normal  
17 (e.g. carrying light loads, bicycling, or mopping the floor). Walking included at work and at home,  
18 walking from place to place, and walking for recreation.  
19  
20  
21  
22  
23  
24  
25  
26  
27  
28  
29

30 The child questionnaire paralleled the adult questionnaire, with age-appropriate  
31 modifications. Specifically, information was collected on age, gender, educational attainment,  
32 morbidities, and food frequency. Physical activity was not collected among children. For children  
33 younger than 11, the mother, female guardian, or household caretaker answered the questions.  
34  
35  
36  
37  
38  
39 Children aged ≥ 11 years were allowed to respond for themselves.  
40  
41

42 Height and weight were measured for adults and children by trained interviewers, using a  
43 rigorous research protocol [17]. Interviewers completed both didactic and hands-on  
44 anthropometric training and after completing each questionnaire and measurements in the field,  
45  
46  
47  
48  
49  
50  
51  
52  
53  
54  
55  
56  
57  
58  
59  
60

board. Recumbent height was measured among children aged < 24 months. Weight was measured to the nearest one-tenth of a kilogram using a Camry model EB1003 scale.

### Statistical Analysis

Overweight served as our *a priori* primary endpoint. Among adults (aged  $\geq 19$  years), overweight was defined as body mass index (BMI)  $\geq 25$  kg/m<sup>2</sup>. Among children and adolescents aged 6-18 years, overweight was defined as BMI-for-age z-score  $> 1$  using the World Health Organization (WHO) reference [20]. Among children aged 0-5 years, overweight was defined as weight-for-height [WHZ] z-score  $> 2$  using the Multicentre Growth Reference Study Standard [21].

Appropriate cutoffs were applied to create dichotomous or categorical variables for age, educational attainment, and occupation. Urban/rural residence, diet, and physical activity data were modelled as binary variables. Household wealth quintiles were created using principal component analysis, using following variables: type of floor material, type of toilet, type of cooking fuel and ownership of assets including: land, livestock, vehicle(s), household appliances, furniture and utensils, jewelry, and monetary savings. Dichotomous variables were created from the aforementioned categorical variables and a frequency test was run for each of the new variables to ensure that those variables with a variance of zero were removed. The wealth score was then split into quintiles based on the distribution of the data in a given survey year.

Household food expenditures on rice and cooking oil represented the household-level expenditure on each item as a percentage of the households' total expenditures on food. Food expenditures were then dichotomized as lower and higher based on the mean value in each survey year. Rice was selected as it is a key staple food in Indonesia. Cooking oil was also selected because it has been shown to perpetuate energy imbalance.

1  
2  
3 Descriptive statistics are presented as percentages for categorical variables or means for  
4 continuous variables. The distribution of overweight by gender (adult women and adult men aged  
5 and  $\geq 19$  years) and age (0-5 years, 6-12 years, 13-18 years) was detailed for each survey year.  
6  
7 Then, we described individuals who were overweight, by the aforementioned characteristics (e.g.  
8 education, wealth), from 1993 to 2014. Finally, we described the distribution of the consumption  
9 of ultra-processed foods (2014) and of physical activity among adults (2007, 2014).  
10  
11  
12  
13  
14  
15  
16  
17

18 Prior conceptual models [2,22,23], along with the availability of data in the IFLS were used  
19 to identify plausible determinants of the obesity endemic in Indonesia. In order to create a  
20 parsimonious model, univariate analyses first explored risk factors and their association with  
21 overweight, using cross-sectional logistic regression models, for five groups in 2014: adult women,  
22 adult men, children aged 0-5 years, children aged 6-12 years, and children aged 13-18 years.  
23  
24 Largely, variables were included in multivariable models if they were statistically significantly  
25 associated with the dependent variable in univariate models (defined as  $p < 0.05$ ). Age, gender,  
26 urban/rural residence, and wealth were included in the multivariable logistic regression models  
27 irrespective of statistical significance. Pregnant women were excluded from analyses. We assessed  
28 multicollinearity in all models.  
29  
30  
31  
32  
33  
34  
35  
36  
37  
38  
39  
40  
41

42 In sensitivity analyses, we explored the association between selected risk-factors and  
43 overweight among adults, over time (1993-2014), using modified Poisson models [24]. These  
44 longitudinal models were considered sensitivity analyses because individual-level consumption of  
45 ultra-processed foods and physical activity data were not available in prior years. Alpha was set to  
46 0.05 to determine statistical significance. All analyses employed sampling weights, which account  
47 for the survey design and were performed using Stata 15.1 (StataCorp LP, College Station, TX).  
48  
49  
50  
51  
52  
53  
54  
55  
56  
57  
58  
59  
60

## Patient and Public Involvement

Neither patients nor the public were involved in this secondary data analysis.

## RESULTS

Between 1993 and 2014 the prevalence of overweight among adults doubled from 17.1% to 33.0% (Figure 1). The prevalence of overweight among children under-five years increased from 4.2% to 9.4% between 1993 and 2007, but since then, remained relatively stagnant. Among children aged 6-12 years and 13-18 years, the prevalence of overweight increased from 5.1% to 15.6% and from 7.1% to 14.1% between 1993 and 2014, respectively.

The characteristics of overweight individuals are presented in Tables 1-4 and in Supplemental Tables 2-4. More women and men over 40 years old (versus younger ages) were overweight over the study period (Tables 1-2). Most overweight women and men had at least primary school education, and more than half lived in urban areas. The distribution of wealth among overweight adults varied over time. In 1993, the largest percentage of overweight women (29.4%) was in the wealthiest households, whereas in 2014, wealth was evenly distributed (~20%). Trends were similar for men.

**Table 1. Percent Distribution of Selected Characteristics Among Overweight Adult Women Aged 19 + in Indonesia Over Time**

|            | 1993 <sup>1,2</sup> |      | 1997 <sup>1,2</sup> |      | 2000 <sup>1,2</sup> |      | 2007 <sup>1,2</sup> |      | 2014 <sup>1,2</sup> |      |
|------------|---------------------|------|---------------------|------|---------------------|------|---------------------|------|---------------------|------|
|            | n                   | %    | n                   | %    | n                   | %    | n                   | %    | n                   | %    |
| <b>Age</b> |                     |      |                     |      |                     |      |                     |      |                     |      |
| 19-29 y    | 97                  | 18.9 | 248                 | 18.7 | 423                 | 14.7 | 848                 | 15.6 | 1,197               | 10.9 |
| 30-39 y    | 253                 | 38.1 | 531                 | 32.6 | 728                 | 30.5 | 1,167               | 24.8 | 1,937               | 19.6 |
| 40-49 y    | 178                 | 25.4 | 473                 | 27.0 | 699                 | 29.9 | 1,044               | 31.1 | 1,511               | 31.9 |
| 50-59 y    | 97                  | 14.3 | 255                 | 13.2 | 342                 | 15.4 | 618                 | 17.6 | 996                 | 24.4 |
| ≥ 60 y     | 24                  | 3.3  | 169                 | 8.6  | 254                 | 9.6  | 389                 | 10.9 | 551                 | 13.2 |

### Education

|                      |     |      |       |      |       |      |       |      |       |      |
|----------------------|-----|------|-------|------|-------|------|-------|------|-------|------|
| No Education         | 39  | 7.3  | 225   | 14.5 | 276   | 11.2 | 279   | 9.1  | 263   | 6.9  |
| Primary              | 415 | 66.7 | 832   | 61.7 | 1,232 | 54.6 | 1,702 | 53.7 | 2,198 | 50.4 |
| Junior or Senior     | 152 | 20.3 | 308   | 19.4 | 711   | 27.0 | 1,109 | 28.6 | 2,077 | 32.8 |
| University           | 43  | 5.7  | 69    | 4.4  | 172   | 7.2  | 335   | 8.6  | 623   | 9.9  |
| Parity <sup>3</sup>  |     |      |       |      |       |      |       |      |       |      |
| ≤ 2                  | 16  | 15.2 | 20    | 43.1 | 71    | 20.1 | 56    | 20.1 | 428   | 35.8 |
| 3-4                  | 19  | 17.7 | 8     | 14.2 | 72    | 18.4 | 76    | 24.9 | 230   | 29.9 |
| ≥ 5                  | 84  | 67.1 | 20    | 42.7 | 254   | 61.5 | 191   | 55.0 | 306   | 34.4 |
| Smoking Status       |     |      |       |      |       |      |       |      |       |      |
| Non-Smoker           | 614 | 96.7 | 1,553 | 95.6 | 2,311 | 96.1 | 3,889 | 97.5 | 6,027 | 97.4 |
| Smoker               | 25  | 3.3  | 73    | 4.4  | 99    | 3.9  | 101   | 2.5  | 134   | 2.6  |
| Marital Status       |     |      |       |      |       |      |       |      |       |      |
| Never Married        | 10  | 2.8  | 85    | 5.0  | 146   | 4.8  | 237   | 4.9  | 291   | 3.1  |
| Married              | 582 | 89.1 | 1,336 | 82.7 | 1,926 | 80.4 | 3,298 | 81.9 | 5,185 | 81.7 |
| Other                | 49  | 8.1  | 220   | 12.3 | 351   | 14.8 | 475   | 13.2 | 714   | 15.2 |
| Employment           |     |      |       |      |       |      |       |      |       |      |
| Not working          | 362 | 57.0 | 803   | 50.8 | 969   | 39.8 | 1,527 | 37.6 | 2,178 | 35.2 |
| Agriculture          | 27  | 5.5  | 135   | 8.8  | 260   | 11.6 | 517   | 14.5 | 816   | 15.6 |
| Skilled              |     |      |       |      |       |      |       |      |       |      |
| Manual <sup>4</sup>  | 44  | 6.2  | 141   | 9.3  | 201   | 9.3  | 315   | 8.2  | 479   | 8.4  |
| Skilled <sup>5</sup> | 202 | 31.3 | 545   | 31.1 | 956   | 39.2 | 1,616 | 39.7 | 2,618 | 40.8 |
| Residence            |     |      |       |      |       |      |       |      |       |      |
| Rural                | 150 | 33.4 | 583   | 43.0 | 893   | 41.5 | 1,604 | 47.3 | 2,286 | 46.0 |
| Urban                | 499 | 66.6 | 1,093 | 57.0 | 1,553 | 58.5 | 2,462 | 52.7 | 3,906 | 54.0 |
| Wealth               |     |      |       |      |       |      |       |      |       |      |
| Lowest               | 81  | 14.4 | 238   | 17.3 | 323   | 15.2 | 603   | 16.3 | 1,095 | 23.0 |
| Second               | 64  | 10.3 | 233   | 16.9 | 388   | 19.5 | 875   | 27.6 | 1,087 | 22.7 |
| Middle               | 163 | 21.0 | 312   | 23.4 | 430   | 20.9 | 521   | 15.8 | 781   | 17.3 |
| Fourth               | 203 | 24.9 | 270   | 19.9 | 426   | 20.8 | 679   | 20.4 | 894   | 18.7 |
| Highest              | 645 | 29.4 | 330   | 22.5 | 475   | 23.5 | 645   | 19.9 | 848   | 18.3 |
| Family Size          |     |      |       |      |       |      |       |      |       |      |
| ≤ 4                  | 249 | 40.2 | 533   | 33.3 | 1,161 | 48.8 | 1,274 | 30.2 | 3,898 | 65.3 |
| > 4                  | 400 | 59.8 | 1,143 | 66.7 | 1,285 | 51.2 | 2,792 | 69.8 | 2,294 | 34.7 |
| Province             |     |      |       |      |       |      |       |      |       |      |

|                                      |     |      |     |      |       |      |       |      |       |      |
|--------------------------------------|-----|------|-----|------|-------|------|-------|------|-------|------|
| Bali                                 | 78  | 18.6 | 213 | 13.0 | 305   | 14.0 | 522   | 16.8 | 774   | 17.0 |
| Central Java                         | 107 | 26.0 | 243 | 22.7 | 369   | 24.2 | 576   | 24.3 | 885   | 25.1 |
| West Java                            | 92  | 20.4 | 272 | 23.5 | 416   | 25.6 | 606   | 19.4 | 955   | 19.8 |
| Other                                | 372 | 36.7 | 948 | 46.8 | 1,353 | 40.2 | 2171  | 42.1 | 3,232 | 40.8 |
| <b>Food Expenditures<sup>6</sup></b> |     |      |     |      |       |      |       |      |       |      |
| <i>Rice</i>                          |     |      |     |      |       |      |       |      |       |      |
| Lowest                               | 186 | 49.5 | 880 | 53.1 | 1,242 | 51.6 | 2,114 | 53.2 | 3,137 | 53.0 |
| Highest                              | 205 | 50.5 | 790 | 46.9 | 1,198 | 48.4 | 1,951 | 46.8 | 3,051 | 47.0 |
| <i>Cooking oil</i>                   |     |      |     |      |       |      |       |      |       |      |
| Lowest                               | 198 | 42.5 | 786 | 49.3 | 1,174 | 48.6 | 1,827 | 45.4 | 3,562 | 58.6 |
| Highest                              | 340 | 57.5 | 882 | 50.7 | 1,266 | 51.4 | 2,238 | 54.6 | 2,625 | 41.4 |

<sup>1</sup> Overweight is defined as body mass index  $\geq 25\text{kg/m}^2$ . Percentages are weighted to be representative of the population of Indonesia in the given survey year

<sup>2</sup> Excludes women who are currently pregnant

<sup>3</sup> Parity is only queried among ever-married women

<sup>4</sup> Skilled manual labor combines the following employment sectors: mining, manufacturing, electric, gas, water maintenance, and construction

<sup>5</sup> Skilled labor combines the following employment sectors: retail and service, transportation

<sup>6</sup> Represents the household level expenditure on each item as a percentage of the households' total expenditures on food

**Table 2. Percent Distribution of Selected Characteristics Among Overweight Men Aged 19 + in Indonesia Over Time**

|                       | 1993 <sup>1</sup> |      | 1997 <sup>1</sup> |      | 2000 <sup>1</sup> |      | 2007 <sup>1</sup> |      | 2014 <sup>1</sup> |      |
|-----------------------|-------------------|------|-------------------|------|-------------------|------|-------------------|------|-------------------|------|
|                       | n                 | %    | n                 | %    | n                 | %    | n                 | %    | n                 | %    |
| <b>Age</b>            |                   |      |                   |      |                   |      |                   |      |                   |      |
| 19-29 y               | 27                | 7.3  | 88                | 13.4 | 224               | 14.1 | 419               | 15.6 | 573               | 16.5 |
| 30-39 y               | 117               | 34.3 | 196               | 30.7 | 356               | 28.7 | 698               | 24.6 | 1,048             | 21.7 |
| 40-49 y               | 121               | 33.4 | 215               | 32.0 | 336               | 31.8 | 549               | 30.6 | 885               | 25.4 |
| 50-59 y               | 52                | 14.4 | 123               | 16.1 | 184               | 17.2 | 326               | 20.7 | 514               | 25.0 |
| $\geq 60$ y           | 35                | 10.6 | 62                | 7.8  | 99                | 8.2  | 164               | 8.5  | 262               | 11.4 |
| <b>Education</b>      |                   |      |                   |      |                   |      |                   |      |                   |      |
| No Education          | 6                 | 2.0  | 24                | 3.8  | 32                | 2.5  | 32                | 1.8  | 39                | 1.8  |
| Primary               | 153               | 44.6 | 227               | 40.8 | 385               | 34.2 | 553               | 34.5 | 725               | 32.4 |
| Junior or Senior      | 124               | 37.9 | 210               | 35.6 | 519               | 43.0 | 805               | 42.6 | 1,288             | 45.0 |
| University            | 68                | 15.5 | 112               | 19.8 | 247               | 20.3 | 386               | 21.1 | 612               | 20.8 |
| <b>Smoking Status</b> |                   |      |                   |      |                   |      |                   |      |                   |      |
| Non-Smoker            | 163               | 44.9 | 289               | 41.3 | 527               | 44.8 | 897               | 43.6 | 1,481             | 46.5 |
| Smoker                | 181               | 55.1 | 371               | 58.7 | 651               | 55.2 | 1,212             | 56.4 | 1,779             | 53.5 |
| <b>Marital Status</b> |                   |      |                   |      |                   |      |                   |      |                   |      |
| Never Married         | 4                 | 3.0  | 54                | 8.2  | 131               | 8.6  | 218               | 8.9  | 353               | 9.6  |
| Married               | 342               | 96.8 | 605               | 90.4 | 1,031             | 89.7 | 1,850             | 88.2 | 2,833             | 87.1 |

|    |                             |     |      |     |      |     |      |       |      |       |      |
|----|-----------------------------|-----|------|-----|------|-----|------|-------|------|-------|------|
| 1  |                             |     |      |     |      |     |      |       |      |       |      |
| 2  |                             |     |      |     |      |     |      |       |      |       |      |
| 3  | Other                       | 1   | 0.2  | 11  | 1.4  | 22  | 1.7  | 56    | 2.9  | 95    | 3.3  |
| 4  |                             |     |      |     |      |     |      |       |      |       |      |
| 5  | Employment                  |     |      |     |      |     |      |       |      |       |      |
| 6  | Not working                 | 34  | 12.4 | 70  | 9.8  | 84  | 7.4  | 165   | 8.7  | 248   | 8.7  |
| 7  | Agriculture                 | 27  | 9.9  | 100 | 15.2 | 179 | 15.8 | 328   | 16.1 | 500   | 16.7 |
| 8  | Skilled Manual <sup>2</sup> | 87  | 25.8 | 123 | 19.7 | 199 | 17.5 | 377   | 17.7 | 598   | 18.8 |
| 9  | Skilled Labour <sup>3</sup> | 185 | 51.9 | 366 | 55.4 | 687 | 59.4 | 1,231 | 57.6 | 1,874 | 55.9 |
| 10 |                             |     |      |     |      |     |      |       |      |       |      |
| 11 |                             |     |      |     |      |     |      |       |      |       |      |
| 12 | Residence                   |     |      |     |      |     |      |       |      |       |      |
| 13 | Rural                       | 73  | 33.5 | 211 | 35.7 | 381 | 36.0 | 717   | 39.0 | 987   | 37.4 |
| 14 | Urban                       | 279 | 66.5 | 473 | 64.3 | 818 | 64.0 | 1,439 | 61.0 | 2,294 | 62.6 |
| 15 |                             |     |      |     |      |     |      |       |      |       |      |
| 16 | Wealth                      |     |      |     |      |     |      |       |      |       |      |
| 17 | Lowest                      | 22  | 7.3  | 82  | 11.8 | 130 | 10.9 | 324   | 15.6 | 547   | 19.9 |
| 18 | Second                      | 26  | 6.7  | 88  | 14.1 | 166 | 16.1 | 460   | 23.9 | 562   | 20.1 |
| 19 | Middle                      | 61  | 18.7 | 135 | 22.5 | 214 | 19.4 | 304   | 15.5 | 445   | 17.0 |
| 20 | Fourth                      | 72  | 20.6 | 118 | 19.7 | 267 | 23.8 | 418   | 22.1 | 554   | 19.9 |
| 21 | Highest                     | 169 | 46.6 | 205 | 31.9 | 315 | 29.8 | 418   | 22.9 | 661   | 23.1 |
| 22 |                             |     |      |     |      |     |      |       |      |       |      |
| 23 |                             |     |      |     |      |     |      |       |      |       |      |
| 24 |                             |     |      |     |      |     |      |       |      |       |      |
| 25 | Family Size                 |     |      |     |      |     |      |       |      |       |      |
| 26 | ≤ 4                         | 128 | 36.9 | 218 | 32.7 | 579 | 50.0 | 712   | 30.9 | 2,061 | 63.9 |
| 27 | > 4                         | 224 | 63.1 | 466 | 67.3 | 620 | 50.0 | 1,444 | 69.1 | 1,220 | 36.1 |
| 28 |                             |     |      |     |      |     |      |       |      |       |      |
| 29 |                             |     |      |     |      |     |      |       |      |       |      |
| 30 | Province                    |     |      |     |      |     |      |       |      |       |      |
| 31 | Bali                        | 38  | 16.5 | 70  | 9.7  | 116 | 10.8 | 227   | 14.4 | 369   | 14.0 |
| 32 | Central Java                | 58  | 29.6 | 88  | 20.3 | 162 | 22.6 | 289   | 23.2 | 457   | 24.2 |
| 33 | West Java                   | 38  | 17.2 | 100 | 23.2 | 195 | 26.4 | 308   | 20.3 | 433   | 21.0 |
| 34 | Other                       | 141 | 36.7 | 313 | 46.8 | 540 | 40.2 | 980   | 42.1 | 1531  | 40.8 |
| 35 |                             |     |      |     |      |     |      |       |      |       |      |
| 36 |                             |     |      |     |      |     |      |       |      |       |      |
| 37 | Food                        |     |      |     |      |     |      |       |      |       |      |
| 38 | Expenditures <sup>4</sup>   |     |      |     |      |     |      |       |      |       |      |
| 39 | <i>Rice</i>                 |     |      |     |      |     |      |       |      |       |      |
| 40 | Lowest                      | 83  | 43.0 | 365 | 53.5 | 627 | 52.0 | 1,135 | 53.5 | 1,709 | 54.5 |
| 41 | Highest                     | 103 | 57.0 | 314 | 46.5 | 564 | 48.0 | 1,016 | 46.5 | 1,561 | 45.5 |
| 42 |                             |     |      |     |      |     |      |       |      |       |      |
| 43 | <i>Cooking oil</i>          |     |      |     |      |     |      |       |      |       |      |
| 44 | Lowest                      | 89  | 34.5 | 290 | 43.6 | 525 | 45.2 | 936   | 42.8 | 1,811 | 56.6 |
| 45 | Highest                     | 203 | 65.5 | 388 | 56.4 | 665 | 54.8 | 1,215 | 57.2 | 1,459 | 43.4 |

<sup>1</sup> Overweight is defined as body mass index  $\geq 25\text{kg/m}^2$ . Percentages are weighted to be representative of the population of Indonesia in the given survey year

<sup>2</sup> Skilled manual labor combines the following employment sectors: mining, manufacturing, electric, gas, water maintenance, and construction

<sup>3</sup> Skilled labor combines the following employment sectors: retail and service, transportation

<sup>4</sup> Represents the household level expenditure on each item as a percentage of the households' total expenditures on food

1  
2  
3 Nearly equal proportions of boys and girls aged 0-19 years were overweight and a majority  
4 had a parent with at least primary school education (Supplemental Tables 2-4). Across all groups,  
5 the proportion of overweight children who had an overweight mother increased between 1993 and  
6 2014. The distribution of urban/rural residence among overweight children also changed over time,  
7 with more overweight young- and school-aged children residing in urban areas by 2014 (~60%)  
8 compared to 1993. The distribution of wealth among overweight children and adolescents also  
9 varied over time, but like adults, by 2014, there was an even distribution of overweight children in  
10 each wealth quintile (~20%).  
11  
12  
13  
14  
15  
16  
17  
18  
19  
20  
21

### 22 **Distribution of Consumption of Ultra-Processed Food and Physical Activity**

23  
24  
25 In 2014, approximately 60% of adults reported consuming instant noodles during the last  
26 week (Table 3). Likewise, about 65% of adults reported consuming fried snacks, for 4.0 days on  
27 average. Smaller proportions of adults regularly consumed fast food or soda.  
28  
29  
30  
31

32 Trends were similar among children. Nearly 60% of children aged 6-59 months consumed  
33 instant noodles during the last week, as did three-quarters of children aged 6-12 years (77.5%) and  
34 13-18 years (78.3%). Half (50.4%) of children aged 6-59 months and about two-thirds of children  
35 aged 6-18 years regularly consumed fried snacks. Similar proportions of children regularly  
36 consumed fast food (~15%), irrespective of age. All age groups of children consumed soda an  
37 average of 2 days per week.  
38  
39  
40  
41  
42  
43  
44  
45

46 Higher proportions of men were engaged in vigorous physical activity (38.0%) compared  
47 to women (10.7%). More than half adults reported being engaged in moderate physical activity  
48 and approximately 70% reported walking during the last week. Physical activity levels decreased,  
49 among both women and men, between 2007 and 2014 (2007 data not shown).  
50  
51  
52  
53  
54  
55  
56  
57  
58  
59  
60



**Table 3. Distribution and Frequency of Consumption of Ultra-Processed Foods and Physical Activity in Indonesia, 2014**

|                                      | Women  |           | Men    |           | Children Aged 6 mo-5 years |           | Children Aged 6-12 years |           | Children Aged 13-18 years |           |
|--------------------------------------|--------|-----------|--------|-----------|----------------------------|-----------|--------------------------|-----------|---------------------------|-----------|
|                                      | n      | % or Mean | n      | % or Mean | n                          | % or Mean | n                        | % or Mean | n                         | % or Mean |
| <b>Instant Noodles</b>               |        |           |        |           |                            |           |                          |           |                           |           |
| Last Week <sup>1</sup>               | 9,818  | 60.0      | 8,703  | 63.7      | 2,674                      | 56.8      | 5,467                    | 77.5      | 2,084                     | 78.3      |
| Mean Days <sup>2</sup>               |        | 2.5       |        | 2.6       |                            | 2.7       |                          | 3.0       |                           | 2.9       |
| <b>Fast Food</b>                     |        |           |        |           |                            |           |                          |           |                           |           |
| Last Week <sup>1</sup>               | 1,718  | 9.0       | 1,291  | 8.8       | 685                        | 14.5      | 1,357                    | 18.8      | 450                       | 16.3      |
| Mean Days <sup>2</sup>               |        | 1.8       |        | 1.7       |                            | 2.4       |                          | 2.5       |                           | 2.1       |
| <b>Soda</b>                          |        |           |        |           |                            |           |                          |           |                           |           |
| Last Week <sup>1</sup>               | 1,956  | 10.7      | 3,281  | 22.6      | 278                        | 5.0       | 1,075                    | 14.5      | 647                       | 23.0      |
| Mean Days <sup>2</sup>               |        | 1.8       |        | 2.0       |                            | 2.0       |                          | 2.1       |                           | 2.0       |
| <b>Fried Snacks</b>                  |        |           |        |           |                            |           |                          |           |                           |           |
| Last Week <sup>1</sup>               | 9,706  | 65.4      | 8,668  | 68.8      | 2,282                      | 50.4      | 4,530                    | 66.4      | 1,841                     | 72.0      |
| Mean Days <sup>2</sup>               |        | 4.0       |        | 3.9       |                            | 3.3       |                          | 3.9       |                           | 4.1       |
| <b>Vigorous Activity<sup>3</sup></b> |        |           |        |           |                            |           |                          |           |                           |           |
| Last Week                            | 15,191 | 10.7      | 13,148 | 38.0      |                            | na        |                          | na        |                           | na        |
| Mean Days                            |        | 3.9       |        | 4.2       |                            | na        |                          | na        |                           | na        |
| <b>Moderate Activity<sup>3</sup></b> |        |           |        |           |                            |           |                          |           |                           |           |
| Last Week                            | 15,191 | 58.1      | 13,148 | 54.2      |                            | na        |                          | na        |                           | na        |
| Mean Days                            |        | 4.8       |        | 4.4       |                            | na        |                          | na        |                           | na        |
| <b>Walking<sup>3</sup></b>           |        |           |        |           |                            |           |                          |           |                           |           |
| Last Week                            | 15,191 | 68.8      | 13,148 | 72.4      |                            | na        |                          | na        |                           | na        |
| Mean Days                            |        | 5.1       |        | 5.1       |                            | na        |                          | na        |                           | na        |

na = not applicable

<sup>1</sup> Percent distribution, weighted to be representative of the population of Indonesia in the given survey year. n represents the number of respondents that consumed a particular item during the last week.<sup>2</sup> The average number of days an individual consumed each food is queried only if the respondent reported that they consumed the item in the last week.<sup>3</sup> Defined using the International Physical Activity Questionnaire. Respondents are asked about each type of physical activity (i.e. vigorous, moderate, walking) separately and therefore, should be interpreted as mutually exclusive categories. The percent distribution is weighted to be representative of the population of Indonesia in the given survey year.

## Regression-based Analyses Among Adults

Figure 2 summarizes all associations between hypothesized risk factors and overweight in multivariable models (see Supplemental Tables 5-6 for univariable models). Among women, older age, higher education, living in an urban area, and higher wealth were associated with higher odds of overweight in 2014 (Table 4). Married women, versus never married, also had higher odds of overweight (odds ratio [OR]=2.39; 95% confidence interval [CI]: 1.88, 2.98). Working in a skilled labor position, versus not working, was associated with 17% higher odds of overweight among women (OR=1.17; 95% CI: 1.04, 1.33) whereas working in agriculture-based labor, a physically demanding occupation, was associated with an approximately 30% lower odds of overweight (OR=0.66; 95% CI: 0.56, 0.78). Household expenditures on cooking oil (OR=1.24; 95% CI: 1.12, 1.38) and individual's consumption of fried snacks (versus no consumption) (OR=1.12; 95% CI: 1.00, 1.25) were associated with higher odds of overweight.

**Table 4. Multivariable Logistic Regression Investigating the Association Between Selected Characteristics and Overweight Among Adults Aged 19 + in Indonesia in 2014**

|                       | Women <sup>1,2</sup> |                     | Men <sup>1,2</sup> |                     |
|-----------------------|----------------------|---------------------|--------------------|---------------------|
|                       | n                    | Odds Ratio (95% CI) | n                  | Odds Ratio (95% CI) |
|                       | N=9,073              |                     | N=5,775            |                     |
| <b>Age</b>            |                      |                     |                    |                     |
| 19-29 y               | 2,403                | Reference           | 1,441              | Reference           |
| 30-39 y               | 2,630                | 2.03 (1.75, 2.34) * | 1,807              | 1.79 (1.40, 2.30) * |
| 40-49 y               | 1,943                | 2.83 (2.41, 3.31) * | 1,320              | 2.37 (1.83, 3.08) * |
| 50-59 y               | 1,357                | 2.36 (1.97, 2.83) * | 719                | 2.37 (1.76, 3.20) * |
| 60+ y                 | 740                  | 1.68 (1.34, 2.12) * | 488                | 0.92 (0.62, 1.36)   |
| <b>Education</b>      |                      |                     |                    |                     |
| No Education          | 511                  | Reference           | 106                | Reference           |
| Primary               | 3,562                | 2.04 (1.59, 2.60) * | 2,029              | 1.76 (0.87, 3.57)   |
| Junior or Senior      | 3,809                | 1.89 (1.46, 2.46) * | 2,854              | 2.47 (1.21, 5.04) * |
| University            | 1,191                | 1.67 (1.24, 2.26) * | 786                | 3.66 (1.75, 7.65) * |
| <b>Smoking Status</b> |                      |                     |                    |                     |

|    |                                  |                             |       |                     |       |                     |
|----|----------------------------------|-----------------------------|-------|---------------------|-------|---------------------|
| 1  |                                  |                             |       |                     |       |                     |
| 2  |                                  |                             |       |                     |       |                     |
| 3  |                                  | Non-Smoker                  | 8,881 | Reference           | 1,849 | Reference           |
| 4  |                                  | Smoker                      | 192   | 0.78 (0.55, 1.10)   | 3,926 | 0.51 (0.43, 0.60) * |
| 5  |                                  |                             |       |                     |       |                     |
| 6  |                                  |                             |       |                     |       |                     |
| 7  | Marital Status                   |                             |       |                     |       |                     |
| 8  |                                  | Never Married               | 683   | Reference           | 774   | Reference           |
| 9  |                                  | Married                     | 7,909 | 2.39 (1.88, 2.98) * | 4,931 | 2.04 (1.48, 2.82) * |
| 10 |                                  | Other                       | 481   | 1.54 (1.10, 2.15) * | 70    | 1.59 (0.77, 3.27)   |
| 11 |                                  |                             |       |                     |       |                     |
| 12 |                                  |                             |       |                     |       |                     |
| 13 | Employment                       |                             |       |                     |       |                     |
| 14 |                                  | Not Working                 | 3,227 | Reference           | 371   | Reference           |
| 15 |                                  | Agriculture                 | 1,585 | 0.66 (0.56, 0.78) * | 1,483 | 0.50 (0.35, 0.73) * |
| 16 |                                  | Skilled Manual <sup>3</sup> | 794   | 0.92 (0.76, 1.12)   | 1,290 | 0.73 (0.51, 1.06)   |
| 17 |                                  | Skilled <sup>4</sup>        | 3,467 | 1.17 (1.04, 1.33) * | 2,631 | 1.15 (0.82, 1.61)   |
| 18 |                                  |                             |       |                     |       |                     |
| 19 |                                  |                             |       |                     |       |                     |
| 20 |                                  |                             |       |                     |       |                     |
| 21 | Physical Activity <sup>5</sup> : |                             |       |                     |       |                     |
| 22 |                                  | No Vigorous Activity        |       | na                  | 3,624 | Reference           |
| 23 |                                  | Vigorous Activity           |       | na                  | 2,151 | 0.93 (0.79, 1.10)   |
| 24 |                                  |                             |       |                     |       |                     |
| 25 |                                  |                             |       |                     |       |                     |
| 26 |                                  | No Moderate Activity        | 3,663 | Reference           |       | na                  |
| 27 |                                  | Moderate Activity           | 5,410 | 1.10 (0.99, 1.22)   |       | na                  |
| 28 |                                  |                             |       |                     |       |                     |
| 29 |                                  |                             |       |                     |       |                     |
| 30 | Consumed Last Week:              |                             |       |                     |       |                     |
| 31 |                                  | <i>Instant Noodles</i>      |       |                     |       |                     |
| 32 |                                  | No                          | 3,218 | Reference           |       | na                  |
| 33 |                                  | Yes                         | 5,855 | 1.10 (0.98, 1.25)   |       | na                  |
| 34 |                                  |                             |       |                     |       |                     |
| 35 |                                  |                             |       |                     |       |                     |
| 36 |                                  | <i>Fast Food</i>            |       |                     |       |                     |
| 37 |                                  | No                          | 8,116 | Reference           | 5,172 | Reference           |
| 38 |                                  | Yes                         | 957   | 1.02 (0.85, 1.27)   | 603   | 1.34 (1.06, 1.69) * |
| 39 |                                  |                             |       |                     |       |                     |
| 40 |                                  |                             |       |                     |       |                     |
| 41 |                                  | <i>Soda</i>                 |       |                     |       |                     |
| 42 |                                  | No                          |       | na                  | 4,196 | Reference           |
| 43 |                                  | Yes                         |       | na                  | 1,579 | 1.10 (0.92, 1.30)   |
| 44 |                                  |                             |       |                     |       |                     |
| 45 |                                  |                             |       |                     |       |                     |
| 46 |                                  | <i>Fried Snacks</i>         |       |                     |       |                     |
| 47 |                                  | No                          | 3,236 | Reference           | 1,782 | Reference           |
| 48 |                                  | Yes                         | 5,837 | 1.12 (1.00, 1.25) * | 3,993 | 1.06 (0.89, 1.25)   |
| 49 |                                  |                             |       |                     |       |                     |
| 50 |                                  |                             |       |                     |       |                     |
| 51 |                                  |                             |       |                     |       |                     |
| 52 | Mean Number of Days              |                             |       |                     |       |                     |
| 53 | Consumed in the Last             |                             |       |                     |       |                     |
| 54 | Week <sup>6</sup> :              |                             |       |                     |       |                     |
| 55 |                                  | Instant Noodles             |       | na                  | 5,775 | 0.99 (0.95, 1.04)   |
| 56 |                                  |                             |       |                     |       |                     |
| 57 |                                  |                             |       |                     |       |                     |
| 58 |                                  |                             |       |                     |       |                     |
| 59 |                                  |                             |       |                     |       |                     |
| 60 |                                  |                             |       |                     |       |                     |

Household Level  
Food Expenditures<sup>7</sup>

|           |                    |       |                     |       |                     |
|-----------|--------------------|-------|---------------------|-------|---------------------|
|           | <i>Rice</i>        |       |                     |       |                     |
|           | Lowest             | 4,408 | Reference           |       | na                  |
|           | Highest            | 4,665 | 1.02 (0.91, 1.13)   |       | na                  |
|           | <i>Cooking oil</i> |       |                     |       |                     |
|           | Lowest             | 5,256 | Reference           | 3,378 | Reference           |
|           | Highest            | 3,817 | 1.24 (1.12, 1.38) * | 2,397 | 1.19 (1.02, 1.39) * |
| Residence |                    |       |                     |       |                     |
|           | Rural              | 3,803 | Reference           | 2,401 | Reference           |
|           | Urban              | 5,270 | 1.21 (1.08, 1.35) * | 3,374 | 1.26 (1.06, 1.50) * |
| Wealth    |                    |       |                     |       |                     |
|           | Lowest             | 2,289 | Reference           | 1,354 | Reference           |
|           | Second             | 2,017 | 1.23 (1.06, 1.44) * | 1,271 | 0.95 (0.76, 1.20)   |
|           | Middle             | 1,455 | 1.23 (1.03, 1.45) * | 964   | 0.99 (0.77, 1.26)   |
|           | Fourth             | 1,696 | 1.06 (0.90, 1.25)   | 1,127 | 1.06 (0.84, 1.34)   |
|           | Highest            | 1,616 | 1.12 (0.95, 1.32)   | 1,059 | 1.17 (0.92, 1.48)   |

CI = confidence interval, na = not applicable, not included in multivariable model

<sup>1</sup> Overweight is defined as body mass index  $\geq 25$  kg/m<sup>2</sup>

<sup>2</sup> Odds ratios and confidence intervals are estimated using logistic regression and are weighted to account for the survey design. Pregnant women are excluded

<sup>3</sup> Skilled manual labor combines the following employment sectors: mining, manufacturing, electric, gas, water maintenance, and construction

<sup>4</sup> Skilled labor combines the following employment sectors: retail and service, transportation

<sup>5</sup> Defined using the International Physical Activity Questionnaire

<sup>6</sup> Modelled as a continuous variable, the average number of days consumed is queried if the respondent reported that they consumed item during the last week

<sup>7</sup> Indicates the household level expenditure on each item as a percentage of the households' total expenditures on food

\*  $p < 0.05$

Similarly, among men, older age, higher educational attainment, and living in an urban area were associated with higher overweight (Table 4). Wealth was not associated with overweight among men. Married men, versus never married, had two-fold higher odds of overweight (OR=2.04; 95% CI: 1.48, 2.82). Consuming fast food, compared to not consuming fast food, was associated with 34% higher odds of overweight among men (OR=1.34; 95% CI: 1.06, 1.69). Current smokers (versus non-smokers) (OR=0.51; 95% CI: 0.43, 0.60) and men who had an agriculture-based occupation (versus not working) (OR=0.50; 95% CI: 0.35, 0.73) had 50% lower

1  
2  
3 odds of overweight. Results were similar when investigating associations among adults in  
4  
5 longitudinal models (Supplemental Tables 7 and 8).  
6  
7

### 8 **Regression-based Analyses Among Children**

9

10  
11 In multivariable models for children aged 6 months to 5 years, consuming fast food  
12  
13 (OR=1.48; 95% CI: 1.00, 2.19), urban residence (OR=1.64; 95% CI: 1.14, 2.35) and higher  
14  
15 household wealth (OR=1.70; 95% CI: 1.03, 2.81) were associated with higher odds of overweight  
16  
17 (Table 5). Among children aged 6-12 years, every 1-year increase in age was associated with 6%  
18  
19 higher odds of overweight (OR=1.06; 95% CI: 1.01, 1.11). Having an overweight mother  
20  
21 (OR=1.92; 95% CI: 1.59, 2.32), living in an urban area (OR=1.55; 95% CI: 1.26, 1.91), and higher  
22  
23 household wealth were associated with higher odds of overweight. On the contrary, parental  
24  
25 employment in agriculture-based (OR=0.61; 95% CI: 0.44, 0.85) or skilled manual labor  
26  
27 (OR=0.50; 95% CI: 0.33, 0.74) and living in households with > 4 people (OR=0.82; 95% CI: 0.68,  
28  
29 0.99) were associated with lower odds of overweight.  
30  
31  
32  
33

34  
35 Having an overweight mother was associated with 92% higher odds of being overweight  
36  
37 among adolescents (OR=1.92; 95% CI: 1.53, 2.43). Living in an urban area also predicted higher  
38  
39 odds of overweight among this age group (OR=1.74; 95% CI: 1.33, 2.27). On the contrary, having  
40  
41 a parent employed in agriculture-based labor (OR=0.64; 95% CI: 0.43, 0.96), skilled manual labor  
42  
43 (OR=0.52; 95% CI: 0.33, 0.83) or skilled labor (OR=0.70; 95% CI: 0.53, 0.91), compared to not  
44  
45 working, was associated with lower odds of overweight among adolescents.  
46  
47  
48  
49  
50  
51  
52  
53  
54  
55  
56  
57  
58  
59  
60

**Table 5. Multivariable Logistic Regression Models Investigating the Association Between Selected Characteristics and Overweight Among Children in Indonesia, 2014**

|                                  | 6 months - 5 years <sup>1</sup> |                     | 6 – 12 years <sup>2</sup> |                     | 13 – 18 years <sup>2</sup> |                     |
|----------------------------------|---------------------------------|---------------------|---------------------------|---------------------|----------------------------|---------------------|
|                                  | n                               | Odds Ratio (95% CI) | n                         | Odds Ratio (95% CI) | n                          | Odds Ratio (95% CI) |
|                                  | N=3,424                         |                     | N=4,791                   |                     | N=3,186                    |                     |
| Mean Age <sup>3</sup>            | 3,424                           | 1.01 (0.88, 1.16)   | 4,791                     | 1.06 (1.01, 1.11) * | 3,186                      | 0.84 (0.79, 0.91) * |
| Gender                           |                                 |                     |                           |                     |                            |                     |
| Boys                             | 1,767                           | Reference           | 2,455                     | Reference           | 1,648                      | Reference           |
| Girls                            | 1,657                           | 0.78 (0.58, 1.08)   | 2,336                     | 0.96 (0.79, 1.15)   | 1,538                      | 1.06 (0.85, 1.33)   |
| Parental Education <sup>4</sup>  |                                 |                     |                           |                     |                            |                     |
| No Education                     | 188                             | Reference           | 313                       | Reference           | 264                        | Reference           |
| Primary                          | 1,234                           | 0.97 (0.40, 2.36)   | 1,980                     | 0.73 (0.48, 1.11)   | 1,505                      | 1.01 (0.62, 1.66)   |
| Junior or Senior                 | 1,568                           | 1.12 (0.47, 2.65)   | 1,997                     | 0.84 (0.55, 1.27)   | 1,173                      | 1.18 (0.71, 1.94)   |
| University                       | 434                             | 1.12 (0.44, 2.87)   | 501                       | 1.34 (0.84, 2.14)   | 244                        | 1.38 (0.76, 2.49)   |
| Parental Employment <sup>4</sup> |                                 |                     |                           |                     |                            |                     |
| Not Working                      | 1,780                           | Reference           | 1,989                     | Reference           | 1,239                      | Reference           |
| Agriculture                      | 433                             | 0.61 (0.31, 1.21)   | 821                       | 0.61 (0.44, 0.85) * | 581                        | 0.64 (0.43, 0.96) * |
| Skilled Manual <sup>5</sup>      | 208                             | 0.98 (0.52, 1.84)   | 371                       | 0.50 (0.33, 0.74) * | 264                        | 0.52 (0.33, 0.83) * |
| Skilled <sup>6</sup>             | 1,003                           | 1.15 (0.82, 1.63)   | 1,610                     | 0.91 (0.73, 1.13)   | 1,102                      | 0.70 (0.53, 0.91) * |
| Maternal Overweight              |                                 |                     |                           |                     |                            |                     |
| Not Overweight                   | 2,238                           | Reference           | 2,894                     | Reference           | 1,834                      | Reference           |
| Overweight                       | 1,186                           | 1.20 (0.89, 1.62)   | 1,897                     | 1.92 (1.59, 2.32) * | 1,352                      | 1.92 (1.53, 2.43) * |
| Consumed Last Week:              |                                 |                     |                           |                     |                            |                     |
| <i>Instant Noodles</i>           |                                 |                     |                           |                     |                            |                     |
| No                               | 1,525                           | Reference           |                           | na                  |                            | na                  |
| Yes                              | 1,899                           | 0.79 (0.57, 1.11)   |                           | na                  |                            | na                  |
| <i>Fast Food</i>                 |                                 |                     |                           |                     |                            |                     |

|                    |         |       |                        |       |                     |       |                     |
|--------------------|---------|-------|------------------------|-------|---------------------|-------|---------------------|
|                    | No      | 2,952 | Reference              | 3,909 | Reference           |       | na                  |
|                    | Yes     | 472   | 1.48 (1.00, 2.19) *    | 882   | 1.16 (0.93, 1.45)   |       | na                  |
| <b>Residence</b>   |         |       |                        |       |                     |       |                     |
|                    | Rural   | 1,478 | Reference              | 2,053 | Reference           | 1,323 | Reference           |
|                    | Urban   | 1,946 | 1.64 (1.14, 2.35) *    | 2,738 | 1.55 (1.26, 1.91) * | 1,863 | 1.74 (1.33, 2.27) * |
| <b>Wealth</b>      |         |       |                        |       |                     |       |                     |
|                    | Lowest  | 830   | Reference <sup>7</sup> | 1,109 | Reference           | 799   | Reference           |
|                    | Second  | 807   | 1.54 (0.94, 2.53)      | 1,056 | 1.43 (1.06, 1.92) * | 735   | 1.11 (0.80, 1.54)   |
|                    | Middle  | 565   | 1.43 (0.83, 2.48)      | 812   | 1.73 (1.26, 2.36) * | 513   | 0.95 (0.66, 1.37)   |
|                    | Fourth  | 671   | 1.70 (1.03, 2.81) *    | 931   | 1.45 (1.07, 1.95) * | 574   | 0.95 (0.65, 1.37)   |
|                    | Highest | 551   | 1.61 (0.96, 2.70)      | 883   | 1.55 (1.14, 2.11) * | 565   | 0.94 (0.66, 1.33)   |
| <b>Family Size</b> |         |       |                        |       |                     |       |                     |
|                    | ≤ 4     |       | na                     | 2,105 | Reference           | 1,225 | Reference           |
|                    | > 4     |       | na                     | 2,686 | 0.82 (0.68, 0.99) * | 1,961 | 0.87 (0.69, 1.10)   |

CI = confidence interval, na= not applicable, not included in multivariable model  
<sup>1</sup> Overweight is defined as weight-for-height z-score > 2 using the MGRS Standard, estimated using logistic regression models and are weighted to account for the survey design  
<sup>2</sup> Overweight is defined body mass index z-score > 1 using the WHO reference, estimated using logistic regression models and weighted to account for the survey design  
<sup>3</sup> Modelled as a continuous variable  
<sup>4</sup> Parental characteristics are of the mother, when available. When not available the characteristic is based on the father’s data.  
<sup>5</sup> Skilled manual labor combines the following employment sectors: mining, manufacturing, electric, gas, water maintenance, and construction  
<sup>6</sup> Skilled labor combines the following employment sectors: retail and service, transportation  
<sup>7</sup> Wealth was not significant in the univariable model but is included in the multivariable model due to previously-established associations  
\* p < 0.05

## DISCUSSION

Several aspects of our results paint an alarming picture of obesity-related health in Indonesia. Increases in overweight prevalence were observed among all groups. Between 1993 and 2014 the prevalence of overweight increased by 100% and 88%, among women and men, respectively. Similarly, among school-aged children and adolescents, the prevalence of overweight increased by more than 100% between 1993 and 2014. Over the past two decades, more rural than urban residents became overweight, and in 2014, the proportions of overweight adults were evenly distributed among across wealth quintiles, suggesting that overweight is now prevalent among the poor. Moreover, consuming instant noodles (high in sodium) and fried snacks (high in fat) are now regularly consumed among adults and children in Indonesia and consuming fast food and fried snacks were associated with higher odds of overweight. At the same time, the rate of overweight has remained stagnant among young children, between 2007 and 2014, and being employed in a physically demanding job (i.e. agriculture-based labor) remains protective against overweight.

More than half of Indonesians now live in an urban area and living in an urban area was associated with higher odds of overweight. Several other analyses have also reported higher rates of overweight in urban areas in lower-income countries [25,26] and in Indonesia specifically [27–30]. Urbanization alters supply-side factors, such as the food system and the rapid spread of supermarkets in low- and middle-income countries (LMIC), which makes low-cost, convenient, and highly processed foods more available and accessible [31–33]. Simulations suggest that a shift in the urban population from 25% to 75% is associated with a 4-percentage point increase of total energy from fat and an additional 12- percentage points of energy from sugar [34]. In addition, urbanization leads to lower physical activity, in part because the jobs that become available tend to be more sedentary.



1  
2  
3 Paralleling increased country-level economic development, the within country  
4 socioeconomic context has changed in Indonesia. Poverty has dramatically decreased over the last  
5 20-years, while educational attainment has increased; in 2016, approximately 34% of Indonesians  
6 had at least completed upper secondary school, compared to only 26% in 2006 [14,35]. Relatedly,  
7 we found that higher education was associated with higher odds of overweight among both men  
8 and women. Higher wealth was also associated with 25% higher odds of being overweight among  
9 women and a 70%, 55%, and 74% higher odds of overweight among young children, school-age  
10 children, and adolescents, respectively. Higher education [7] and higher wealth or income [7,27]  
11 have been shown to be associated with higher overweight among adults and children in prior  
12 studies conducted in Indonesia. But importantly, descriptive statistics in our study also show a  
13 growing prevalence of overweight among lower-wealth groups. For example, the percent of  
14 overweight women in the poorest and second wealth quintiles grew by 60% and 120%,  
15 respectively. This is consistent with prior studies, which have documented an increasing burden  
16 of overweight among women with lower education and in poorer households in Indonesia and  
17 other LMIC [36–39].  
18  
19  
20  
21  
22  
23  
24  
25  
26  
27  
28  
29  
30  
31  
32  
33  
34  
35  
36  
37

38 For both adults and children, consuming ultra-processed foods (instant noodles, fried  
39 snacks, fast food) was associated with higher odds of overweight. Prior literature on the  
40 consumption of ultra-processed foods in Indonesia is limited. But these results are generally  
41 consistent with prior findings that reported that the percent of total energy coming from fat has  
42 increased in this context [27,40] and one recent survey conducted in Asia that suggested that the  
43 consumption of palm oil, “Western” foods, and processed foods are widespread [6].  
44  
45  
46  
47  
48  
49  
50  
51

52 As Indonesia has continued to economically develop, more women are entering the labor  
53 force and less of the population is employed in agriculture-based labor. Currently, about 50% of  
54  
55  
56  
57  
58  
59  
60

1  
2  
3 Indonesia's labor force is employed in the service sector, compared to 30% in agriculture and 20%  
4 in industry [14]. Similar to prior literature, employment was associated with overweight in this  
5 sample [41,42]. We found that skilled occupations were associated with higher odds of overweight  
6 whereas agriculture-based employment was associated with lower odds of overweight. This is  
7 likely related to occupation-related physical activity; Monda and colleagues provide empirical  
8 evidence of a reduction in the intensity of occupational activity with economic development in  
9 China [43]. In fact, reduced physical activity likely represents the most important cause of rapid  
10 overweight increases between 1990 and 2010 in most LMIC (with dietary factors playing a more  
11 major role from 2010-present) [44].  
12  
13  
14  
15  
16  
17  
18  
19  
20  
21  
22  
23

24 Similar to our results, Rachmi and colleagues report that overweight prevalence is higher  
25 among younger-aged boys versus girls in Indonesia [7]. Finally, having an overweight mother was  
26 strongly associated with higher odds of overweight among school-age children and adolescents.  
27 Although the importance of intergenerational nutrition is often a concern for undernutrition, it  
28 warrants consideration for overnutrition as well. Pre-pregnancy maternal overweight puts infants  
29 at increased risk of being born large-for-gestational-age and subsequently overweight during  
30 childhood [45–50]. A child born to a mother who is overweight is twice as likely to be overweight  
31 as a child, compared to a child whose mother was normal weight [48,49].  
32  
33  
34  
35  
36  
37  
38  
39  
40  
41  
42

43 A recent report by the Economist Intelligence Unit reviewed obesity policies and  
44 interventions that are being/have been tested in Southeast Asian countries [6]. Interventions that  
45 targeted food intake showed the most promise to reduce obesity. Traditionally, nutrition programs  
46 have focused on women and young children. But our findings call for urgent action to mitigate  
47 overweight among all age-groups in Indonesia and highlights that need for prevention strategies  
48 that also target men and boys, as well as individuals in rural areas. A multipronged strategy would  
49  
50  
51  
52  
53  
54  
55  
56  
57  
58  
59  
60

1  
2  
3 include approaches that aim to enhance the food environment, improve the food system, and  
4 provide effective social behavior change communication [51,52]. Fiscal measures, such as food-  
5 and beverage-related taxes, to reduce the consumption of unhealthy items and subsidies for fruits  
6 and vegetables production and consumption, may be effective in improving the overall food  
7 environment and are a feasible approach for targeting most segments of the population in Indonesia  
8 [52–55]. Regulatory measures to control warning labelling systems and marketing of unhealthy  
9 foods and beverages may also improve the obesogenic environment [52,56,57]. It is also important  
10 to address overweight early, as child and adolescent obesity tracks into adulthood [58,59];  
11 interventions aimed at improving nutrition literacy and eating and physical activity behaviors  
12 through school-based nutrition education and effective social and behavior change communication  
13 to mobilize the support of the entire community also warrant consideration [52,60,61]. Using  
14 technology-based platforms, such as social media, to deliver obesity-prevention messages may be  
15 a promising strategy in Indonesia given that population is quite young. A multi-pronged strategy  
16 that utilizes a number of delivery platforms (e.g. policy, healthcare system, schools) is needed in  
17 order to mitigate the obesity epidemic among all age groups in Indonesia.  
18  
19  
20  
21  
22  
23  
24  
25  
26  
27  
28  
29  
30  
31  
32  
33  
34  
35  
36  
37

38 These findings and recommendations should be interpreted while keeping in mind the  
39 limitations of our study. First, we largely employ cross-sectional data, therefore, we cannot infer  
40 any causal associations and there may be unmeasured confounding. Data on the consumption of a  
41 select number of ultra-processed foods was only collected in 2014, which limits our ability to make  
42 inferences about the association between ultra-processed foods and overweight over time. Physical  
43 activity levels were based on respondent recall. These limitations in the IFLS and the potential for  
44 unmeasured confounding with a cross-sectional study design may have attenuated some  
45 associations related to food consumption and physical activity. Finally, these findings may not be  
46  
47  
48  
49  
50  
51  
52  
53  
54  
55  
56  
57  
58  
59  
60

1  
2  
3 generalizable beyond Indonesia. Despite some limitations, we are able to compare overweight  
4 trends over time among all age groups, explore the consumption of ultra-processed foods and  
5 physical activity, and investigate hypothesized risk factors for overweight using regression-based  
6 methods, using a recent dataset that is nationally representative of Indonesia.  
7  
8  
9  
10  
11

12  
13 Indonesia is undergoing nutrition transition, as evidenced by the increasing prevalence of  
14 overweight, the ubiquitous consumption of ultra-processed foods, and decreasing levels of  
15 physical activity. These data suggest urgent program and policy action is needed to reduce and  
16 prevent overweight among all age groups. In addition, these data highlight the need for prevention  
17 strategies that also target males, as well as the increasing prevalence of overweight among rural  
18 and poorer populations. Multi-sectoral, multi-stakeholder actions and solutions are needed to  
19 improve the food environment in Indonesia.  
20  
21  
22  
23  
24  
25  
26  
27  
28  
29  
30  
31  
32  
33  
34  
35  
36  
37  
38  
39  
40  
41  
42  
43  
44  
45  
46  
47  
48  
49  
50  
51  
52  
53  
54  
55  
56  
57  
58  
59  
60

## Acknowledgments

The authors wish to thank Paul Pronyk for his insightful comments on the manuscript.

## Funding

This research received no specific grant from any funding agency in the public, commercial or not-for-profit sectors.

## Conflict of Interest Statement

The authors do not have any conflicts of interest to declare.

## Author Contributions

VMO, MM, and JHR conceptualized the research question and jointly developed the analytic plan. MM acquired the publicly available data. VMO took the primary role in data analysis, interpretation of findings, and drafting of the manuscript. MM and JHR also provided critical input on the interpretation of the findings and provided input on all manuscript drafts. VMO, MM, and JHR approved the final version of the manuscript.

## Data Statement

Data are publicly available at <https://www.rand.org/well-being/social-and-behavioral-policy/data/FLS/IFLS.html>

## REFERENCES

- 1 Popkin BM, Adair LS, Ng SW. Global nutrition transition and the pandemic of obesity in developing countries. *Nutr Rev* 2012;**70**:3–21.
- 2 Swinburn BA, Sacks G, Hall KD, *et al*. The global obesity pandemic: shaped by global drivers and local environments. *Lancet* 2011;**378**:804–14.
- 3 Natawidjaja R, Reardon T, Shetty S, *et al*. Horticultural producers and supermarket development in Indonesia. *UNPAD/MSU/World Bank World Bank Rep* 2007;**38543**.
- 4 Drewnowski A. The cost of US foods as related to their nutritive value. *Am J Clin Nutr* 2010;**92**:1181–8.
- 5 Dangour AD, Hawkesworth S, Shankar B, *et al*. Can nutrition be promoted through agriculture-led food price policies? A systematic review. *BMJ Open* 2013;**3**:e002937.
- 6 Economist Intelligence Unit. Tackling obesity in ASEAN Prevalence, Impact, and Guidance on Interventions. 2017.  
<https://foodindustry.asia/documentdownload.axd?documentresourceid=30157>
- 7 Rachmi CN, Li M, Baur LA. Overweight and obesity in Indonesia: prevalence and risk factors—a literature review. *Public Health* 2017;**147**:20–9.
- 8 Prihantini S, Jahari AB. Risk factors of obesity in school children age 6–18 years in DKI Jakarta. *Penelit Dizi Dan Makanan* 2007;**30**:32–40.
- 9 Schröders J, Wall S, Hakimi M, *et al*. How is Indonesia coping with its epidemic of chronic noncommunicable diseases? A systematic review with meta-analysis. *PLoS One* 2017;**12**:e0179186.
- 10 Shrimpton R, Rokx C. The double burden of malnutrition in Indonesia. Jakarta, Indonesia: 2013. <https://openknowledge.worldbank.org/handle/10986/17007>
- 11 The National Institute of Health Research and Development. National report on basic health research, RISKESDAS 2013. Jakarta, Indonesia: 2014.
- 12 Widjojo S, Sunawang, Ljungqvist B, *et al*. UNICEF Health Sector Review Indonesia. Jakarta: 2014.
- 13 UNICEF. Adolescents and Their Families: Perspectives and Experiences on Nutrition and Physical Activities. Indonesia:
- 14 Central Intelligence Agency. The World Factbook: Indonesia. 2019.<https://www.cia.gov/library/publications/the-world-factbook/geos/id.html>
- 15 The World Bank. The World Bank in Indonesia. 2019.<https://www.worldbank.org/en/country/indonesia/overview#3>
- 16 UNFPA. Indonesia Population Projection 2015-2045. 2018.
- 17 Strauss J, Witoelar F, Sikoki B. The fifth wave of the Indonesia family life survey: overview and field report. *RAND St Monica, CA, USA* 2016.
- 18 RAND Cooperation. IFLS Data and Documentation. 2019.<https://www.rand.org/well-being/social-and-behavioral-policy/data/FLS/IFLS/download.html> (accessed 31 Jul 2019).
- 19 Strauss J, Witoelar F, Sikoki B, *et al*. *User's Guide for the Indonesia Family Life Survey*,

- 1  
2  
3 Wave 5. RAND Santa Monica 2016.
- 4  
5 20 de Onis M, Onyango AW, Borghi E, *et al.* Development of a WHO growth reference for  
6 school-aged children and adolescents. *Bull World Health Organ* 2007;**85**:660–7.
- 7  
8 21 Group WHOMGRS. WHO Child Growth Standards based on length/height, weight and  
9 age. *Acta Paediatr (Oslo, Norw 1992)Supplement* 2006;**450**:76–85.
- 10  
11 22 Kumanyika S, Jeffery RW, Morabia A, *et al.* Obesity prevention: the case for action. *Int J*  
12 *Obes* 2002;**26**:425.
- 13  
14 23 Vandenberg P, Goossens J, Clemens M. Foresight-Tackling Obesities: Future Choices –  
15 Building the Obesity System Map. London, UK: 2007.  
16 [https://assets.publishing.service.gov.uk/government/uploads/system/uploads/attachment\\_d](https://assets.publishing.service.gov.uk/government/uploads/system/uploads/attachment_data/file/295154/07-1179-obesity-building-system-map.pdf)  
17 [ata/file/295154/07-1179-obesity-building-system-map.pdf](https://assets.publishing.service.gov.uk/government/uploads/system/uploads/attachment_data/file/295154/07-1179-obesity-building-system-map.pdf)
- 18  
19 24 Zou G. A modified poisson regression approach to prospective studies with binary data.  
20 *Am J Epidemiol* 2004;**159**:702–6.
- 21  
22 25 Mendez MA, Monteiro CA, Popkin BM. Overweight exceeds underweight among women  
23 in most developing countries. *Am J Clin Nutr* 2005;**81**:714–  
24 21. <http://ajcn.nutrition.org/content/81/3/714.full.pdf>
- 25  
26 26 Jaacks LM, Slining MM, Popkin BM. Recent underweight and overweight trends by rural-  
27 urban residence among women in low- and middle-income countries. *J Nutr*  
28 2015;**145**:352–7. doi:10.3945/jn.114.203562 [doi]
- 29  
30 27 Roemling C, Qaim M. Obesity trends and determinants in Indonesia. *Appetite*  
31 2012;**58**:1005–13.
- 32  
33 28 Susilowati D. The relationship between overweight and socio demographic status among  
34 adolescent girls in Indonesia. *Bul Penelit Sist Kesehat* 2011;**14**.
- 35  
36 29 Sari K, Mansyur M. Female, live in urban, and the existence of a caregiver increased risk  
37 overnutrition in elderly: an Indonesian national study 2010. *Heal Sci J Indones* 2012;**3**:9–  
38 14.
- 39  
40 30 Diana R, Yuliana I, Yasmin G, *et al.* Risk Factors of Overweight among Indonesian  
41 Women. *J Gizi dan Pangan* 2013;**8**:1–8.
- 42  
43 31 Kennedy G, Nantel G, Shetty P. Globalization of food systems in developing countries: a  
44 synthesis of country case studies. *Glob food Syst Dev Ctries impact food Secur Nutr*  
45 2004;**83**.
- 46  
47 32 Monteiro CA, Levy RB, Claro RM, *et al.* Increasing consumption of ultra-processed foods  
48 and likely impact on human health: evidence from Brazil. *Public Health Nutr* 2011;**14**:5–  
49 13.
- 50  
51 33 Popkin BM, Conde W, Hou N, *et al.* Is there a lag globally in overweight trends for  
52 children compared with adults? *Obesity* 2006;**14**:1846–53.
- 53  
54 34 Popkin BM. Urbanization, lifestyle changes and the nutrition transition. *World Dev*  
55 1999;**27**:1905–16.
- 56  
57 35 UNESCO Institute for Statistics; Educational attainment, at least completed upper  
58 secondary, population 25+. 2016.



- 1  
2  
3 36 Jones-Smith JC, Gordon-Larsen P, Siddiqi A, *et al*. Cross-national comparisons of time  
4 trends in overweight inequality by socioeconomic status among women using repeated  
5 cross-sectional surveys from 37 developing countries, 1989-2007. *Am J Epidemiol*  
6 2011;**173**:667–75. doi:10.1093/aje/kwq428; 10.1093/aje/kwq428  
7
- 8 37 Jones-Smith JC, Gordon-Larsen P, Siddiqi A, *et al*. Is the burden of overweight shifting to  
9 the poor across the globe? Time trends among women in 39 low-and middle-  
10 income countries (1991–2008). *Int J Obes* 2012;**36**:1114–  
11 20. <http://www.nature.com/ijo/journal/v36/n8/pdf/ijo2011179a.pdf>  
12
- 13 38 Masood M, Reidpath DD. Effect of national wealth on BMI: An analysis of 206,266  
14 individuals in 70 low-, middle-and high-income countries. *PLoS One* 2017;**12**:e0178928.  
15
- 16 39 Monteiro CA, Moura EC, Conde WL, *et al*. Socioeconomic status and obesity in adult  
17 populations of developing countries: a review. *Bull World Health Organ* 2004;**82**:940–6.  
18
- 19 40 Lipoeto NI, Wattanapenpaiboon N, Malik A, *et al*. Nutrition transition in west Sumatra,  
20 Indonesia. *Asia Pac J Clin Nutr* 2004;**13**.  
21
- 22 41 Oddo VM, Bleich SN, Pollack KM, *et al*. The weight of work: the association between  
23 maternal employment and overweight in low-and middle-income countries. *Int J Behav*  
24 *Nutr Phys Act* 2017;**14**:66.  
25
- 26 42 Oddo VM, Mueller NT, Pollack KM, *et al*. Maternal Employment and Childhood  
27 Overweight in Low- and Middle-Income Countries. *Public Health Nutr*  
28
- 29 43 Monda KL, Gordon-Larsen P, Stevens J, *et al*. China's transition: the effect of rapid  
30 urbanization on adult occupational physical activity. *Soc Sci Med* 2007;**64**:858–70.  
31
- 32 44 Church TS, Thomas DM, Tudor-Locke C, *et al*. Trends over 5 decades in US occupation-  
33 related physical activity and their associations with obesity. *PLoS One* 2011;**6**:e19657.  
34
- 35 45 Deierlein AL, Siega-Riz AM, Adair LS, *et al*. Effects of pre-pregnancy body mass index  
36 and gestational weight gain on infant anthropometric outcomes. *J Pediatr* 2011;**158**:221–  
37 6.  
38
- 39 46 Skilton MR, Siitonen N, Wurtz P, *et al*. High birth weight is associated with obesity and  
40 increased carotid wall thickness in young adults: the cardiovascular risk in young Finns  
41 study. *Arterioscler Thromb Vasc Biol* 2014;**34**:1064–8.  
42 doi:10.1161/ATVBAHA.113.302934 [doi]
- 43 47 Yu Z, Han S, Zhu J, *et al*. Pre-pregnancy body mass index in relation to infant birth  
44 weight and offspring overweight/obesity: a systematic review and meta-analysis. *PLoS*  
45 *One* 2013;**8**:e61627. doi:10.1371/journal.pone.0061627; 10.1371/journal.pone.0061627  
46
- 47 48 Whitaker KL, Jarvis MJ, Beeken RJ, *et al*. Comparing maternal and paternal  
48 intergenerational transmission of obesity risk in a large population-based sample-. *Am J*  
49 *Clin Nutr* 2010;**91**:1560–7.  
50
- 51 49 Murrin CM, Kelly GE, Tremblay RE, *et al*. Body mass index and height over three  
52 generations: evidence from the Lifeways cross-generational cohort study. *BMC Public*  
53 *Health* 2012;**12**:81.  
54
- 55 50 Ehrenberg HM, Mercer BM, Catalano PM. The influence of obesity and diabetes on the  
56 prevalence of macrosomia. *Am J Obstet Gynecol* 2004;**191**:964–8.  
57  
58  
59  
60



- 1  
2  
3 51 Hawkes C, Jewell J, Allen K. A food policy package for healthy diets and the prevention  
4 of obesity and diet-related non-communicable diseases: the NOURISHING framework.  
5 *Obes Rev* 2013;**14**:159–68.  
6  
7 52 World Cancer Research Fund International. NOURISHING framework.  
8 2018.<http://www.wcrf.org/int/policy/nourishing-framework> (accessed 26 Mar 2019).  
9  
10 53 Grogger J. Soda taxes and the prices of sodas and other drinks: Evidence from Mexico.  
11 *Am J Agric Econ* 2017;**99**:481–98. doi:10.1093/ajae/aax024  
12  
13 54 Colchero MA, Rivera-Dommarco J, Popkin BM, *et al.* In Mexico, Evidence Of Sustained  
14 Consumer Response Two Years After Implementing A Sugar-Sweetened Beverage Tax.  
15 *Health Aff (Millwood)* 2017;**36**:564–71. doi:10.1377/hlthaff.2016.1231  
16  
17 55 An R. Effectiveness of subsidies in promoting healthy food purchases and consumption: a  
18 review of field experiments. *Public Health Nutr* 2013;**16**:1215.  
19  
20 56 Lee Y, Yoon J, Chung S-J, *et al.* Effect of TV food advertising restriction on food  
21 environment for children in South Korea. *Health Promot Int* 2013;**32**:25–34.  
22  
23 57 Mhurchu C, Eyles H, Choi Y-H. Effects of a voluntary front-of-pack nutrition labelling  
24 system on packaged food reformulation: The health star rating system in New Zealand.  
25 *Nutrients* 2017;**9**:918.  
26  
27 58 Simmonds M, Llewellyn A, Owen CG, *et al.* Predicting adult obesity from childhood  
28 obesity: a systematic review and meta-analysis. *Obes Rev* 2016;**17**:95–107.  
29  
30 59 Whitaker RC, Wright JA, Pepe MS, *et al.* Predicting obesity in young adulthood from  
31 childhood and parental obesity. *N Engl J Med* 1997;**337**:869–73.  
32  
33 60 Waters E, de Silva-Sanigorski A, Burford BJ, *et al.* Interventions for preventing obesity in  
34 children. *Cochrane Libr* 2011.  
35  
36 61 Salam RA, Hooda M, Das JK, *et al.* Interventions to improve adolescent nutrition: A  
37 systematic review and meta-analysis. *J Adolesc Heal* 2016;**59**:S29–39.  
38  
39  
40  
41  
42  
43  
44  
45  
46  
47  
48  
49  
50  
51  
52  
53  
54  
55  
56  
57  
58  
59  
60

1  
2  
3 **Figure 1. Percent Distribution of Overweight in Indonesia, 1993-2014**<sup>1-4</sup>  
4

5 [see attached Figure 1]  
6

7 <sup>1</sup> Percentages are weighted to be representative of the population of Indonesia in the given survey year

8 <sup>2</sup> Adults: excludes women who are currently pregnant. Overweight/obesity defined as body mass index  $\geq 25$  kg/m<sup>2</sup>

9 <sup>3</sup> Children Aged 0-5 years: overweight/obesity defined as weight-for-height z-score  $> 2$  using the MGRS Standard

10 <sup>4</sup> Children Aged 6-18 years: overweight/obesity as body mass index-for-age z-score  $> 1$  using the WHO Reference  
11  
12  
13  
14  
15  
16  
17  
18  
19  
20  
21  
22  
23  
24  
25  
26  
27  
28  
29  
30  
31  
32  
33  
34  
35  
36  
37  
38  
39  
40  
41  
42  
43  
44  
45  
46  
47  
48  
49  
50  
51  
52  
53  
54  
55  
56  
57  
58  
59  
60

1  
2  
3 **Figure 2. Summary of Associations between Selected Characteristics and Overweight in**  
4 **Multivariable Models**  
5

6  
7 [See Attached Figure 2]  
8

9 -- not applicable; ns = not significant

10 **Associated with higher odds of overweight in multivariable models**

11 **Associated with lower odds of overweight in multivariable models**

12 **Direction of association with overweight is mixed in multivariable models**

13 <sup>1</sup> Parental characteristic for child models  
14  
15  
16  
17  
18  
19  
20  
21  
22  
23  
24  
25  
26  
27  
28  
29  
30  
31  
32  
33  
34  
35  
36  
37  
38  
39  
40  
41  
42  
43  
44  
45  
46  
47  
48  
49  
50  
51  
52  
53  
54  
55  
56  
57  
58  
59  
60

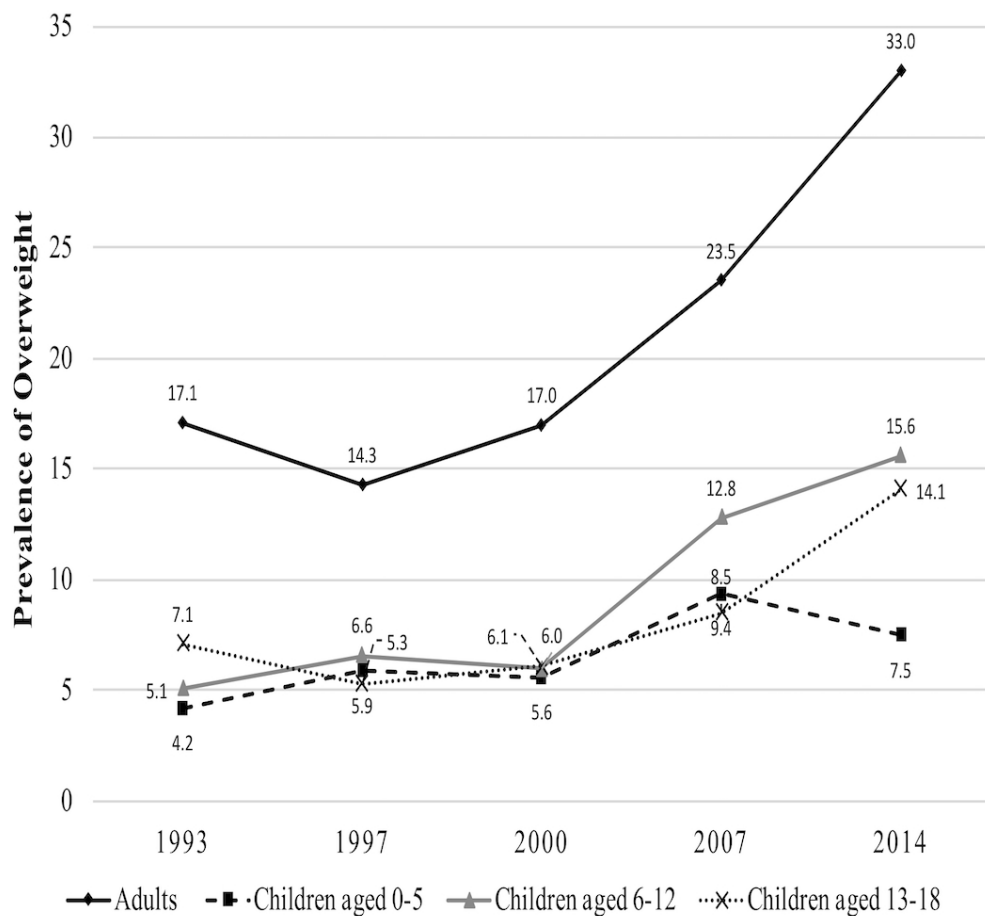

Figure 1

90x90mm (300 x 300 DPI)

|                                     | Adults |     | Children |        |         |
|-------------------------------------|--------|-----|----------|--------|---------|
|                                     | Women  | Men | 0-5 y    | 6-12 y | 13-18 y |
| Age                                 |        |     | ns       |        |         |
| Gender                              | --     | --  | ns       | ns     | ns      |
| Ever Breastfed                      | --     | --  | ns       | --     | --      |
| Exclusively Breastfed               | --     | --  | ns       | --     | --      |
| Complementary Food                  | --     | --  | ns       | --     | --      |
| Education <sup>1</sup>              |        |     | ns       | ns     | ns      |
| Smoking Status                      | ns     |     | --       | --     | --      |
| Marital Status                      |        |     | --       | --     | --      |
| Employment <sup>1</sup>             |        |     | ns       |        |         |
| Maternal Overweight/Obesity         | --     | --  | ns       |        |         |
| Vigorous Physical Activity          | ns     | ns  | --       | --     | --      |
| Moderate Physical Activity          | ns     | ns  | --       | --     | --      |
| Walking                             | ns     | ns  | --       | --     | --      |
| Consumed Instant Noodles            | ns     | ns  | ns       | ns     | ns      |
| Consumed Fast Food                  | ns     |     |          | ns     | ns      |
| Consumed Soda                       | ns     | ns  | ns       | ns     | ns      |
| Consumed Fried Snacks               |        | ns  | ns       | ns     | ns      |
| Household Expenditures: Rice        | ns     | ns  | ns       | ns     | ns      |
| Household Expenditures: Cooking Oil |        |     | ns       | ns     | ns      |
| Household Urban/Rural Residence     |        |     |          |        |         |
| Household Wealth                    |        | ns  |          |        | ns      |
| Household Size                      | ns     | ns  | ns       |        | ns      |

Figure 2

90x90mm (300 x 300 DPI)

## Online Supplemental Material

**Supplemental Table 1. Obesity Related Factors Available in the Indonesian Family Life Survey**

|                                     |                                       | 1993 | 1997 | 2000 | 2007 | 2014 |
|-------------------------------------|---------------------------------------|------|------|------|------|------|
| <b>Household-Level Factors</b>      |                                       |      |      |      |      |      |
| Urbanization                        | Urban/Rural                           | *    | *    | *    | *    | *    |
| Wealth                              | Asset type                            | *    | *    | *    | *    | *    |
| Expenditures                        | Soda, snacks, cooking oil, rice       | *    | *    | *    | *    | *    |
| Family Size                         | Number in household                   | *    | *    | *    | *    | *    |
| <b>Individual-Level Factors</b>     |                                       |      |      |      |      |      |
| <b>Adults</b>                       |                                       |      |      |      |      |      |
| Demographics                        | Age, Gender, Marital Status           | *    | *    | *    | *    | *    |
| Education                           | Highest education attained            | *    | *    | *    | *    | *    |
| Employment                          | Worked in last week, occupation       | *    | *    | *    | *    | *    |
| Parity                              | Among ever married women              | *    | *    | *    | *    | *    |
| Smoking                             | Ever smoker, currently smoking        | *    | *    | *    | *    | *    |
| Physical Activity                   | Vigorous, moderate, walking, last 7d  | ---  | ---  | ---  | *    | *    |
| <b>Children</b>                     |                                       |      |      |      |      |      |
| Demographics                        | Age, gender                           | *    | *    | *    | *    | *    |
| Parental Characteristics            | Education, employment, overweight     | *    | *    | *    | *    | *    |
| Early Life Nutrition <sup>1</sup>   | Ever breastfed, exclusively breastfed | *    | *    | *    | *    | *    |
| <b>Diet</b>                         |                                       |      |      |      |      |      |
| Instant noodles                     | Days per week, mean number days       | ---  | ---  | ---  | ---  | *    |
| Soft drink (e.g. coca cola, sprite) | Days per week, mean number days       | ---  | ---  | ---  | ---  | *    |
| Fried snacks (e.g. tempe, tahu)     | Days per week, mean number days       | ---  | ---  | ---  | ---  | *    |
| Fast Food                           | Days per week, mean number days       | ---  | ---  | ---  | ---  | *    |
| Staple Foods (e.g. rice, eggs)      | Days per week, mean number days       | ---  | ---  | *    | *    | *    |
| <b>Anthropometry and Health</b>     |                                       |      |      |      |      |      |
| Height                              |                                       | *    | *    | *    | *    | *    |
| Weight                              |                                       | *    | *    | *    | *    | *    |
| Waist Circumference                 |                                       | ---  | ---  | *    | *    | *    |
| Blood Pressure                      |                                       | ---  | *    | *    | *    | *    |
| Pulse                               |                                       | ---  | *    | *    | *    | *    |
| Medication Use                      |                                       | ---  | ---  | *    | *    | *    |
| Dried Blood Spots <sup>1</sup>      |                                       | ---  | ---  | ---  | *    | *    |

\* data are available in given year --- data not available

<sup>1</sup> Queried among ever married women for children they had in the last 5 years

## Online Supplemental Material

**Supplemental Table 2. Percent Distribution of Selected Characteristics Among Overweight Children Aged 0-5 in Indonesia Over Time**

|                                          | 1993 <sup>1</sup>           |    | 1997 <sup>1</sup> |     | 2000 <sup>1</sup> |     | 2007 <sup>1</sup> |     | 2014 <sup>1</sup> |     |      |
|------------------------------------------|-----------------------------|----|-------------------|-----|-------------------|-----|-------------------|-----|-------------------|-----|------|
|                                          | n                           | %  | n                 | %   | n                 | %   | n                 | %   | n                 | %   |      |
| <b>Age (years)</b>                       |                             |    |                   |     |                   |     |                   |     |                   |     |      |
|                                          | 0-2                         | 58 | 76.6              | 88  | 81.5              | 145 | 72.2              | 301 | 72.7              | 230 | 62.4 |
|                                          | 3-5                         | 20 | 23.4              | 21  | 18.5              | 47  | 27.8              | 107 | 27.3              | 133 | 37.6 |
| <b>Gender</b>                            |                             |    |                   |     |                   |     |                   |     |                   |     |      |
|                                          | Boys                        | 40 | 52.7              | 56  | 47.9              | 112 | 58.2              | 236 | 55.1              | 210 | 57.7 |
|                                          | Girls                       | 38 | 47.3              | 109 | 52.1              | 80  | 41.8              | 172 | 44.9              | 153 | 42.3 |
| <b>Ever Breastfed<sup>2</sup></b>        |                             |    |                   |     |                   |     |                   |     |                   |     |      |
|                                          | No                          | 4  | 5.4               | 0   | 0                 | 3   | 2.4               | 11  | 3.2               | 10  | 2.7  |
|                                          | Yes                         | 46 | 94.6              | 25  | 100.0             | 132 | 97.6              | 350 | 96.8              | 318 | 97.3 |
| <b>Exclusively Breastfed<sup>2</sup></b> |                             |    |                   |     |                   |     |                   |     |                   |     |      |
|                                          | No                          | 49 | 95.4              | 23  | 88.9              | 131 | 96.1              | 332 | 92.8              | 274 | 84.4 |
|                                          | Yes                         | 1  | 4.6               | 2   | 11.1              | 4   | 3.9               | 29  | 7.2               | 54  | 19.6 |
| <b>Complementary Foods<sup>2</sup></b>   |                             |    |                   |     |                   |     |                   |     |                   |     |      |
|                                          | < 6 mo or ≥ 8 mo            | 41 | 94.8              | 21  | 100               | 110 | 96.2              | 290 | 91.2              | 247 | 55.8 |
|                                          | ≥ 6 mo to < 8 mo            | 1  | 5.2               | 0   | 0                 | 4   | 3.8               | 31  | 8.8               | 51  | 44.2 |
| <b>Parental Education<sup>3</sup></b>    |                             |    |                   |     |                   |     |                   |     |                   |     |      |
|                                          | No Education                | 9  | 17.0              | 19  | 18.0              | 20  | 11.6              | 24  | 8.1               | 11  | 3.9  |
|                                          | Primary                     | 31 | 61.1              | 53  | 57.4              | 98  | 51.4              | 118 | 35.1              | 96  | 33.0 |
|                                          | Junior or Senior            | 12 | 17.7              | 18  | 17.5              | 56  | 29.3              | 169 | 45.3              | 156 | 47.3 |
|                                          | University                  | 3  | 4.2               | 7   | 7.0               | 14  | 7.7               | 44  | 11.5              | 56  | 15.8 |
| <b>Parental Employment<sup>3</sup></b>   |                             |    |                   |     |                   |     |                   |     |                   |     |      |
|                                          | Not working                 | 30 | 58.1              | 77  | 71.0              | 118 | 61.2              | 230 | 57.8              | 185 | 53.7 |
|                                          | Agriculture                 | 5  | 9.3               | 5   | 3.8               | 18  | 11.3              | 35  | 9.6               | 22  | 5.6  |
|                                          | Skilled Manual <sup>4</sup> | 9  | 16.1              | 9   | 8.6               | 13  | 7.3               | 36  | 9.0               | 24  | 7.3  |
|                                          | Skilled <sup>5</sup>        | 11 | 16.5              | 17  | 16.5              | 39  | 20.2              | 103 | 23.5              | 130 | 33.4 |
| <b>Maternal Overweight</b>               |                             |    |                   |     |                   |     |                   |     |                   |     |      |
|                                          | Not Overweight              | 33 | 79.5              | 88  | 85.1              | 158 | 88.3              | 288 | 73.3              | 198 | 58.7 |
|                                          | Overweight                  | 10 | 20.5              | 15  | 14.9              | 23  | 11.7              | 104 | 26.7              | 149 | 41.3 |
| <b>Residence</b>                         |                             |    |                   |     |                   |     |                   |     |                   |     |      |
|                                          | Rural                       | 46 | 70.6              | 56  | 55.6              | 91  | 49.0              | 151 | 44.2              | 123 | 39.2 |
|                                          | Urban                       | 32 | 29.4              | 53  | 44.4              | 101 | 51.0              | 257 | 55.8              | 240 | 60.8 |
| <b>Wealth</b>                            |                             |    |                   |     |                   |     |                   |     |                   |     |      |

## Online Supplemental Material

|         |    |      |    |      |    |      |     |      |    |      |
|---------|----|------|----|------|----|------|-----|------|----|------|
| Lowest  | 26 | 39.8 | 20 | 20.7 | 39 | 22.1 | 114 | 31.6 | 56 | 18.8 |
| Second  | 7  | 7.2  | 15 | 14.8 | 37 | 21.0 | 80  | 22.4 | 69 | 25.0 |
| Middle  | 12 | 17.0 | 27 | 25.2 | 34 | 19.9 | 60  | 19.3 | 43 | 16.3 |
| Fourth  | 19 | 28.3 | 15 | 14.6 | 31 | 19.2 | 53  | 15.2 | 65 | 22.5 |
| Highest | 13 | 7.7  | 24 | 24.7 | 29 | 17.7 | 46  | 11.4 | 52 | 17.4 |

## Family Size

|     |    |      |    |      |     |      |     |      |     |      |
|-----|----|------|----|------|-----|------|-----|------|-----|------|
| ≤ 4 | 26 | 22.1 | 30 | 26.9 | 86  | 46.9 | 167 | 41.1 | 195 | 54.2 |
| > 4 | 52 | 77.9 | 79 | 73.1 | 106 | 53.1 | 241 | 58.9 | 168 | 45.8 |

<sup>1</sup>Overweight is defined as weight-for-height z-score > 2 using the MGRS Standard. Percentages are weighted to be representative of the population of Indonesia in the given survey year

<sup>2</sup>Breastfeeding data are reported by the mother retrospectively. Exclusively breastfed indicates whether the child was only given breastmilk (no water or complementary foods) when the child was aged 0-6 months. Complementary foods indicate appropriate timing of complementary foods, that is, the introduction of complementary foods when the child was 6-8 months old.

<sup>3</sup>Parental characteristics are of the mother, when available. When not available the characteristic is based on the father's data

<sup>4</sup>Skilled manual labor combines the following employment sectors: mining, manufacturing, electric, gas, water maintenance, and construction

<sup>5</sup>Skilled labor combines the following employment sectors: retail and service, transportation



## Online Supplemental Material

**Supplemental Table 3. Percent Distribution of Selected Characteristics Among Overweight Children Aged 6-12 in Indonesia Over Time**

|                                  | 1993 <sup>1</sup> |      | 1997 <sup>1</sup> |      | 2000 <sup>1</sup> |      | 2007 <sup>1</sup> |      | 2014 <sup>1</sup> |      |  |
|----------------------------------|-------------------|------|-------------------|------|-------------------|------|-------------------|------|-------------------|------|--|
|                                  | n                 | %    | n                 | %    | n                 | %    | n                 | %    | n                 | %    |  |
| Age (years)                      |                   |      |                   |      |                   |      |                   |      |                   |      |  |
| 6-9                              | 113               | 55.6 | 183               | 58.6 | 206               | 59.0 | 495               | 59.0 | 760               | 53.3 |  |
| 10-12                            | 48                | 44.4 | 90                | 41.4 | 91                | 41.0 | 200               | 41.0 | 332               | 46.7 |  |
| Gender                           |                   |      |                   |      |                   |      |                   |      |                   |      |  |
| Boys                             | 77                | 44.0 | 144               | 51.4 | 166               | 54.5 | 387               | 55.1 | 601               | 53.4 |  |
| Girls                            | 84                | 56.0 | 132               | 48.6 | 133               | 45.5 | 310               | 44.9 | 492               | 46.6 |  |
| Parental Education <sup>2</sup>  |                   |      |                   |      |                   |      |                   |      |                   |      |  |
| No Education                     | 10                | 7.5  | 126               | 27.3 | 42                | 15.2 | 51                | 9.1  | 46                | 5.4  |  |
| Primary                          | 69                | 70.5 | 49                | 51.9 | 135               | 44.4 | 230               | 40.4 | 282               | 32.5 |  |
| Junior or Senior                 | 23                | 13.0 | 15                | 14.9 | 91                | 30.5 | 237               | 37.3 | 441               | 45.4 |  |
| University                       | 14                | 8.9  | 254               | 5.8  | 25                | 9.9  | 85                | 13.3 | 182               | 16.8 |  |
| Parental Employment <sup>2</sup> |                   |      |                   |      |                   |      |                   |      |                   |      |  |
| Not Working                      | 53                | 46.3 | 162               | 61.0 | 132               | 44.0 | 317               | 45.3 | 448               | 42.9 |  |
| Agriculture                      | 6                 | 6.9  | 32                | 11.3 | 42                | 14.1 | 76                | 12.9 | 91                | 9.7  |  |
| Skilled Manual <sup>3</sup>      | 19                | 17.8 | 11                | 4.4  | 33                | 13.2 | 54                | 8.1  | 79                | 7.9  |  |
| Skilled <sup>4</sup>             | 36                | 29.0 | 63                | 23.3 | 87                | 28.7 | 232               | 33.7 | 442               | 39.5 |  |
| Maternal Overweight              |                   |      |                   |      |                   |      |                   |      |                   |      |  |
| Not Overweight                   | 60                | 68.9 | 184               | 72.3 | 186               | 66.2 | 356               | 56.2 | 454               | 44.9 |  |
| Overweight                       | 38                | 31.1 | 73                | 27.7 | 96                | 33.8 | 289               | 43.8 | 541               | 55.1 |  |
| Residence                        |                   |      |                   |      |                   |      |                   |      |                   |      |  |
| Rural                            | 61                | 56.7 | 129               | 53.8 | 112               | 39.9 | 255               | 45.3 | 298               | 37.0 |  |
| Urban                            | 100               | 43.3 | 146               | 46.2 | 187               | 60.1 | 442               | 54.7 | 795               | 63.0 |  |
| Wealth                           |                   |      |                   |      |                   |      |                   |      |                   |      |  |
| Lowest                           | 30                | 22.2 | 50                | 22.3 | 36                | 13.1 | 87                | 15.4 | 129               | 16.3 |  |
| Second                           | 17                | 16.1 | 37                | 14.4 | 44                | 18.1 | 142               | 26.0 | 160               | 21.4 |  |
| Middle                           | 36                | 20.5 | 44                | 19.6 | 45                | 20.4 | 75                | 13.0 | 141               | 19.3 |  |
| Fourth                           | 29                | 18.9 | 45                | 20.3 | 48                | 20.6 | 139               | 25.1 | 173               | 21.1 |  |
| Highest                          | 47                | 22.3 | 62                | 23.4 | 66                | 27.9 | 120               | 20.6 | 181               | 21.8 |  |
| Family Size                      |                   |      |                   |      |                   |      |                   |      |                   |      |  |
| ≤ 4                              | 49                | 35.4 | 65                | 22.5 | 114               | 39.4 | 222               | 32.3 | 621               | 58.6 |  |
| > 4                              | 112               | 64.6 | 211               | 77.5 | 185               | 60.6 | 475               | 67.7 | 472               | 41.4 |  |

<sup>1</sup>Overweight is defined as body mass index-for-age z-score > 1 using the WHO Reference. Percentages are weighted to be representative of the population of Indonesia in the given survey year

<sup>2</sup>Parental characteristics are of the mother, when available. When not available the characteristic is based on the father's data

## Online Supplemental Material

<sup>3</sup> Skilled manual labor combines the following employment sectors: mining, manufacturing, electric, gas, water maintenance, and construction

<sup>4</sup> Skilled labor combines the following employment sectors: retail and service, transportation

For peer review only

**Supplemental Table 4. Percent Distribution of Selected Characteristics Among Overweight Children Aged 13-18 in Indonesia Over Time**

|                                        | 1993 <sup>1</sup> |      | 1997 <sup>1</sup> |      | 2000 <sup>1</sup> |      | 2007 <sup>1</sup> |      | 2014 <sup>1</sup> |      |  |
|----------------------------------------|-------------------|------|-------------------|------|-------------------|------|-------------------|------|-------------------|------|--|
|                                        | n                 | %    | n                 | %    | n                 | %    | n                 | %    | n                 | %    |  |
| <b>Age (years)</b>                     |                   |      |                   |      |                   |      |                   |      |                   |      |  |
| 13-15                                  | 45                | 67.9 | 84                | 53.9 | 98                | 47.6 | 301               | 48.5 | 280               | 54.1 |  |
| 16-18                                  | 9                 | 32.0 | 74                | 46.1 | 131               | 52.4 | 107               | 51.5 | 262               | 45.9 |  |
| <b>Gender</b>                          |                   |      |                   |      |                   |      |                   |      |                   |      |  |
| Boys                                   | 40                | 52.2 | 90                | 44.9 | 95                | 35.8 | 150               | 40.7 | 333               | 48.9 |  |
| Girls                                  | 43                | 47.8 | 121               | 55.1 | 179               | 64.2 | 217               | 59.3 | 374               | 51.1 |  |
| <b>Parental Education<sup>2</sup></b>  |                   |      |                   |      |                   |      |                   |      |                   |      |  |
| No Education                           | 7                 | 10.8 | 48                | 27.4 | 45                | 19.5 | 36                | 10.9 | 36                | 6.5  |  |
| Primary                                | 46                | 72.0 | 96                | 53.7 | 136               | 56.3 | 164               | 54.6 | 240               | 42.2 |  |
| Junior or Senior                       | 9                 | 8.0  | 34                | 15.4 | 47                | 17.0 | 93                | 27.2 | 265               | 41.0 |  |
| University                             | 3                 | 9.2  | 7                 | 3.5  | 14                | 7.2  | 23                | 7.3  | 72                | 10.3 |  |
| <b>Parental Employment<sup>2</sup></b> |                   |      |                   |      |                   |      |                   |      |                   |      |  |
| Not Working                            | 38                | 64.9 | 112               | 56.8 | 91                | 36.8 | 132               | 39.9 | 277               | 45.3 |  |
| Agriculture                            | 2                 | 4.3  | 14                | 8.1  | 39                | 16.6 | 43                | 13.7 | 64                | 11.0 |  |
| Skilled Manual <sup>3</sup>            | 4                 | 3.2  | 11                | 4.9  | 15                | 7.4  | 30                | 9.2  | 46                | 8.3  |  |
| Skilled <sup>4</sup>                   | 21                | 27.6 | 59                | 30.2 | 97                | 39.2 | 129               | 37.2 | 260               | 35.3 |  |
| <b>Maternal Overweight</b>             |                   |      |                   |      |                   |      |                   |      |                   |      |  |
| Not Overweight                         | 28                | 57.2 | 110               | 54.3 | 132               | 56.3 | 173               | 54.2 | 256               | 40.7 |  |
| Overweight                             | 29                | 42.8 | 90                | 45.7 | 108               | 43.7 | 155               | 45.8 | 371               | 59.3 |  |
| <b>Household Level</b>                 |                   |      |                   |      |                   |      |                   |      |                   |      |  |
| <b>Residence</b>                       |                   |      |                   |      |                   |      |                   |      |                   |      |  |
| Rural                                  | 20                | 39.7 | 69                | 37.9 | 114               | 45.5 | 134               | 42.4 | 204               | 39.5 |  |
| Urban                                  | 63                | 60.3 | 142               | 62.1 | 160               | 54.5 | 233               | 57.6 | 503               | 60.5 |  |
| <b>Wealth</b>                          |                   |      |                   |      |                   |      |                   |      |                   |      |  |
| Lowest                                 | 11                | 14.6 | 26                | 15.2 | 38                | 16.5 | 46                | 16.6 | 118               | 23.8 |  |
| Second                                 | 5                 | 3.3  | 28                | 13.5 | 40                | 20.0 | 71                | 25.6 | 119               | 24.0 |  |
| Middle                                 | 18                | 30.2 | 44                | 27.8 | 47                | 21.2 | 33                | 12.5 | 80                | 16.1 |  |
| Fourth                                 | 19                | 21.3 | 29                | 17.4 | 37                | 15.3 | 65                | 23.4 | 86                | 18.2 |  |
| Highest                                | 29                | 30.6 | 47                | 26.1 | 58                | 26.9 | 63                | 21.8 | 103               | 17.9 |  |
| <b>Family Size</b>                     |                   |      |                   |      |                   |      |                   |      |                   |      |  |
| ≤ 4                                    | 21                | 29.0 | 31                | 17.0 | 92                | 36.1 | 74                | 21.9 | 353               | 54.6 |  |
| > 4                                    | 62                | 71.0 | 180               | 83.0 | 182               | 63.9 | 293               | 78.1 | 354               | 45.4 |  |

<sup>1</sup> Overweight is defined as body mass index-for-age z-score > 1 using the WHO Reference. Percentages are weighted to be representative of the population of Indonesia in the given survey year

<sup>2</sup> Parental characteristics are of the mother, when available. When not available the characteristic is based on the father's data

## Online Supplemental Material

7

<sup>3</sup> Skilled manual labor combines the following employment sectors: mining, manufacturing, electric, gas, water maintenance, and construction

<sup>4</sup> Skilled labor combines the following employment sectors: retail and service, transportation

For peer review only

**Supplemental Table 5. Univariable Logistic Regression Models Investigating the Associations Between Selected Characteristics and Overweight Among Adults in Indonesia in 2014**

|                                                        | Women <sup>1,2</sup> |                     | Men <sup>1,2</sup> |                      |
|--------------------------------------------------------|----------------------|---------------------|--------------------|----------------------|
|                                                        | n                    | Odds Ratio (95% CI) | n                  | Odds Ratio (95% CI)  |
| <b>Age (years)</b>                                     |                      |                     |                    |                      |
| 19-29                                                  | 4,350                | Reference           | 3,680              | Reference            |
| 30-39                                                  | 4,217                | 2.23 (2.01, 2.46) * | 3,981              | 1.95 (1.72, 2.22) *  |
| 40-49                                                  | 2,807                | 2.93 (2.62, 3.27) * | 2,766              | 2.41 (2.10, 2.76) *  |
| 50-59                                                  | 2,053                | 2.26 (2.00, 2.56) * | 1,748              | 2.09 (1.79, 2.44) *  |
| 60+                                                    | 1,858                | 1.04 (0.91, 1.19)   | 1,612              | 0.95 (0.79, 1.13) *  |
| <b>Education</b>                                       |                      |                     |                    |                      |
| No Education                                           | 1,033                | Reference           | 381                | Reference            |
| Primary                                                | 4,912                | 2.89 (2.42, 3.45) * | 4,192              | 2.44 (1.61, 3.70) *  |
| Junior or Senior                                       | 4,894                | 2.98 (2.49, 3.55) * | 4,901              | 4.30 (2.85, 6.49) *  |
| University                                             | 1,581                | 2.90 (2.36, 3.55) * | 1,487              | 8.48 (5.55, 12.94) * |
| <b>Smoking Status</b>                                  |                      |                     |                    |                      |
| Non-Smoker                                             | 14,772               | Reference           | 4,552              | Reference            |
| Smoker                                                 | 434                  | 0.57 (0.45, 0.72) * | 9,165              | 0.47 (0.43, 0.52) *  |
| <b>Marital Status</b>                                  |                      |                     |                    |                      |
| Never Married                                          | 1,560                | Reference           | 2,436              | Reference            |
| Married                                                | 11,549               | 3.37 (2.88, 3.95) * | 10,780             | 2.04 (1.78, 2.34) *  |
| Other                                                  | 2,172                | 1.78 (1.48, 2.14) * | 565                | 1.10 (0.82, 1.46)    |
| <b>Employment</b>                                      |                      |                     |                    |                      |
| Not Working                                            | 5,713                | Reference           | 1,291              | Reference            |
| Agriculture                                            | 2,355                | 0.73 (0.64, 0.82) * | 3,565              | 0.63 (0.52, 0.77) *  |
| Skilled Manual <sup>3</sup>                            | 1,312                | 0.94 (0.81, 1.09)   | 2,886              | 1.06 (0.88, 1.28)    |
| Skilled <sup>4</sup>                                   | 5,644                | 1.46 (1.33, 1.60) * | 5,799              | 2.03 (1.71, 2.41) *  |
| <b>Physical Activity in the Last Week<sup>5</sup>:</b> |                      |                     |                    |                      |
| No Vigorous Activity                                   | 13,001               | Reference           | 8,360              | Reference            |
| Vigorous Activity                                      | 1,556                | 0.94 (0.82, 1.07)   | 4,762              | 0.69 (0.62, 0.77) *  |
| No Moderate Activity                                   | 6,015                | Reference           | 6,126              | Reference            |
| Moderate Activity                                      | 8,542                | 1.18 (1.09, 1.28) * | 6,996              | 0.98 (0.89, 1.07)    |
| No Walking                                             | 4,706                | Reference           | 3,628              | Reference            |

## Online Supplemental Material

9

|    |                                          |        |                     |        |                     |
|----|------------------------------------------|--------|---------------------|--------|---------------------|
| 1  |                                          |        |                     |        |                     |
| 2  |                                          |        |                     |        |                     |
| 3  | Walking                                  | 9,851  | 0.98 (0.90, 1.07)   | 9,494  | 1.00 (0.90, 1.11)   |
| 4  |                                          |        |                     |        |                     |
| 5  |                                          |        |                     |        |                     |
| 6  | Consumed in the Last Week:               |        |                     |        |                     |
| 7  | <i>Instant Noodles</i>                   |        |                     |        |                     |
| 8  | No                                       | 5,125  | Reference           | 4,428  | Reference           |
| 9  | Yes                                      | 9,425  | 1.10 (1.01, 1.19) * | 8,685  | 1.03 (0.93, 1.14)   |
| 10 |                                          |        |                     |        |                     |
| 11 |                                          |        |                     |        |                     |
| 12 | <i>Fast Food</i>                         |        |                     |        |                     |
| 13 | No                                       | 12,902 | Reference           | 11,825 | Reference           |
| 14 | Yes                                      | 1,648  | 1.18 (1.04, 1.34) * | 1,288  | 1.55 (1.34, 1.80) * |
| 15 |                                          |        |                     |        |                     |
| 16 |                                          |        |                     |        |                     |
| 17 | <i>Soda</i>                              |        |                     |        |                     |
| 18 | No                                       | 12,620 | Reference           | 9,838  | Reference           |
| 19 | Yes                                      | 1,930  | 1.05 (0.93, 1.19)   | 3,275  | 1.13 (1.01, 1.25) * |
| 20 |                                          |        |                     |        |                     |
| 21 |                                          |        |                     |        |                     |
| 22 | <i>Fried Snacks</i>                      |        |                     |        |                     |
| 23 | No                                       | 5,253  | Reference           | 4,468  | Reference           |
| 24 | Yes                                      | 9,297  | 1.26 (1.16, 1.37) * | 8,645  | 1.22 (1.10, 1.35) * |
| 25 |                                          |        |                     |        |                     |
| 26 |                                          |        |                     |        |                     |
| 27 |                                          |        |                     |        |                     |
| 28 | Mean Number of Days                      |        |                     |        |                     |
| 29 | Consumed in the Last Week <sup>6</sup> : |        |                     |        |                     |
| 30 | Instant Noodles                          | 9,425  | 1.00 (0.97, 1.03)   | 8,685  | 0.95 (0.92, 0.98) * |
| 31 | Fast Food                                | 1,648  | 0.99 (0.91, 1.08)   | 1,288  | 0.96 (0.83, 1.11)   |
| 32 | Soda                                     | 1,930  | 1.01 (0.93, 1.09)   | 3,275  | 0.95 (0.90, 1.01)   |
| 33 | Fried Snacks                             | 9,297  | 1.04 (0.99, 1.06)   | 8,645  | 1.01 (0.99, 1.04)   |
| 34 |                                          |        |                     |        |                     |
| 35 |                                          |        |                     |        |                     |
| 36 | Food Expenditures <sup>7</sup>           |        |                     |        |                     |
| 37 | <i>Rice</i>                              |        |                     |        |                     |
| 38 | Lowest                                   | 7,946  | Reference           | 7,165  | Reference           |
| 39 | Highest                                  | 7,315  | 1.14 (1.05, 1.23) * | 6,583  | 0.99 (0.90, 1.08)   |
| 40 |                                          |        |                     |        |                     |
| 41 |                                          |        |                     |        |                     |
| 42 | <i>Cooking oil</i>                       |        |                     |        |                     |
| 43 | Lowest                                   | 9,192  | Reference           | 8,391  | Reference           |
| 44 | Highest                                  | 6,067  | 1.25 (1.15, 1.36) * | 5,355  | 1.34 (1.21, 1.47) * |
| 45 |                                          |        |                     |        |                     |
| 46 |                                          |        |                     |        |                     |
| 47 |                                          |        |                     |        |                     |
| 48 | Residence                                |        |                     |        |                     |
| 49 | Rural                                    | 6,242  | Reference           | 5,688  | Reference           |
| 50 | Urban                                    | 9,043  | 1.39 (1.29, 1.51) * | 8,097  | 1.92 (1.74, 2.12) * |
| 51 |                                          |        |                     |        |                     |
| 52 | Wealth                                   |        |                     |        |                     |
| 53 | Lowest                                   | 2,818  | Reference           | 2,879  | Reference           |
| 54 | Second                                   | 2,538  | 1.22 (1.06, 1.39) * | 2,528  | 1.25 (1.07, 1.47) * |
| 55 |                                          |        |                     |        |                     |
| 56 |                                          |        |                     |        |                     |
| 57 |                                          |        |                     |        |                     |
| 58 |                                          |        |                     |        |                     |
| 59 |                                          |        |                     |        |                     |
| 60 |                                          |        |                     |        |                     |

## Online Supplemental Material

10

|         |       |                     |       |                     |
|---------|-------|---------------------|-------|---------------------|
| Middle  | 1,829 | 1.19 (1.03, 1.38) * | 1,863 | 1.40 (1.18, 1.66) * |
| Fourth  | 2,129 | 1.14 (0.99, 1.32)   | 2,104 | 1.54 (1.31, 1.81) * |
| Highest | 1,998 | 1.19 (1.03, 1.36) * | 1,956 | 2.16 (1.85, 2.52) * |

## Family Size

|     |       |                   |       |                   |
|-----|-------|-------------------|-------|-------------------|
| ≤ 4 | 9,542 | Reference         | 8,590 | Reference         |
| > 4 | 5,743 | 0.96 (0.89, 1.04) | 5,195 | 0.97 (0.88, 1.07) |

---

CI = confidence interval

<sup>1</sup>Overweight is defined as body mass index  $\geq 25$  kg/m<sup>2</sup>

<sup>2</sup>Odds ratios and confidence intervals are estimated using logistic regression and are weighted to account for the survey design. Models exclude women who are currently pregnant.

<sup>3</sup>Skilled manual labor combines the following employment sectors: mining, manufacturing, electric, gas, water maintenance, and construction

<sup>4</sup>Skilled labor combines the following employment sectors: retail and service, transportation

<sup>5</sup>Defined using the International Physical Activity Questionnaire

<sup>6</sup>Modelled as a continuous variable, the average number of days consumed is queried if the respondent reported that they consumed item during the last week

<sup>7</sup>Indicates the household level expenditure on each item as a percentage of the households' total expenditures on food

\*  $p < 0.05$

**Supplemental Table 6. Univariable Logistic Regression Models Investigating the Associations Between Selected Characteristics and Overweight Among Children in Indonesia in 2014**

|                                                  | 6 months - 5 years <sup>1</sup> |                        | 6-12 years <sup>2</sup> |                        | 13-18 years <sup>2</sup> |                        |
|--------------------------------------------------|---------------------------------|------------------------|-------------------------|------------------------|--------------------------|------------------------|
|                                                  | n                               | Odds Ratio<br>(95% CI) | n                       | Odds Ratio<br>(95% CI) | n                        | Odds Ratio<br>(95% CI) |
| Mean Age <sup>3</sup>                            | 4,965                           | 0.88 (0.80, 0.97) *    | 7,012                   | 1.06 (1.02, 1.10) *    | 4,868                    | 0.87 (0.83, 0.92) *    |
| Gender                                           |                                 |                        |                         |                        |                          |                        |
| Boys                                             | 2,585                           | Reference              | 3,601                   | Reference              | 2,462                    | Reference              |
| Girls                                            | 2,380                           | 0.75 (0.59, 0.96) *    | 3,411                   | 0.87 (0.76, 1.01)      | 2,406                    | 1.20 (1.01, 1.44) *    |
| Ever Breastfed <sup>4</sup>                      |                                 |                        |                         |                        |                          |                        |
| No                                               | 140                             | Reference              |                         | na                     |                          | na                     |
| Yes                                              | 4,429                           | 1.15 (0.53, 2.47)      |                         | na                     |                          | na                     |
| Exclusively Breastfed <sup>4</sup>               |                                 |                        |                         |                        |                          |                        |
| No                                               | 3,646                           | Reference              |                         | na                     |                          | na                     |
| Yes                                              | 923                             | 0.82 (0.59, 1.15)      |                         | na                     |                          | na                     |
| Introduction of Complementary Foods <sup>4</sup> |                                 |                        |                         |                        |                          |                        |
| < 6 months or ≥ 8 months                         | 3,379                           | Reference              |                         | na                     |                          | na                     |
| ≥ 6 months to < 8 months                         | 840                             | 0.82 (0.58, 1.16)      |                         | na                     |                          | na                     |
| Parental Education <sup>5</sup>                  |                                 |                        |                         |                        |                          |                        |
| No Education                                     | 251                             | Reference              | 419                     | Reference              | 353                      | Reference              |
| Primary                                          | 1,562                           | 1.39 (0.65, 2.98)      | 2,449                   | 1.11 (0.76, 1.61)      | 1,904                    | 1.26 (0.83, 1.91)      |
| Junior or Senior                                 | 2,055                           | 1.69 (0.80, 3.59)      | 2,690                   | 1.70 (1.17, 2.46) *    | 1,555                    | 1.73 (1.14, 2.63) *    |
| University                                       | 564                             | 2.29 (1.04, 5.05) *    | 686                     | 3.00 (2.01, 4.47) *    | 331                      | 2.13 (1.31, 3.46) *    |



Online Supplemental Material

Parental Employment<sup>5</sup>

|                             |       |                     |       |                     |       |                     |
|-----------------------------|-------|---------------------|-------|---------------------|-------|---------------------|
| Not Working                 | 2,564 | Reference           | 2,804 | Reference           | 1,729 | Reference           |
| Agriculture                 | 569   | 0.51 (0.30, 0.86) * | 1,111 | 0.50 (0.38, 0.65)   | 737   | 0.51 (0.37, 0.71) * |
| Skilled Manual <sup>6</sup> | 325   | 0.98 (0.60, 1.60)   | 559   | 0.81 (0.61, 1.08)   | 394   | 0.72 (0.50, 1.04)   |
| Skilled <sup>7</sup>        | 1,469 | 1.22 (0.94, 1.59)   | 2,399 | 1.22 (1.04, 1.43) * | 1,550 | 0.94 (0.76, 1.15)   |

Maternal Overweight

|                |       |                     |       |                     |       |                     |
|----------------|-------|---------------------|-------|---------------------|-------|---------------------|
| Not Overweight | 3,068 | Reference           | 3,864 | Reference           | 2,459 | Reference           |
| Overweight     | 1,664 | 1.31 (1.02, 1.67) * | 2,597 | 2.03 (1.75, 2.37) * | 1,835 | 2.18 (1.80, 2.64) * |

Consumed in the Last Week:

*Instant Noodles*

|     |       |                     |       |                   |       |                   |
|-----|-------|---------------------|-------|-------------------|-------|-------------------|
| No  | 2,002 | Reference           | 1,616 | Reference         | 581   | Reference         |
| Yes | 2,613 | 0.69 (0.53, 0.90) * | 5,382 | 1.03 (0.87, 1.23) | 2,076 | 1.03 (0.78, 1.36) |

*Fast Food*

|     |       |                     |       |                     |       |                   |
|-----|-------|---------------------|-------|---------------------|-------|-------------------|
| No  | 3,941 | Reference           | 5,669 | Reference           | 2,209 | Reference         |
| Yes | 674   | 1.39 (1.01, 1.93) * | 1,329 | 1.43 (1.21, 1.69) * | 448   | 1.13 (0.85, 1.50) |

*Soda*

|     |       |                   |       |                   |       |                   |
|-----|-------|-------------------|-------|-------------------|-------|-------------------|
| No  | 4,342 | Reference         | 5,942 | Reference         | 2,011 | Reference         |
| Yes | 273   | 0.89 (0.50, 1.59) | 1,056 | 1.17 (0.97, 1.42) | 646   | 1.09 (0.84, 1.41) |

*Fried Snacks*

|     |       |                   |       |                   |       |                   |
|-----|-------|-------------------|-------|-------------------|-------|-------------------|
| No  | 2,393 | Reference         | 2,531 | Reference         | 825   | Reference         |
| Yes | 2,222 | 0.83 (0.64, 1.08) | 4,467 | 1.12 (0.96, 1.31) | 1,832 | 0.99 (0.78, 1.26) |

Mean Number of Days

Consumed in the Last Week<sup>8</sup>:

|                 |       |                   |       |                   |       |                   |
|-----------------|-------|-------------------|-------|-------------------|-------|-------------------|
| Instant Noodles | 2,613 | 1.00 (0.91, 1.10) | 5,382 | 0.99 (0.95, 1.03) | 2,076 | 0.99 (0.93, 1.05) |
|-----------------|-------|-------------------|-------|-------------------|-------|-------------------|

## Online Supplemental Material

13

|              |       |                   |       |                   |       |                   |
|--------------|-------|-------------------|-------|-------------------|-------|-------------------|
| Fast Food    | 674   | 0.88 (0.74, 1.05) | 1,329 | 0.91 (0.83, 1.00) | 448   | 0.90 (0.77, 1.05) |
| Soda         | 2,222 | 0.89 (0.51, 1.55) | 1,056 | 1.05 (0.96, 1.16) | 646   | 1.10 (0.98, 1.24) |
| Fried Snacks | 3,671 | 0.97 (0.89, 1.05) | 4,467 | 0.98 (0.94, 1.01) | 1,832 | 0.97 (0.92, 1.03) |

Food Expenditures<sup>9</sup>

|                    |       |                   |       |                   |       |                   |
|--------------------|-------|-------------------|-------|-------------------|-------|-------------------|
| <i>Rice</i>        |       |                   |       |                   |       |                   |
| Lowest             | 2,469 | Reference         | 3,334 | Reference         | 2,151 | Reference         |
| Highest            | 2,489 | 1.15 (0.91, 1.46) | 3,662 | 0.86 (0.75, 1.00) | 2,704 | 0.93 (0.78, 1.11) |
| <i>Cooking oil</i> |       |                   |       |                   |       |                   |
| Lowest             | 2,992 | Reference         | 3,993 | Reference         | 2,785 | Reference         |
| Highest            | 1,966 | 1.23 (0.97, 1.57) | 3,002 | 1.16 (1.00, 1.34) | 2,071 | 1.11 (0.93, 1.33) |

## Residence

|       |       |                     |       |                     |       |                     |
|-------|-------|---------------------|-------|---------------------|-------|---------------------|
| Rural | 2,083 | Reference           | 2,915 | Reference           | 1,969 | Reference           |
| Urban | 2,882 | 1.57 (1.22, 2.02) * | 4,097 | 2.01 (1.72, 2.35) * | 2,899 | 1.71 (1.42, 2.07) * |

## Wealth

|         |       |                   |       |                     |     |                   |
|---------|-------|-------------------|-------|---------------------|-----|-------------------|
| Lowest  | 1,008 | Reference         | 1,247 | Reference           | 876 | Reference         |
| Second  | 964   | 1.37 (0.91, 2.06) | 1,193 | 1.50 (1.14, 1.98) * | 802 | 1.12 (0.83, 1.52) |
| Middle  | 654   | 1.25 (0.79, 1.98) | 908   | 1.78 (1.34, 2.36) * | 566 | 1.06 (0.76, 1.48) |
| Fourth  | 783   | 1.42 (0.93, 2.15) | 1,037 | 1.64 (1.25, 2.15) * | 617 | 1.08 (0.77, 1.51) |
| Highest | 656   | 1.37 (0.89, 2.11) | 993   | 1.83 (1.39, 2.40) * | 617 | 1.12 (0.82, 1.54) |

## Family Size

|     |       |                   |       |                     |       |                     |
|-----|-------|-------------------|-------|---------------------|-------|---------------------|
| ≤ 4 | 2,645 | Reference         | 3,523 | Reference           | 2,322 | Reference           |
| > 4 | 2,320 | 0.99 (0.78, 1.26) | 3,489 | 0.75 (0.65, 0.87) * | 2,546 | 0.83 (0.70, 0.99) * |

CI = confidence interval; na = not applicable

<sup>1</sup>Overweight is defined as weight-for-height z-score > 2 using the MGRS Standard, estimated using logistic regression models and are weighted to account for the survey design

Online Supplemental Material

1  
2  
3  
4  
5  
6  
7  
8  
9  
10  
11  
12  
13  
14  
15  
16  
17  
18  
19  
20  
21  
22  
23  
24  
25  
26  
27  
28  
29  
30  
31  
32  
33  
34  
35  
36  
37  
38  
39  
40  
41  
42  
43  
44  
45  
46  
47

<sup>2</sup>Overweight is defined as BMI z-score > 1 using the WHO reference, estimated using logistic regression models and are weighted to account for the survey design

<sup>3</sup>Modelled as a continuous variable

<sup>4</sup>Breastfeeding data are reported by the mother retrospectively. Exclusively breastfed indicates whether the child was only given breastmilk (no water or complementary foods) when the child was aged 0-6 months. Complementary foods indicate appropriate timing of complementary foods, that is, the introduction of complementary foods when the child was 6-8 months old.

<sup>5</sup>Parental characteristics are of the mother, when available. When not available the characteristic is based on the father's data

<sup>6</sup>Skilled manual labor combines the following employment sectors: mining, manufacturing, electric, gas, water maintenance, and construction

<sup>7</sup>Skilled labor combines the following employment sectors: retail and service, transportation

<sup>8</sup>Modelled as a continuous variable, the average number of days consumed is queried if the respondent reported that they consumed item during the last week

<sup>9</sup>Indicates the household level expenditure on each item as a percentage of the households' total expenditures on food

For peer review only

**Supplemental Table 7. Longitudinal Associations Between Selected Characteristics and Overweight Among Adult Women Aged 19 + in Indonesia 1993-2014**

|                                |                             | Risk Ratio (95% Confidence Interval) |                              |
|--------------------------------|-----------------------------|--------------------------------------|------------------------------|
|                                |                             | Univariate <sup>1,2</sup>            | Multivariable <sup>1,2</sup> |
|                                |                             | Risk Ratio (95% CI)                  | Risk Ratio (95% CI)          |
| Age (years)                    | N=29,541                    |                                      |                              |
|                                | 19-29                       | Reference                            | Reference                    |
|                                | 30-39                       | 2.00 (1.85, 2.17) *                  | 1.75 (1.56, 1.97) *          |
|                                | 40-49                       | 2.33 (2.16, 2.51) *                  | 2.02 (1.80, 2.27) *          |
|                                | 50-59                       | 1.85 (1.71, 2.00) *                  | 1.76 (1.56, 1.98) *          |
|                                | 60+                         | 1.09 (1.00, 1.19) *                  | 1.39 (1.21, 1.59) *          |
| Education                      | N=25,970                    |                                      |                              |
|                                | No Education                | Reference                            | Reference                    |
|                                | Primary                     | 2.05 (1.89, 2.23) *                  | 1.63 (1.47, 1.80) *          |
|                                | Junior or Senior            | 2.00 (1.82, 2.18) *                  | 1.60 (1.42, 1.80) *          |
|                                | University                  | 2.03 (1.81, 2.28) *                  | 1.53 (1.32, 1.78) *          |
| Smoking Status                 | N=28,967                    |                                      |                              |
|                                | Non-Smoker                  | Reference                            | Reference                    |
|                                | Smoker                      | 0.58 (0.51, 0.66) *                  | 0.75 (0.65, 0.87) *          |
| Marital Status                 | N=29,055                    |                                      |                              |
|                                | Never Married               | Reference                            | Reference                    |
|                                | Married                     | 3.03 (2.63, 3.49) *                  | 2.25 (1.81, 2.81) *          |
|                                | Other                       | 2.01 (1.73, 2.34) *                  | 1.60 (1.25, 2.06) *          |
| Employment                     | N=28,726                    |                                      |                              |
|                                | Not Working                 | Reference                            | Reference                    |
|                                | Agriculture                 | 0.72 (0.67, 0.77) *                  | 0.77 (0.71, 0.84) *          |
|                                | Skilled Manual <sup>3</sup> | 0.90 (0.82, 0.98) *                  | 0.93 (0.84, 1.04)            |
|                                | Skilled <sup>4</sup>        | 1.30 (1.23, 1.36) *                  | 1.13 (1.07, 1.20) *          |
| Food Expenditures <sup>5</sup> |                             |                                      |                              |
|                                | <i>Rice</i>                 | N=28,654                             |                              |
|                                | Lowest                      | Reference                            | Reference                    |
|                                | Highest                     | 1.12 (1.07, 1.17) *                  | 1.00 (0.95, 1.06)            |
|                                | <i>Soda</i>                 | N=27,508                             |                              |
|                                | Lowest                      | Reference                            | Reference                    |
|                                | Highest                     | 1.26 (1.19, 1.33) *                  | 1.13 (1.06, 1.21) *          |

## Online Supplemental Material

16

|             |                    |          |                     |                     |
|-------------|--------------------|----------|---------------------|---------------------|
|             | <i>Snacks</i>      | N=29,057 |                     |                     |
|             | Lowest             |          | Reference           | Reference           |
|             | Highest            |          | 1.20 (1.15, 1.25) * | 1.03 (0.98, 1.09)   |
|             | <i>Cooking oil</i> | N=29,172 |                     |                     |
|             | Lowest             |          | Reference           | Reference           |
|             | Highest            |          | 1.31 (1.25, 1.37) * | 1.17 (1.11, 1.23) * |
| Residence   |                    | N=29,537 |                     |                     |
|             | Rural              |          | Reference           | Reference           |
|             | Urban              |          | 1.49 (1.43, 1.56) * | 1.31 (1.24, 1.39) * |
| Wealth      |                    | N=23,055 |                     |                     |
|             | Lowest             |          | Reference           | Reference           |
|             | Second             |          | 1.21 (1.11, 1.31) * | 1.16 (1.06, 1.26) * |
|             | Middle             |          | 1.26 (1.16, 1.36) * | 1.17 (1.07, 1.27) * |
|             | Fourth             |          | 1.37 (1.26, 1.48) * | 1.21 (1.11, 1.32) * |
|             | Highest            |          | 1.40 (1.30, 1.52) * | 1.17 (1.07, 1.27) * |
| Family Size |                    | N=29,540 |                     |                     |
|             | ≤ 4                |          | Reference           | Reference           |
|             | > 4                |          | 1.08 (1.03, 1.13) * | 0.93 (0.88, 0.99) * |

CI = confidence interval

<sup>1</sup>Overweight is defined as body mass index  $\geq 25$  kg/m<sup>2</sup><sup>2</sup>Risk Ratios and confidence intervals are estimated using a modified Poisson model and are weighted to account for the survey design. Excludes pregnant women. N=18,018 in multivariable model<sup>3</sup>Skilled manual labor combines the following employment sectors: mining, manufacturing, electric, gas, water maintenance, and construction<sup>4</sup>Skilled labor combines the following employment sectors: retail and service, transportation<sup>5</sup>Indicates the household level expenditure on each item as a percentage of the households' total expenditures on food\*  $p < 0.05$

**Supplemental Table 8. Longitudinal Association Between Selected Characteristics and Overweight Among Adult Men Aged 19 + in Indonesia 1993-2014**

|                                |                             | Univariate <sup>1,2</sup> | Multivariable <sup>1,2</sup> |
|--------------------------------|-----------------------------|---------------------------|------------------------------|
|                                |                             | Risk Ratio (95% CI)       | Risk Ratio (95% CI)          |
| Age                            | N=24,169                    |                           |                              |
|                                | 19-29 y                     | Reference                 | Reference                    |
|                                | 30-39 y                     | 2.18 (1.90, 2.50) *       | 1.74 (1.32, 2.28) *          |
|                                | 40-49 y                     | 2.64 (2.32, 3.00) *       | 2.04 (1.57, 2.66) *          |
|                                | 50-59 y                     | 2.18 (1.92, 2.47) *       | 1.90 (1.46, 2.48) *          |
|                                | 60+ y                       | 1.13 (0.98, 1.30)         | 1.24 (0.94, 1.65)            |
| Education                      | N=21,072                    |                           |                              |
|                                | No Education                | Reference                 | Reference                    |
|                                | Primary                     | 2.26 (1.74, 2.94) *       | 1.56 (1.17, 2.08) *          |
|                                | Junior or Senior            | 4.06 (3.11, 5.29) *       | 2.39 (1.77, 3.22) *          |
|                                | University                  | 6.80 (5.18, 8.94) *       | 2.82 (2.07, 3.85) *          |
| Smoking Status                 | N=23,764                    |                           |                              |
|                                | Non-smoker                  | Reference                 | Reference                    |
|                                | Smoker                      | 0.54 (0.50, 0.58) *       | 0.66 (0.60, 0.72) *          |
| Marital Status                 | N=23,846                    |                           |                              |
|                                | Never Married               | Reference                 | Reference                    |
|                                | Married                     | 2.07 (1.80, 2.38) *       | 1.87 (1.38, 2.53) *          |
|                                | Other                       | 1.35 (1.02, 1.78) *       | 1.41 (0.85, 2.33)            |
| Employment                     | N=23,463                    |                           |                              |
|                                | Not Working                 | Reference                 | Reference                    |
|                                | Agriculture                 | 0.65 (0.55, 0.76) *       | 0.60 (0.50, 0.72) *          |
|                                | Skilled Manual <sup>3</sup> | 1.19 (1.02, 1.38) *       | 0.92 (0.76, 1.10)            |
|                                | Skilled <sup>4</sup>        | 2.10 (1.85, 2.39) *       | 1.30 (1.12, 1.52) *          |
| Food Expenditures <sup>5</sup> |                             |                           |                              |
|                                | <i>Rice</i>                 | N=23,310                  |                              |
|                                | Lowest                      | Reference                 | na                           |
|                                | Highest                     | 1.01 (0.93, 1.09)         | na                           |
|                                | <i>Soda</i>                 | N=22,283                  |                              |
|                                | Lowest                      | Reference                 | Reference                    |
|                                | Highest                     | 1.56 (1.43, 1.71) *       | 1.15 (1.05, 1.27) *          |

## Online Supplemental Material

18

|             |                    |          |                     |                     |
|-------------|--------------------|----------|---------------------|---------------------|
|             | <i>Snacks</i>      | N=23,703 |                     |                     |
|             | Lowest             |          | Reference           | Reference           |
|             | Highest            |          | 1.58 (1.46, 1.71) * | 1.11 (1.01, 1.22) * |
|             | <i>Cooking oil</i> | N=23,797 |                     |                     |
|             | Lowest             |          | Reference           | Reference           |
|             | Highest            |          | 1.55 (1.44, 1.68) * | 1.23 (1.12, 1.34) * |
| Residence   |                    | N=24,168 |                     |                     |
|             | Rural              |          | Reference           | Reference           |
|             | Urban              |          | 1.97 (1.82, 2.14) * | 1.27 (1.15, 1.40) * |
| Wealth      |                    | N=21,036 |                     |                     |
|             | Lowest             |          | Reference           | Reference           |
|             | Second             |          | 1.26 (1.09, 1.46) * | 1.10 (0.94, 1.29) * |
|             | Middle             |          | 1.56 (1.35, 1.80) * | 1.30 (1.12, 1.52) * |
|             | Fourth             |          | 1.79 (1.56, 2.06) * | 1.30 (1.12, 1.51) * |
|             | Highest            |          | 2.44 (2.14, 2.79) * | 1.39 (1.20, 1.62) * |
| Family Size |                    | N=24,169 |                     |                     |
|             | ≤ 4                |          | Reference           | Reference           |
|             | > 4                |          | 1.11 (1.02, 1.20) * | 1.02 (0.93, 1.12)   |

CI = confidence interval; na = not applicable

<sup>1</sup>Overweight is defined as BMI ≥ 25 kg/m<sup>2</sup>

<sup>2</sup>Risk Ratios and confidence intervals are estimated using a modified Poisson model and are weighted to account for the survey design. N=16,519 in multivariable model

<sup>3</sup>Skilled manual labor combines the following employment sectors: mining, manufacturing, electric, gas, water maintenance, and construction

<sup>4</sup>Skilled labor combines the following employment sectors: retail and service, transportation

<sup>5</sup>Indicates the household level expenditure on each item as a percentage of the households' total expenditures on food

\*  $p < 0.05$

STROBE Statement—Checklist of items that should be included in reports of *cross-sectional studies*

|                              | Item No | Recommendation                                                                                                                                                                                    | Page Number                                                                                                                       |
|------------------------------|---------|---------------------------------------------------------------------------------------------------------------------------------------------------------------------------------------------------|-----------------------------------------------------------------------------------------------------------------------------------|
| <b>Title and abstract</b>    | 1       | (a) Indicate the study's design with a commonly used term in the title or the abstract                                                                                                            | Page 2                                                                                                                            |
|                              |         | (b) Provide in the abstract an informative and balanced summary of what was done and what was found                                                                                               | Page 2                                                                                                                            |
| <b>Introduction</b>          |         |                                                                                                                                                                                                   |                                                                                                                                   |
| Background/rationale         | 2       | Explain the scientific background and rationale for the investigation being reported                                                                                                              | Pages 4-5                                                                                                                         |
| Objectives                   | 3       | State specific objectives, including any prespecified hypotheses                                                                                                                                  | Page 5                                                                                                                            |
| <b>Methods</b>               |         |                                                                                                                                                                                                   |                                                                                                                                   |
| Study design                 | 4       | Present key elements of study design early in the paper                                                                                                                                           | Pages 5,9                                                                                                                         |
| Setting                      | 5       | Describe the setting, locations, and relevant dates, including periods of recruitment, exposure, follow-up, and data collection                                                                   | Page 5                                                                                                                            |
| Participants                 | 6       | (a) Give the eligibility criteria, and the sources and methods of selection of participants                                                                                                       | Pages 5,9                                                                                                                         |
| Variables                    | 7       | Clearly define all outcomes, exposures, predictors, potential confounders, and effect modifiers. Give diagnostic criteria, if applicable                                                          | Pages 7-8                                                                                                                         |
| Data sources/<br>measurement | 8*      | For each variable of interest, give sources of data and details of methods of assessment (measurement). Describe comparability of assessment methods if there is more than one group              | Pages 5-7                                                                                                                         |
| Bias                         | 9       | Describe any efforts to address potential sources of bias                                                                                                                                         | Page 9                                                                                                                            |
| Study size                   | 10      | Explain how the study size was arrived at                                                                                                                                                         | Page 9, see flow chart                                                                                                            |
| Quantitative variables       | 11      | Explain how quantitative variables were handled in the analyses. If applicable, describe which groupings were chosen and why                                                                      | Page 8                                                                                                                            |
| Statistical methods          | 12      | (a) Describe all statistical methods, including those used to control for confounding                                                                                                             | Pages 8-9                                                                                                                         |
|                              |         | (b) Describe any methods used to examine subgroups and interactions                                                                                                                               | Page 9                                                                                                                            |
|                              |         | (c) Explain how missing data were addressed                                                                                                                                                       | Not applicable                                                                                                                    |
|                              |         | (d) If applicable, describe analytical methods taking account of sampling strategy                                                                                                                | Page 9                                                                                                                            |
|                              |         | (e) Describe any sensitivity analyses                                                                                                                                                             | Page 9                                                                                                                            |
| <b>Results</b>               |         |                                                                                                                                                                                                   |                                                                                                                                   |
| Participants                 | 13*     | (a) Report numbers of individuals at each stage of study—eg numbers potentially eligible, examined for eligibility, confirmed eligible, included in the study, completing follow-up, and analysed | For this secondary data analysis, individuals were included if they had complete data for the exposure, outcome, and confounders. |



|                          |     |                                                                                                                                                                                                              |                                                                                                                                                              |
|--------------------------|-----|--------------------------------------------------------------------------------------------------------------------------------------------------------------------------------------------------------------|--------------------------------------------------------------------------------------------------------------------------------------------------------------|
|                          |     | (b) Give reasons for non-participation at each stage                                                                                                                                                         | For this secondary data analysis, individuals were included if they had complete data for the exposure, outcome, and confounders.                            |
|                          |     | (c) Consider use of a flow diagram                                                                                                                                                                           | See Supplemental Figure 1                                                                                                                                    |
| Descriptive data         | 14* | (a) Give characteristics of study participants (eg demographic, clinical, social) and information on exposures and potential confounders                                                                     | Pages 9-11                                                                                                                                                   |
|                          |     | (b) Indicate number of participants with missing data for each variable of interest                                                                                                                          | See Supplemental Figure 1. For this secondary data analysis, individuals were included if they had complete data for the exposure, outcome, and confounders. |
| Outcome data             | 15* | Report numbers of outcome events or summary measures                                                                                                                                                         | Pages 9, Figure 1                                                                                                                                            |
| Main results             | 16  | (a) Give unadjusted estimates and, if applicable, confounder-adjusted estimates and their precision (eg, 95% confidence interval). Make clear which confounders were adjusted for and why they were included | Provided in supplemental material                                                                                                                            |
|                          |     | (b) Report category boundaries when continuous variables were categorized                                                                                                                                    | Page 8, Tables 1-6                                                                                                                                           |
|                          |     | (c) If relevant, consider translating estimates of relative risk into absolute risk for a meaningful time period                                                                                             | Not applicable                                                                                                                                               |
| Other analyses           | 17  | Report other analyses done—eg analyses of subgroups and interactions, and sensitivity analyses                                                                                                               | Supplemental Tables 4 and 5                                                                                                                                  |
| <b>Discussion</b>        |     |                                                                                                                                                                                                              |                                                                                                                                                              |
| Key results              | 18  | Summarise key results with reference to study objectives                                                                                                                                                     | Page 13-15                                                                                                                                                   |
| Limitations              | 19  | Discuss limitations of the study, taking into account sources of potential bias or imprecision. Discuss both direction and magnitude of any potential bias                                                   | Page 16                                                                                                                                                      |
| Interpretation           | 20  | Give a cautious overall interpretation of results considering objectives, limitations, multiplicity of analyses, results from similar studies, and other relevant evidence                                   | Pages 13-15                                                                                                                                                  |
| Generalisability         | 21  | Discuss the generalisability (external validity) of the study results                                                                                                                                        | Page 16                                                                                                                                                      |
| <b>Other information</b> |     |                                                                                                                                                                                                              |                                                                                                                                                              |
| Funding                  | 22  | Give the source of funding and the role of the funders for the present study and, if applicable, for the original study on which the present article is based                                                | Not applicable                                                                                                                                               |

1  
2 \*Give information separately for exposed and unexposed groups.  
3

4 **Note:** An Explanation and Elaboration article discusses each checklist item and gives methodological background and  
5 published examples of transparent reporting. The STROBE checklist is best used in conjunction with this article (freely  
6 available on the Web sites of PLoS Medicine at <http://www.plosmedicine.org/>, Annals of Internal Medicine at  
7 <http://www.annals.org/>, and Epidemiology at <http://www.epidem.com/>). Information on the STROBE Initiative is  
8 available at [www.strobe-statement.org](http://www.strobe-statement.org).  
9  
10  
11  
12  
13  
14  
15  
16  
17  
18  
19  
20  
21  
22  
23  
24  
25  
26  
27  
28  
29  
30  
31  
32  
33  
34  
35  
36  
37  
38  
39  
40  
41  
42  
43  
44  
45  
46  
47  
48  
49  
50  
51  
52  
53  
54  
55  
56  
57  
58  
59  
60
