# Supplementary material for: Overweight in Indonesia: an observational study of trends and risk factors among adults and children
Source: PubMed Central journal article supplement — BMJ Open. 2019 Sep 27;9(9):e031198. doi: 10.1136/bmjopen-2019-031198 (PMC6773342; doi:10.1136/bmjopen-2019-031198), 2019-09-27
Supplement: bmjopen-2019-031198supp001.pdf [file bmjopen-2019-031198supp001.pdf]

## Online Supplemental Material

**Supplemental Table 1. Obesity Related Factors Available in the Indonesian Family Life Survey**

|                                     |                                       | 1993 | 1997 | 2000 | 2007 | 2014 |
|-------------------------------------|---------------------------------------|------|------|------|------|------|
| <b>Household-Level Factors</b>      |                                       |      |      |      |      |      |
| Urbanization                        | Urban/Rural                           | *    | *    | *    | *    | *    |
| Wealth                              | Asset type                            | *    | *    | *    | *    | *    |
| Expenditures                        | Soda, snacks, cooking oil, rice       | *    | *    | *    | *    | *    |
| Family Size                         | Number in household                   | *    | *    | *    | *    | *    |
| <b>Individual-Level Factors</b>     |                                       |      |      |      |      |      |
| <b>Adults</b>                       |                                       |      |      |      |      |      |
| Demographics                        | Age, Gender, Marital Status           | *    | *    | *    | *    | *    |
| Education                           | Highest education attained            | *    | *    | *    | *    | *    |
| Employment                          | Worked in last week, occupation       | *    | *    | *    | *    | *    |
| Parity                              | Among ever married women              | *    | *    | *    | *    | *    |
| Smoking                             | Ever smoker, currently smoking        | *    | *    | *    | *    | *    |
| Physical Activity                   | Vigorous, moderate, walking, last 7d  | ---  | ---  | ---  | *    | *    |
| <b>Children</b>                     |                                       |      |      |      |      |      |
| Demographics                        | Age, gender                           | *    | *    | *    | *    | *    |
| Parental Characteristics            | Education, employment, overweight     | *    | *    | *    | *    | *    |
| Early Life Nutrition <sup>1</sup>   | Ever breastfed, exclusively breastfed | *    | *    | *    | *    | *    |
| <b>Diet</b>                         |                                       |      |      |      |      |      |
| Instant noodles                     | Days per week, mean number days       | ---  | ---  | ---  | ---  | *    |
| Soft drink (e.g. coca cola, sprite) | Days per week, mean number days       | ---  | ---  | ---  | ---  | *    |
| Fried snacks (e.g. tempe, tahu)     | Days per week, mean number days       | ---  | ---  | ---  | ---  | *    |
| Fast Food                           | Days per week, mean number days       | ---  | ---  | ---  | ---  | *    |
| Staple Foods (e.g. rice, eggs)      | Days per week, mean number days       | ---  | ---  | *    | *    | *    |
| <b>Anthropometry and Health</b>     |                                       |      |      |      |      |      |
| Height                              |                                       | *    | *    | *    | *    | *    |
| Weight                              |                                       | *    | *    | *    | *    | *    |
| Waist Circumference                 |                                       | ---  | ---  | *    | *    | *    |
| Blood Pressure                      |                                       | ---  | *    | *    | *    | *    |
| Pulse                               |                                       | ---  | *    | *    | *    | *    |
| Medication Use                      |                                       | ---  | ---  | *    | *    | *    |
| Dried Blood Spots <sup>1</sup>      |                                       | ---  | ---  | ---  | *    | *    |

\* data are available in given year --- data not available

<sup>1</sup> Queried among ever married women for children they had in the last 5 years

## Online Supplemental Material

**Supplemental Table 2. Percent Distribution of Selected Characteristics Among Overweight Children Aged 0-5 in Indonesia Over Time**

|                                    | 1993 <sup>1</sup> |      | 1997 <sup>1</sup> |       | 2000 <sup>1</sup> |      | 2007 <sup>1</sup> |      | 2014 <sup>1</sup> |      |  |
|------------------------------------|-------------------|------|-------------------|-------|-------------------|------|-------------------|------|-------------------|------|--|
|                                    | n                 | %    | n                 | %     | n                 | %    | n                 | %    | n                 | %    |  |
| Age (years)                        |                   |      |                   |       |                   |      |                   |      |                   |      |  |
| 0-2                                | 58                | 76.6 | 88                | 81.5  | 145               | 72.2 | 301               | 72.7 | 230               | 62.4 |  |
| 3-5                                | 20                | 23.4 | 21                | 18.5  | 47                | 27.8 | 107               | 27.3 | 133               | 37.6 |  |
| Gender                             |                   |      |                   |       |                   |      |                   |      |                   |      |  |
| Boys                               | 40                | 52.7 | 56                | 47.9  | 112               | 58.2 | 236               | 55.1 | 210               | 57.7 |  |
| Girls                              | 38                | 47.3 | 109               | 52.1  | 80                | 41.8 | 172               | 44.9 | 153               | 42.3 |  |
| Ever Breastfed <sup>2</sup>        |                   |      |                   |       |                   |      |                   |      |                   |      |  |
| No                                 | 4                 | 5.4  | 0                 | 0     | 3                 | 2.4  | 11                | 3.2  | 10                | 2.7  |  |
| Yes                                | 46                | 94.6 | 25                | 100.0 | 132               | 97.6 | 350               | 96.8 | 318               | 97.3 |  |
| Exclusively Breastfed <sup>2</sup> |                   |      |                   |       |                   |      |                   |      |                   |      |  |
| No                                 | 49                | 95.4 | 23                | 88.9  | 131               | 96.1 | 332               | 92.8 | 274               | 84.4 |  |
| Yes                                | 1                 | 4.6  | 2                 | 11.1  | 4                 | 3.9  | 29                | 7.2  | 54                | 19.6 |  |
| Complementary Foods <sup>2</sup>   |                   |      |                   |       |                   |      |                   |      |                   |      |  |
| < 6 mo or ≥ 8 mo                   | 41                | 94.8 | 21                | 100   | 110               | 96.2 | 290               | 91.2 | 247               | 55.8 |  |
| ≥ 6 mo to < 8 mo                   | 1                 | 5.2  | 0                 | 0     | 4                 | 3.8  | 31                | 8.8  | 51                | 44.2 |  |
| Parental Education <sup>3</sup>    |                   |      |                   |       |                   |      |                   |      |                   |      |  |
| No Education                       | 9                 | 17.0 | 19                | 18.0  | 20                | 11.6 | 24                | 8.1  | 11                | 3.9  |  |
| Primary                            | 31                | 61.1 | 53                | 57.4  | 98                | 51.4 | 118               | 35.1 | 96                | 33.0 |  |
| Junior or Senior                   | 12                | 17.7 | 18                | 17.5  | 56                | 29.3 | 169               | 45.3 | 156               | 47.3 |  |
| University                         | 3                 | 4.2  | 7                 | 7.0   | 14                | 7.7  | 44                | 11.5 | 56                | 15.8 |  |
| Parental Employment <sup>3</sup>   |                   |      |                   |       |                   |      |                   |      |                   |      |  |
| Not working                        | 30                | 58.1 | 77                | 71.0  | 118               | 61.2 | 230               | 57.8 | 185               | 53.7 |  |
| Agriculture                        | 5                 | 9.3  | 5                 | 3.8   | 18                | 11.3 | 35                | 9.6  | 22                | 5.6  |  |
| Skilled Manual <sup>4</sup>        | 9                 | 16.1 | 9                 | 8.6   | 13                | 7.3  | 36                | 9.0  | 24                | 7.3  |  |
| Skilled <sup>5</sup>               | 11                | 16.5 | 17                | 16.5  | 39                | 20.2 | 103               | 23.5 | 130               | 33.4 |  |
| Maternal Overweight                |                   |      |                   |       |                   |      |                   |      |                   |      |  |
| Not Overweight                     | 33                | 79.5 | 88                | 85.1  | 158               | 88.3 | 288               | 73.3 | 198               | 58.7 |  |
| Overweight                         | 10                | 20.5 | 15                | 14.9  | 23                | 11.7 | 104               | 26.7 | 149               | 41.3 |  |
| Residence                          |                   |      |                   |       |                   |      |                   |      |                   |      |  |
| Rural                              | 46                | 70.6 | 56                | 55.6  | 91                | 49.0 | 151               | 44.2 | 123               | 39.2 |  |
| Urban                              | 32                | 29.4 | 53                | 44.4  | 101               | 51.0 | 257               | 55.8 | 240               | 60.8 |  |
| Wealth                             |                   |      |                   |       |                   |      |                   |      |                   |      |  |

## Online Supplemental Material

|         |    |      |    |      |    |      |     |      |    |      |
|---------|----|------|----|------|----|------|-----|------|----|------|
| Lowest  | 26 | 39.8 | 20 | 20.7 | 39 | 22.1 | 114 | 31.6 | 56 | 18.8 |
| Second  | 7  | 7.2  | 15 | 14.8 | 37 | 21.0 | 80  | 22.4 | 69 | 25.0 |
| Middle  | 12 | 17.0 | 27 | 25.2 | 34 | 19.9 | 60  | 19.3 | 43 | 16.3 |
| Fourth  | 19 | 28.3 | 15 | 14.6 | 31 | 19.2 | 53  | 15.2 | 65 | 22.5 |
| Highest | 13 | 7.7  | 24 | 24.7 | 29 | 17.7 | 46  | 11.4 | 52 | 17.4 |

## Family Size

|     |    |      |    |      |     |      |     |      |     |      |
|-----|----|------|----|------|-----|------|-----|------|-----|------|
| ≤ 4 | 26 | 22.1 | 30 | 26.9 | 86  | 46.9 | 167 | 41.1 | 195 | 54.2 |
| > 4 | 52 | 77.9 | 79 | 73.1 | 106 | 53.1 | 241 | 58.9 | 168 | 45.8 |

<sup>1</sup>Overweight is defined as weight-for-height z-score > 2 using the MGRS Standard. Percentages are weighted to be representative of the population of Indonesia in the given survey year

<sup>2</sup>Breastfeeding data are reported by the mother retrospectively. Exclusively breastfed indicates whether the child was only given breastmilk (no water or complementary foods) when the child was aged 0-6 months. Complementary foods indicate appropriate timing of complementary foods, that is, the introduction of complementary foods when the child was 6-8 months old.

<sup>3</sup>Parental characteristics are of the mother, when available. When not available the characteristic is based on the father's data

<sup>4</sup>Skilled manual labor combines the following employment sectors: mining, manufacturing, electric, gas, water maintenance, and construction

<sup>5</sup>Skilled labor combines the following employment sectors: retail and service, transportation

## Online Supplemental Material

**Supplemental Table 3. Percent Distribution of Selected Characteristics Among Overweight Children Aged 6-12 in Indonesia Over Time**

|                                  | 1993 <sup>1</sup> |      | 1997 <sup>1</sup> |      | 2000 <sup>1</sup> |      | 2007 <sup>1</sup> |      | 2014 <sup>1</sup> |      |  |
|----------------------------------|-------------------|------|-------------------|------|-------------------|------|-------------------|------|-------------------|------|--|
|                                  | n                 | %    | n                 | %    | n                 | %    | n                 | %    | n                 | %    |  |
| Age (years)                      |                   |      |                   |      |                   |      |                   |      |                   |      |  |
| 6-9                              | 113               | 55.6 | 183               | 58.6 | 206               | 59.0 | 495               | 59.0 | 760               | 53.3 |  |
| 10-12                            | 48                | 44.4 | 90                | 41.4 | 91                | 41.0 | 200               | 41.0 | 332               | 46.7 |  |
| Gender                           |                   |      |                   |      |                   |      |                   |      |                   |      |  |
| Boys                             | 77                | 44.0 | 144               | 51.4 | 166               | 54.5 | 387               | 55.1 | 601               | 53.4 |  |
| Girls                            | 84                | 56.0 | 132               | 48.6 | 133               | 45.5 | 310               | 44.9 | 492               | 46.6 |  |
| Parental Education <sup>2</sup>  |                   |      |                   |      |                   |      |                   |      |                   |      |  |
| No Education                     | 10                | 7.5  | 126               | 27.3 | 42                | 15.2 | 51                | 9.1  | 46                | 5.4  |  |
| Primary                          | 69                | 70.5 | 49                | 51.9 | 135               | 44.4 | 230               | 40.4 | 282               | 32.5 |  |
| Junior or Senior                 | 23                | 13.0 | 15                | 14.9 | 91                | 30.5 | 237               | 37.3 | 441               | 45.4 |  |
| University                       | 14                | 8.9  | 254               | 5.8  | 25                | 9.9  | 85                | 13.3 | 182               | 16.8 |  |
| Parental Employment <sup>2</sup> |                   |      |                   |      |                   |      |                   |      |                   |      |  |
| Not Working                      | 53                | 46.3 | 162               | 61.0 | 132               | 44.0 | 317               | 45.3 | 448               | 42.9 |  |
| Agriculture                      | 6                 | 6.9  | 32                | 11.3 | 42                | 14.1 | 76                | 12.9 | 91                | 9.7  |  |
| Skilled Manual <sup>3</sup>      | 19                | 17.8 | 11                | 4.4  | 33                | 13.2 | 54                | 8.1  | 79                | 7.9  |  |
| Skilled <sup>4</sup>             | 36                | 29.0 | 63                | 23.3 | 87                | 28.7 | 232               | 33.7 | 442               | 39.5 |  |
| Maternal Overweight              |                   |      |                   |      |                   |      |                   |      |                   |      |  |
| Not Overweight                   | 60                | 68.9 | 184               | 72.3 | 186               | 66.2 | 356               | 56.2 | 454               | 44.9 |  |
| Overweight                       | 38                | 31.1 | 73                | 27.7 | 96                | 33.8 | 289               | 43.8 | 541               | 55.1 |  |
| Residence                        |                   |      |                   |      |                   |      |                   |      |                   |      |  |
| Rural                            | 61                | 56.7 | 129               | 53.8 | 112               | 39.9 | 255               | 45.3 | 298               | 37.0 |  |
| Urban                            | 100               | 43.3 | 146               | 46.2 | 187               | 60.1 | 442               | 54.7 | 795               | 63.0 |  |
| Wealth                           |                   |      |                   |      |                   |      |                   |      |                   |      |  |
| Lowest                           | 30                | 22.2 | 50                | 22.3 | 36                | 13.1 | 87                | 15.4 | 129               | 16.3 |  |
| Second                           | 17                | 16.1 | 37                | 14.4 | 44                | 18.1 | 142               | 26.0 | 160               | 21.4 |  |
| Middle                           | 36                | 20.5 | 44                | 19.6 | 45                | 20.4 | 75                | 13.0 | 141               | 19.3 |  |
| Fourth                           | 29                | 18.9 | 45                | 20.3 | 48                | 20.6 | 139               | 25.1 | 173               | 21.1 |  |
| Highest                          | 47                | 22.3 | 62                | 23.4 | 66                | 27.9 | 120               | 20.6 | 181               | 21.8 |  |
| Family Size                      |                   |      |                   |      |                   |      |                   |      |                   |      |  |
| ≤ 4                              | 49                | 35.4 | 65                | 22.5 | 114               | 39.4 | 222               | 32.3 | 621               | 58.6 |  |
| > 4                              | 112               | 64.6 | 211               | 77.5 | 185               | 60.6 | 475               | 67.7 | 472               | 41.4 |  |

<sup>1</sup>Overweight is defined as body mass index-for-age z-score > 1 using the WHO Reference. Percentages are weighted to be representative of the population of Indonesia in the given survey year

<sup>2</sup>Parental characteristics are of the mother, when available. When not available the characteristic is based on the father's data

## Online Supplemental Material

<sup>3</sup> Skilled manual labor combines the following employment sectors: mining, manufacturing, electric, gas, water maintenance, and construction

<sup>4</sup> Skilled labor combines the following employment sectors: retail and service, transportation

**Supplemental Table 4. Percent Distribution of Selected Characteristics Among Overweight Children Aged 13-18 in Indonesia Over Time**

|                                        | 1993 <sup>1</sup> |      | 1997 <sup>1</sup> |      | 2000 <sup>1</sup> |      | 2007 <sup>1</sup> |      | 2014 <sup>1</sup> |      |  |
|----------------------------------------|-------------------|------|-------------------|------|-------------------|------|-------------------|------|-------------------|------|--|
|                                        | n                 | %    | n                 | %    | n                 | %    | n                 | %    | n                 | %    |  |
| <b>Age (years)</b>                     |                   |      |                   |      |                   |      |                   |      |                   |      |  |
| 13-15                                  | 45                | 67.9 | 84                | 53.9 | 98                | 47.6 | 301               | 48.5 | 280               | 54.1 |  |
| 16-18                                  | 9                 | 32.0 | 74                | 46.1 | 131               | 52.4 | 107               | 51.5 | 262               | 45.9 |  |
| <b>Gender</b>                          |                   |      |                   |      |                   |      |                   |      |                   |      |  |
| Boys                                   | 40                | 52.2 | 90                | 44.9 | 95                | 35.8 | 150               | 40.7 | 333               | 48.9 |  |
| Girls                                  | 43                | 47.8 | 121               | 55.1 | 179               | 64.2 | 217               | 59.3 | 374               | 51.1 |  |
| <b>Parental Education<sup>2</sup></b>  |                   |      |                   |      |                   |      |                   |      |                   |      |  |
| No Education                           | 7                 | 10.8 | 48                | 27.4 | 45                | 19.5 | 36                | 10.9 | 36                | 6.5  |  |
| Primary                                | 46                | 72.0 | 96                | 53.7 | 136               | 56.3 | 164               | 54.6 | 240               | 42.2 |  |
| Junior or Senior                       | 9                 | 8.0  | 34                | 15.4 | 47                | 17.0 | 93                | 27.2 | 265               | 41.0 |  |
| University                             | 3                 | 9.2  | 7                 | 3.5  | 14                | 7.2  | 23                | 7.3  | 72                | 10.3 |  |
| <b>Parental Employment<sup>2</sup></b> |                   |      |                   |      |                   |      |                   |      |                   |      |  |
| Not Working                            | 38                | 64.9 | 112               | 56.8 | 91                | 36.8 | 132               | 39.9 | 277               | 45.3 |  |
| Agriculture                            | 2                 | 4.3  | 14                | 8.1  | 39                | 16.6 | 43                | 13.7 | 64                | 11.0 |  |
| Skilled Manual <sup>3</sup>            | 4                 | 3.2  | 11                | 4.9  | 15                | 7.4  | 30                | 9.2  | 46                | 8.3  |  |
| Skilled <sup>4</sup>                   | 21                | 27.6 | 59                | 30.2 | 97                | 39.2 | 129               | 37.2 | 260               | 35.3 |  |
| <b>Maternal Overweight</b>             |                   |      |                   |      |                   |      |                   |      |                   |      |  |
| Not Overweight                         | 28                | 57.2 | 110               | 54.3 | 132               | 56.3 | 173               | 54.2 | 256               | 40.7 |  |
| Overweight                             | 29                | 42.8 | 90                | 45.7 | 108               | 43.7 | 155               | 45.8 | 371               | 59.3 |  |
| <b>Household Level</b>                 |                   |      |                   |      |                   |      |                   |      |                   |      |  |
| <b>Residence</b>                       |                   |      |                   |      |                   |      |                   |      |                   |      |  |
| Rural                                  | 20                | 39.7 | 69                | 37.9 | 114               | 45.5 | 134               | 42.4 | 204               | 39.5 |  |
| Urban                                  | 63                | 60.3 | 142               | 62.1 | 160               | 54.5 | 233               | 57.6 | 503               | 60.5 |  |
| <b>Wealth</b>                          |                   |      |                   |      |                   |      |                   |      |                   |      |  |
| Lowest                                 | 11                | 14.6 | 26                | 15.2 | 38                | 16.5 | 46                | 16.6 | 118               | 23.8 |  |
| Second                                 | 5                 | 3.3  | 28                | 13.5 | 40                | 20.0 | 71                | 25.6 | 119               | 24.0 |  |
| Middle                                 | 18                | 30.2 | 44                | 27.8 | 47                | 21.2 | 33                | 12.5 | 80                | 16.1 |  |
| Fourth                                 | 19                | 21.3 | 29                | 17.4 | 37                | 15.3 | 65                | 23.4 | 86                | 18.2 |  |
| Highest                                | 29                | 30.6 | 47                | 26.1 | 58                | 26.9 | 63                | 21.8 | 103               | 17.9 |  |
| <b>Family Size</b>                     |                   |      |                   |      |                   |      |                   |      |                   |      |  |
| ≤ 4                                    | 21                | 29.0 | 31                | 17.0 | 92                | 36.1 | 74                | 21.9 | 353               | 54.6 |  |
| > 4                                    | 62                | 71.0 | 180               | 83.0 | 182               | 63.9 | 293               | 78.1 | 354               | 45.4 |  |

<sup>1</sup> Overweight is defined as body mass index-for-age z-score > 1 using the WHO Reference. Percentages are weighted to be representative of the population of Indonesia in the given survey year

<sup>2</sup> Parental characteristics are of the mother, when available. When not available the characteristic is based on the father's data

## Online Supplemental Material

7

<sup>3</sup> Skilled manual labor combines the following employment sectors: mining, manufacturing, electric, gas, water maintenance, and construction

<sup>4</sup> Skilled labor combines the following employment sectors: retail and service, transportation

**Supplemental Table 5. Univariable Logistic Regression Models Investigating the Associations Between Selected Characteristics and Overweight Among Adults in Indonesia in 2014**

|                                                        | Women <sup>1,2</sup> |                     | Men <sup>1,2</sup> |                      |
|--------------------------------------------------------|----------------------|---------------------|--------------------|----------------------|
|                                                        | n                    | Odds Ratio (95% CI) | n                  | Odds Ratio (95% CI)  |
| <b>Age (years)</b>                                     |                      |                     |                    |                      |
| 19-29                                                  | 4,350                | Reference           | 3,680              | Reference            |
| 30-39                                                  | 4,217                | 2.23 (2.01, 2.46) * | 3,981              | 1.95 (1.72, 2.22) *  |
| 40-49                                                  | 2,807                | 2.93 (2.62, 3.27) * | 2,766              | 2.41 (2.10, 2.76) *  |
| 50-59                                                  | 2,053                | 2.26 (2.00, 2.56) * | 1,748              | 2.09 (1.79, 2.44) *  |
| 60+                                                    | 1,858                | 1.04 (0.91, 1.19)   | 1,612              | 0.95 (0.79, 1.13) *  |
| <b>Education</b>                                       |                      |                     |                    |                      |
| No Education                                           | 1,033                | Reference           | 381                | Reference            |
| Primary                                                | 4,912                | 2.89 (2.42, 3.45) * | 4,192              | 2.44 (1.61, 3.70) *  |
| Junior or Senior                                       | 4,894                | 2.98 (2.49, 3.55) * | 4,901              | 4.30 (2.85, 6.49) *  |
| University                                             | 1,581                | 2.90 (2.36, 3.55) * | 1,487              | 8.48 (5.55, 12.94) * |
| <b>Smoking Status</b>                                  |                      |                     |                    |                      |
| Non-Smoker                                             | 14,772               | Reference           | 4,552              | Reference            |
| Smoker                                                 | 434                  | 0.57 (0.45, 0.72) * | 9,165              | 0.47 (0.43, 0.52) *  |
| <b>Marital Status</b>                                  |                      |                     |                    |                      |
| Never Married                                          | 1,560                | Reference           | 2,436              | Reference            |
| Married                                                | 11,549               | 3.37 (2.88, 3.95) * | 10,780             | 2.04 (1.78, 2.34) *  |
| Other                                                  | 2,172                | 1.78 (1.48, 2.14) * | 565                | 1.10 (0.82, 1.46)    |
| <b>Employment</b>                                      |                      |                     |                    |                      |
| Not Working                                            | 5,713                | Reference           | 1,291              | Reference            |
| Agriculture                                            | 2,355                | 0.73 (0.64, 0.82) * | 3,565              | 0.63 (0.52, 0.77) *  |
| Skilled Manual <sup>3</sup>                            | 1,312                | 0.94 (0.81, 1.09)   | 2,886              | 1.06 (0.88, 1.28)    |
| Skilled <sup>4</sup>                                   | 5,644                | 1.46 (1.33, 1.60) * | 5,799              | 2.03 (1.71, 2.41) *  |
| <b>Physical Activity in the Last Week<sup>5</sup>:</b> |                      |                     |                    |                      |
| No Vigorous Activity                                   | 13,001               | Reference           | 8,360              | Reference            |
| Vigorous Activity                                      | 1,556                | 0.94 (0.82, 1.07)   | 4,762              | 0.69 (0.62, 0.77) *  |
| No Moderate Activity                                   | 6,015                | Reference           | 6,126              | Reference            |
| Moderate Activity                                      | 8,542                | 1.18 (1.09, 1.28) * | 6,996              | 0.98 (0.89, 1.07)    |
| No Walking                                             | 4,706                | Reference           | 3,628              | Reference            |



|                                                              |                 |        |                     |        |                     |
|--------------------------------------------------------------|-----------------|--------|---------------------|--------|---------------------|
| Online Supplemental Material                                 |                 |        |                     |        | 9                   |
|                                                              | Walking         | 9,851  | 0.98 (0.90, 1.07)   | 9,494  | 1.00 (0.90, 1.11)   |
| Consumed in the Last Week:                                   |                 |        |                     |        |                     |
| <i>Instant Noodles</i>                                       |                 |        |                     |        |                     |
|                                                              | No              | 5,125  | Reference           | 4,428  | Reference           |
|                                                              | Yes             | 9,425  | 1.10 (1.01, 1.19) * | 8,685  | 1.03 (0.93, 1.14)   |
| <i>Fast Food</i>                                             |                 |        |                     |        |                     |
|                                                              | No              | 12,902 | Reference           | 11,825 | Reference           |
|                                                              | Yes             | 1,648  | 1.18 (1.04, 1.34) * | 1,288  | 1.55 (1.34, 1.80) * |
| <i>Soda</i>                                                  |                 |        |                     |        |                     |
|                                                              | No              | 12,620 | Reference           | 9,838  | Reference           |
|                                                              | Yes             | 1,930  | 1.05 (0.93, 1.19)   | 3,275  | 1.13 (1.01, 1.25) * |
| <i>Fried Snacks</i>                                          |                 |        |                     |        |                     |
|                                                              | No              | 5,253  | Reference           | 4,468  | Reference           |
|                                                              | Yes             | 9,297  | 1.26 (1.16, 1.37) * | 8,645  | 1.22 (1.10, 1.35) * |
| Mean Number of Days Consumed in the Last Week <sup>6</sup> : |                 |        |                     |        |                     |
|                                                              | Instant Noodles | 9,425  | 1.00 (0.97, 1.03)   | 8,685  | 0.95 (0.92, 0.98) * |
|                                                              | Fast Food       | 1,648  | 0.99 (0.91, 1.08)   | 1,288  | 0.96 (0.83, 1.11)   |
|                                                              | Soda            | 1,930  | 1.01 (0.93, 1.09)   | 3,275  | 0.95 (0.90, 1.01)   |
|                                                              | Fried Snacks    | 9,297  | 1.04 (0.99, 1.06)   | 8,645  | 1.01 (0.99, 1.04)   |
| Food Expenditures <sup>7</sup>                               |                 |        |                     |        |                     |
| <i>Rice</i>                                                  |                 |        |                     |        |                     |
|                                                              | Lowest          | 7,946  | Reference           | 7,165  | Reference           |
|                                                              | Highest         | 7,315  | 1.14 (1.05, 1.23) * | 6,583  | 0.99 (0.90, 1.08)   |
| <i>Cooking oil</i>                                           |                 |        |                     |        |                     |
|                                                              | Lowest          | 9,192  | Reference           | 8,391  | Reference           |
|                                                              | Highest         | 6,067  | 1.25 (1.15, 1.36) * | 5,355  | 1.34 (1.21, 1.47) * |
| Residence                                                    |                 |        |                     |        |                     |
|                                                              | Rural           | 6,242  | Reference           | 5,688  | Reference           |
|                                                              | Urban           | 9,043  | 1.39 (1.29, 1.51) * | 8,097  | 1.92 (1.74, 2.12) * |
| Wealth                                                       |                 |        |                     |        |                     |
|                                                              | Lowest          | 2,818  | Reference           | 2,879  | Reference           |
|                                                              | Second          | 2,538  | 1.22 (1.06, 1.39) * | 2,528  | 1.25 (1.07, 1.47) * |

## Online Supplemental Material

10

|         |       |                     |       |                     |
|---------|-------|---------------------|-------|---------------------|
| Middle  | 1,829 | 1.19 (1.03, 1.38) * | 1,863 | 1.40 (1.18, 1.66) * |
| Fourth  | 2,129 | 1.14 (0.99, 1.32)   | 2,104 | 1.54 (1.31, 1.81) * |
| Highest | 1,998 | 1.19 (1.03, 1.36) * | 1,956 | 2.16 (1.85, 2.52) * |

## Family Size

|     |       |                   |       |                   |
|-----|-------|-------------------|-------|-------------------|
| ≤ 4 | 9,542 | Reference         | 8,590 | Reference         |
| > 4 | 5,743 | 0.96 (0.89, 1.04) | 5,195 | 0.97 (0.88, 1.07) |

CI = confidence interval

<sup>1</sup> Overweight is defined as body mass index  $\geq 25$  kg/m<sup>2</sup><sup>2</sup> Odds ratios and confidence intervals are estimated using logistic regression and are weighted to account for the survey design. Models exclude women who are currently pregnant.<sup>3</sup> Skilled manual labor combines the following employment sectors: mining, manufacturing, electric, gas, water maintenance, and construction<sup>4</sup> Skilled labor combines the following employment sectors: retail and service, transportation<sup>5</sup> Defined using the International Physical Activity Questionnaire<sup>6</sup> Modelled as a continuous variable, the average number of days consumed is queried if the respondent reported that they consumed item during the last week<sup>7</sup> Indicates the household level expenditure on each item as a percentage of the households' total expenditures on food\*  $p < 0.05$

**Supplemental Table 6. Univariable Logistic Regression Models Investigating the Associations Between Selected Characteristics and Overweight Among Children in Indonesia in 2014**

|                                                  | 6 months - 5 years <sup>1</sup> |                        | 6-12 years <sup>2</sup> |                        | 13-18 years <sup>2</sup> |                        |
|--------------------------------------------------|---------------------------------|------------------------|-------------------------|------------------------|--------------------------|------------------------|
|                                                  | n                               | Odds Ratio<br>(95% CI) | n                       | Odds Ratio<br>(95% CI) | n                        | Odds Ratio<br>(95% CI) |
| Mean Age <sup>3</sup>                            | 4,965                           | 0.88 (0.80, 0.97) *    | 7,012                   | 1.06 (1.02, 1.10) *    | 4,868                    | 0.87 (0.83, 0.92) *    |
| Gender                                           |                                 |                        |                         |                        |                          |                        |
| Boys                                             | 2,585                           | Reference              | 3,601                   | Reference              | 2,462                    | Reference              |
| Girls                                            | 2,380                           | 0.75 (0.59, 0.96) *    | 3,411                   | 0.87 (0.76, 1.01)      | 2,406                    | 1.20 (1.01, 1.44) *    |
| Ever Breastfed <sup>4</sup>                      |                                 |                        |                         |                        |                          |                        |
| No                                               | 140                             | Reference              |                         | na                     |                          | na                     |
| Yes                                              | 4,429                           | 1.15 (0.53, 2.47)      |                         | na                     |                          | na                     |
| Exclusively Breastfed <sup>4</sup>               |                                 |                        |                         |                        |                          |                        |
| No                                               | 3,646                           | Reference              |                         |                        |                          |                        |
| Yes                                              | 923                             | 0.82 (0.59, 1.15)      |                         | na                     |                          | na                     |
| Introduction of Complementary Foods <sup>4</sup> |                                 |                        |                         |                        |                          |                        |
| < 6 months or ≥ 8 months                         | 3,379                           | Reference              |                         | na                     |                          | na                     |
| ≥ 6 months to < 8 months                         | 840                             | 0.82 (0.58, 1.16)      |                         | na                     |                          | na                     |
| Parental Education <sup>5</sup>                  |                                 |                        |                         |                        |                          |                        |
| No Education                                     | 251                             | Reference              | 419                     | Reference              | 353                      | Reference              |
| Primary                                          | 1,562                           | 1.39 (0.65, 2.98)      | 2,449                   | 1.11 (0.76, 1.61)      | 1,904                    | 1.26 (0.83, 1.91)      |
| Junior or Senior                                 | 2,055                           | 1.69 (0.80, 3.59)      | 2,690                   | 1.70 (1.17, 2.46) *    | 1,555                    | 1.73 (1.14, 2.63) *    |
| University                                       | 564                             | 2.29 (1.04, 5.05) *    | 686                     | 3.00 (2.01, 4.47) *    | 331                      | 2.13 (1.31, 3.46) *    |

## Online Supplemental Material

12

Parental Employment<sup>5</sup>

|                             |       |                     |       |                     |       |                     |
|-----------------------------|-------|---------------------|-------|---------------------|-------|---------------------|
| Not Working                 | 2,564 | Reference           | 2,804 | Reference           | 1,729 | Reference           |
| Agriculture                 | 569   | 0.51 (0.30, 0.86) * | 1,111 | 0.50 (0.38, 0.65)   | 737   | 0.51 (0.37, 0.71) * |
| Skilled Manual <sup>6</sup> | 325   | 0.98 (0.60, 1.60)   | 559   | 0.81 (0.61, 1.08)   | 394   | 0.72 (0.50, 1.04)   |
| Skilled <sup>7</sup>        | 1,469 | 1.22 (0.94, 1.59)   | 2,399 | 1.22 (1.04, 1.43) * | 1,550 | 0.94 (0.76, 1.15)   |

## Maternal Overweight

|                |       |                     |       |                     |       |                     |
|----------------|-------|---------------------|-------|---------------------|-------|---------------------|
| Not Overweight | 3,068 | Reference           | 3,864 | Reference           | 2,459 | Reference           |
| Overweight     | 1,664 | 1.31 (1.02, 1.67) * | 2,597 | 2.03 (1.75, 2.37) * | 1,835 | 2.18 (1.80, 2.64) * |

## Consumed in the Last Week:

*Instant Noodles*

|     |       |                     |       |                   |       |                   |
|-----|-------|---------------------|-------|-------------------|-------|-------------------|
| No  | 2,002 | Reference           | 1,616 | Reference         | 581   | Reference         |
| Yes | 2,613 | 0.69 (0.53, 0.90) * | 5,382 | 1.03 (0.87, 1.23) | 2,076 | 1.03 (0.78, 1.36) |

*Fast Food*

|     |       |                     |       |                     |       |                   |
|-----|-------|---------------------|-------|---------------------|-------|-------------------|
| No  | 3,941 | Reference           | 5,669 | Reference           | 2,209 | Reference         |
| Yes | 674   | 1.39 (1.01, 1.93) * | 1,329 | 1.43 (1.21, 1.69) * | 448   | 1.13 (0.85, 1.50) |

*Soda*

|     |       |                   |       |                   |       |                   |
|-----|-------|-------------------|-------|-------------------|-------|-------------------|
| No  | 4,342 | Reference         | 5,942 | Reference         | 2,011 | Reference         |
| Yes | 273   | 0.89 (0.50, 1.59) | 1,056 | 1.17 (0.97, 1.42) | 646   | 1.09 (0.84, 1.41) |

*Fried Snacks*

|     |       |                   |       |                   |       |                   |
|-----|-------|-------------------|-------|-------------------|-------|-------------------|
| No  | 2,393 | Reference         | 2,531 | Reference         | 825   | Reference         |
| Yes | 2,222 | 0.83 (0.64, 1.08) | 4,467 | 1.12 (0.96, 1.31) | 1,832 | 0.99 (0.78, 1.26) |

## Mean Number of Days

Consumed in the Last Week<sup>8</sup>:

|                 |       |                   |       |                   |       |                   |
|-----------------|-------|-------------------|-------|-------------------|-------|-------------------|
| Instant Noodles | 2,613 | 1.00 (0.91, 1.10) | 5,382 | 0.99 (0.95, 1.03) | 2,076 | 0.99 (0.93, 1.05) |
|-----------------|-------|-------------------|-------|-------------------|-------|-------------------|

## Online Supplemental Material

13

|                                      |       |                     |       |                     |       |                     |
|--------------------------------------|-------|---------------------|-------|---------------------|-------|---------------------|
| Fast Food                            | 674   | 0.88 (0.74, 1.05)   | 1,329 | 0.91 (0.83, 1.00)   | 448   | 0.90 (0.77, 1.05)   |
| Soda                                 | 2,222 | 0.89 (0.51, 1.55)   | 1,056 | 1.05 (0.96, 1.16)   | 646   | 1.10 (0.98, 1.24)   |
| Fried Snacks                         | 3,671 | 0.97 (0.89, 1.05)   | 4,467 | 0.98 (0.94, 1.01)   | 1,832 | 0.97 (0.92, 1.03)   |
| <b>Food Expenditures<sup>9</sup></b> |       |                     |       |                     |       |                     |
| <i>Rice</i>                          |       |                     |       |                     |       |                     |
| Lowest                               | 2,469 | Reference           | 3,334 | Reference           | 2,151 | Reference           |
| Highest                              | 2,489 | 1.15 (0.91, 1.46)   | 3,662 | 0.86 (0.75, 1.00)   | 2,704 | 0.93 (0.78, 1.11)   |
| <i>Cooking oil</i>                   |       |                     |       |                     |       |                     |
| Lowest                               | 2,992 | Reference           | 3,993 | Reference           | 2,785 | Reference           |
| Highest                              | 1,966 | 1.23 (0.97, 1.57)   | 3,002 | 1.16 (1.00, 1.34)   | 2,071 | 1.11 (0.93, 1.33)   |
| <b>Residence</b>                     |       |                     |       |                     |       |                     |
| Rural                                | 2,083 | Reference           | 2,915 | Reference           | 1,969 | Reference           |
| Urban                                | 2,882 | 1.57 (1.22, 2.02) * | 4,097 | 2.01 (1.72, 2.35) * | 2,899 | 1.71 (1.42, 2.07) * |
| <b>Wealth</b>                        |       |                     |       |                     |       |                     |
| Lowest                               | 1,008 | Reference           | 1,247 | Reference           | 876   | Reference           |
| Second                               | 964   | 1.37 (0.91, 2.06)   | 1,193 | 1.50 (1.14, 1.98) * | 802   | 1.12 (0.83, 1.52)   |
| Middle                               | 654   | 1.25 (0.79, 1.98)   | 908   | 1.78 (1.34, 2.36) * | 566   | 1.06 (0.76, 1.48)   |
| Fourth                               | 783   | 1.42 (0.93, 2.15)   | 1,037 | 1.64 (1.25, 2.15) * | 617   | 1.08 (0.77, 1.51)   |
| Highest                              | 656   | 1.37 (0.89, 2.11)   | 993   | 1.83 (1.39, 2.40) * | 617   | 1.12 (0.82, 1.54)   |
| <b>Family Size</b>                   |       |                     |       |                     |       |                     |
| ≤ 4                                  | 2,645 | Reference           | 3,523 | Reference           | 2,322 | Reference           |
| > 4                                  | 2,320 | 0.99 (0.78, 1.26)   | 3,489 | 0.75 (0.65, 0.87) * | 2,546 | 0.83 (0.70, 0.99) * |

CI = confidence interval; na = not applicable

<sup>1</sup> Overweight is defined as weight-for-height z-score > 2 using the MGRS Standard, estimated using logistic regression models and are weighted to account for the survey design

## Online Supplemental Material

14

<sup>2</sup> Overweight is defined as BMI z-score > 1 using the WHO reference, estimated using logistic regression models and are weighted to account for the survey design

<sup>3</sup> Modelled as a continuous variable

<sup>4</sup> Breastfeeding data are reported by the mother retrospectively. Exclusively breastfed indicates whether the child was only given breastmilk (no water or complementary foods) when the child was aged 0-6 months. Complementary foods indicate appropriate timing of complementary foods, that is, the introduction of complementary foods when the child was 6-8 months old.

<sup>5</sup> Parental characteristics are of the mother, when available. When not available the characteristic is based on the father's data

<sup>6</sup> Skilled manual labor combines the following employment sectors: mining, manufacturing, electric, gas, water maintenance, and construction

<sup>7</sup> Skilled labor combines the following employment sectors: retail and service, transportation

<sup>8</sup> Modelled as a continuous variable, the average number of days consumed is queried if the respondent reported that they consumed item during the last week

<sup>9</sup> Indicates the household level expenditure on each item as a percentage of the households' total expenditures on food

**Supplemental Table 7. Longitudinal Associations Between Selected Characteristics and Overweight Among Adult Women Aged 19 + in Indonesia 1993-2014**

|                                |                             | Risk Ratio (95% Confidence Interval) |                              |
|--------------------------------|-----------------------------|--------------------------------------|------------------------------|
|                                |                             | Univariate <sup>1,2</sup>            | Multivariable <sup>1,2</sup> |
|                                |                             | Risk Ratio (95% CI)                  | Risk Ratio (95% CI)          |
| Age (years)                    | N=29,541                    |                                      |                              |
|                                | 19-29                       | Reference                            | Reference                    |
|                                | 30-39                       | 2.00 (1.85, 2.17) *                  | 1.75 (1.56, 1.97) *          |
|                                | 40-49                       | 2.33 (2.16, 2.51) *                  | 2.02 (1.80, 2.27) *          |
|                                | 50-59                       | 1.85 (1.71, 2.00) *                  | 1.76 (1.56, 1.98) *          |
|                                | 60+                         | 1.09 (1.00, 1.19) *                  | 1.39 (1.21, 1.59) *          |
| Education                      | N=25,970                    |                                      |                              |
|                                | No Education                | Reference                            | Reference                    |
|                                | Primary                     | 2.05 (1.89, 2.23) *                  | 1.63 (1.47, 1.80) *          |
|                                | Junior or Senior            | 2.00 (1.82, 2.18) *                  | 1.60 (1.42, 1.80) *          |
|                                | University                  | 2.03 (1.81, 2.28) *                  | 1.53 (1.32, 1.78) *          |
| Smoking Status                 | N=28,967                    |                                      |                              |
|                                | Non-Smoker                  | Reference                            | Reference                    |
|                                | Smoker                      | 0.58 (0.51, 0.66) *                  | 0.75 (0.65, 0.87) *          |
| Marital Status                 | N=29,055                    |                                      |                              |
|                                | Never Married               | Reference                            | Reference                    |
|                                | Married                     | 3.03 (2.63, 3.49) *                  | 2.25 (1.81, 2.81) *          |
|                                | Other                       | 2.01 (1.73, 2.34) *                  | 1.60 (1.25, 2.06) *          |
| Employment                     | N=28,726                    |                                      |                              |
|                                | Not Working                 | Reference                            | Reference                    |
|                                | Agriculture                 | 0.72 (0.67, 0.77) *                  | 0.77 (0.71, 0.84) *          |
|                                | Skilled Manual <sup>3</sup> | 0.90 (0.82, 0.98) *                  | 0.93 (0.84, 1.04)            |
|                                | Skilled <sup>4</sup>        | 1.30 (1.23, 1.36) *                  | 1.13 (1.07, 1.20) *          |
| Food Expenditures <sup>5</sup> |                             |                                      |                              |
|                                | <i>Rice</i>                 |                                      |                              |
|                                | Lowest                      | Reference                            | Reference                    |
|                                | Highest                     | 1.12 (1.07, 1.17) *                  | 1.00 (0.95, 1.06)            |
|                                | <i>Soda</i>                 |                                      |                              |
|                                | Lowest                      | Reference                            | Reference                    |
|                                | Highest                     | 1.26 (1.19, 1.33) *                  | 1.13 (1.06, 1.21) *          |

## Online Supplemental Material

16

|             |                    |          |                     |                     |
|-------------|--------------------|----------|---------------------|---------------------|
|             | <i>Snacks</i>      | N=29,057 |                     |                     |
|             | Lowest             |          | Reference           | Reference           |
|             | Highest            |          | 1.20 (1.15, 1.25) * | 1.03 (0.98, 1.09)   |
|             | <i>Cooking oil</i> | N=29,172 |                     |                     |
|             | Lowest             |          | Reference           | Reference           |
|             | Highest            |          | 1.31 (1.25, 1.37) * | 1.17 (1.11, 1.23) * |
| Residence   |                    | N=29,537 |                     |                     |
|             | Rural              |          | Reference           | Reference           |
|             | Urban              |          | 1.49 (1.43, 1.56) * | 1.31 (1.24, 1.39) * |
| Wealth      |                    | N=23,055 |                     |                     |
|             | Lowest             |          | Reference           | Reference           |
|             | Second             |          | 1.21 (1.11, 1.31) * | 1.16 (1.06, 1.26) * |
|             | Middle             |          | 1.26 (1.16, 1.36) * | 1.17 (1.07, 1.27) * |
|             | Fourth             |          | 1.37 (1.26, 1.48) * | 1.21 (1.11, 1.32) * |
|             | Highest            |          | 1.40 (1.30, 1.52) * | 1.17 (1.07, 1.27) * |
| Family Size |                    | N=29,540 |                     |                     |
|             | ≤ 4                |          | Reference           | Reference           |
|             | > 4                |          | 1.08 (1.03, 1.13) * | 0.93 (0.88, 0.99) * |

CI = confidence interval

<sup>1</sup> Overweight is defined as body mass index  $\geq 25$  kg/m<sup>2</sup><sup>2</sup> Risk Ratios and confidence intervals are estimated using a modified Poisson model and are weighted to account for the survey design. Excludes pregnant women. N =18,018 in multivariable model<sup>3</sup> Skilled manual labor combines the following employment sectors: mining, manufacturing, electric, gas, water maintenance, and construction<sup>4</sup> Skilled labor combines the following employment sectors: retail and service, transportation<sup>5</sup> Indicates the household level expenditure on each item as a percentage of the households' total expenditures on food\*  $p < 0.05$



**Supplemental Table 8. Longitudinal Association Between Selected Characteristics and Overweight Among Adult Men Aged 19 + in Indonesia 1993-2014**

|                                |                             | Univariate <sup>1,2</sup> | Multivariable <sup>1,2</sup> |
|--------------------------------|-----------------------------|---------------------------|------------------------------|
|                                |                             | Risk Ratio (95% CI)       | Risk Ratio (95% CI)          |
| Age                            | N=24,169                    |                           |                              |
|                                | 19-29 y                     | Reference                 | Reference                    |
|                                | 30-39 y                     | 2.18 (1.90, 2.50) *       | 1.74 (1.32, 2.28) *          |
|                                | 40-49 y                     | 2.64 (2.32, 3.00) *       | 2.04 (1.57, 2.66) *          |
|                                | 50-59 y                     | 2.18 (1.92, 2.47) *       | 1.90 (1.46, 2.48) *          |
|                                | 60+ y                       | 1.13 (0.98, 1.30)         | 1.24 (0.94, 1.65)            |
| Education                      | N=21,072                    |                           |                              |
|                                | No Education                | Reference                 | Reference                    |
|                                | Primary                     | 2.26 (1.74, 2.94) *       | 1.56 (1.17, 2.08) *          |
|                                | Junior or Senior            | 4.06 (3.11, 5.29) *       | 2.39 (1.77, 3.22) *          |
|                                | University                  | 6.80 (5.18, 8.94) *       | 2.82 (2.07, 3.85) *          |
| Smoking Status                 | N=23,764                    |                           |                              |
|                                | Non-smoker                  | Reference                 | Reference                    |
|                                | Smoker                      | 0.54 (0.50, 0.58) *       | 0.66 (0.60, 0.72) *          |
| Marital Status                 | N=23,846                    |                           |                              |
|                                | Never Married               | Reference                 | Reference                    |
|                                | Married                     | 2.07 (1.80, 2.38) *       | 1.87 (1.38, 2.53) *          |
|                                | Other                       | 1.35 (1.02, 1.78) *       | 1.41 (0.85, 2.33)            |
| Employment                     | N=23,463                    |                           |                              |
|                                | Not Working                 | Reference                 | Reference                    |
|                                | Agriculture                 | 0.65 (0.55, 0.76) *       | 0.60 (0.50, 0.72) *          |
|                                | Skilled Manual <sup>3</sup> | 1.19 (1.02, 1.38) *       | 0.92 (0.76, 1.10)            |
|                                | Skilled <sup>4</sup>        | 2.10 (1.85, 2.39) *       | 1.30 (1.12, 1.52) *          |
| Food Expenditures <sup>5</sup> |                             |                           |                              |
|                                | <i>Rice</i>                 | N=23,310                  |                              |
|                                | Lowest                      | Reference                 | na                           |
|                                | Highest                     | 1.01 (0.93, 1.09)         | na                           |
|                                | <i>Soda</i>                 | N=22,283                  |                              |
|                                | Lowest                      | Reference                 | Reference                    |
|                                | Highest                     | 1.56 (1.43, 1.71) *       | 1.15 (1.05, 1.27) *          |

## Online Supplemental Material

18

|             |                    |          |                     |                     |
|-------------|--------------------|----------|---------------------|---------------------|
|             | <i>Snacks</i>      | N=23,703 |                     |                     |
|             | Lowest             |          | Reference           | Reference           |
|             | Highest            |          | 1.58 (1.46, 1.71) * | 1.11 (1.01, 1.22) * |
|             | <i>Cooking oil</i> | N=23,797 |                     |                     |
|             | Lowest             |          | Reference           | Reference           |
|             | Highest            |          | 1.55 (1.44, 1.68) * | 1.23 (1.12, 1.34) * |
| Residence   |                    | N=24,168 |                     |                     |
|             | Rural              |          | Reference           | Reference           |
|             | Urban              |          | 1.97 (1.82, 2.14) * | 1.27 (1.15, 1.40) * |
| Wealth      |                    | N=21,036 |                     |                     |
|             | Lowest             |          | Reference           | Reference           |
|             | Second             |          | 1.26 (1.09, 1.46) * | 1.10 (0.94, 1.29) * |
|             | Middle             |          | 1.56 (1.35, 1.80) * | 1.30 (1.12, 1.52) * |
|             | Fourth             |          | 1.79 (1.56, 2.06) * | 1.30 (1.12, 1.51) * |
|             | Highest            |          | 2.44 (2.14, 2.79) * | 1.39 (1.20, 1.62) * |
| Family Size |                    | N=24,169 |                     |                     |
|             | ≤ 4                |          | Reference           | Reference           |
|             | > 4                |          | 1.11 (1.02, 1.20) * | 1.02 (0.93, 1.12)   |

CI = confidence interval; na = not applicable

<sup>1</sup> Overweight is defined as BMI ≥ 25 kg/m<sup>2</sup>

<sup>2</sup> Risk Ratios and confidence intervals are estimated using a modified Poisson model and are weighted to account for the survey design. N=16,519 in multivariable model

<sup>3</sup> Skilled manual labor combines the following employment sectors: mining, manufacturing, electric, gas, water maintenance, and construction

<sup>4</sup> Skilled labor combines the following employment sectors: retail and service, transportation

<sup>5</sup> Indicates the household level expenditure on each item as a percentage of the households' total expenditures on food

\*  $p < 0.05$
